# Supplementary material for: New Conjugated Compound T5 Epidioxy-Sterol-ANB Inhibits the Growth of Mycobacterium tuberculosis Affecting the Cholesterol and Folate Pathways
Source: Front Microbiol. 2020 Sep 10;11:537935. doi: 10.3389/fmicb.2020.537935 (PMC7533559; doi:10.3389/fmicb.2020.537935)
Supplement: TABLE S1 — THP-1 Macrophage transcriptome. [file Table_1.XLSX]

## Sheet: DMSO vs T5 4hrs
Gene	logFC	logCPM	PValue	FDR
ENSG00000275708	11	2.17	3.55e-23	4.82e-19
ENSG00000121297	3.52	-0.319	2.41e-05	0.164
ENSG00000273449	3.12	-0.64	0.000342	0.705
ENSG00000228852	2.97	-0.405	0.000211	0.661
ENSG00000242110	2.85	-0.5	0.000372	0.705
ENSG00000105523	2.72	-0.602	0.000884	0.801
ENSG00000106178	2.72	-0.602	0.000884	0.801
ENSG00000273036	2.47	-0.283	0.000668	0.801
ENSG00000155754	2.36	0.00131	0.000415	0.705
ENSG00000196600	2.15	-0.527	0.00407	1
ENSG00000266053	2.15	-0.527	0.00407	1
ENSG00000197580	2.14	-0.337	0.00282	1
ENSG00000127083	2.06	-0.397	0.00461	1
ENSG00000259659	2.03	-0.249	0.00322	1
ENSG00000163564	1.93	-0.491	0.00758	1
ENSG00000196345	1.89	0.183	0.00181	1
ENSG00000164989	1.86	-0.22	0.00561	1
ENSG00000181754	1.86	0.163	0.00218	1
ENSG00000207652	1.83	-0.394	0.0082	1
ENSG00000261269	1.82	-0.113	0.00491	1
ENSG00000200169	1.78	-0.139	0.00607	1
ENSG00000228816	1.78	-0.0145	0.00434	1
ENSG00000197566	1.72	0.056	0.00568	1
ENSG00000280067	1.7	0.432	0.00386	1
ENSG00000163697	1.68	-0.0861	0.00795	1
ENSG00000260708	1.67	-0.217	0.0115	1
ENSG00000273340	1.67	-0.217	0.0115	1
ENSG00000278932	1.66	-0.361	0.0171	1
ENSG00000187372	1.65	0.306	0.00593	1
ENSG00000218537	1.65	-0.111	0.00973	1
ENSG00000160062	1.62	-0.391	0.0171	1
ENSG00000275807	1.62	-0.391	0.0171	1
ENSG00000279400	1.59	-0.272	0.0175	1
ENSG00000155714	1.58	-0.422	0.0214	1
ENSG00000232187	1.57	-0.162	0.0146	1
ENSG00000266918	1.57	-0.162	0.0146	1
ENSG00000273344	1.57	0.0584	0.00873	1
ENSG00000187699	1.56	-0.0594	0.0123	1
ENSG00000230953	1.55	-0.3	0.0217	1
ENSG00000213160	1.54	0.23	0.0114	1
ENSG00000280063	1.53	0.308	0.00998	1
ENSG00000172260	1.51	-0.329	0.0268	1
ENSG00000236499	1.51	-0.329	0.0268	1
ENSG00000142621	1.5	0.104	0.013	1
ENSG00000235299	1.5	0.104	0.013	1
ENSG00000256594	1.5	0.944	0.00539	1
ENSG00000162032	1.49	-0.108	0.0181	1
ENSG00000213337	1.49	0.436	0.0105	1
ENSG00000106258	1.47	-0.358	0.0268	1
ENSG00000127152	1.47	0.0827	0.013	1
ENSG00000213700	1.47	0.0827	0.013	1
ENSG00000234473	1.47	0.57	0.00825	1
ENSG00000246889	1.47	-0.358	0.0268	1
ENSG00000267430	1.47	-0.00962	0.0152	1
ENSG00000138080	1.46	0.419	0.0105	1
ENSG00000177732	1.46	0.488	0.0107	1
ENSG00000146374	1.44	0.402	0.0121	1
ENSG00000186310	1.44	0.329	0.0139	1
ENSG00000241860	1.44	-0.033	0.0183	1
ENSG00000134198	1.42	0.31	0.0162	1
ENSG00000197776	1.42	-0.269	0.0328	1
ENSG00000212978	1.42	-0.388	0.0332	1
ENSG00000258012	1.42	-0.269	0.0328	1
ENSG00000056998	1.41	-0.159	0.0267	1
ENSG00000204379	1.4	0.0385	0.0185	1
ENSG00000102984	1.37	-0.185	0.0324	1
ENSG00000246731	1.37	-0.185	0.0324	1
ENSG00000240132	1.36	0.793	0.0104	1
ENSG00000111058	1.34	0.723	0.0131	1
ENSG00000139292	1.34	0.474	0.019	1
ENSG00000225465	1.34	0.172	0.0303	1
ENSG00000239556	1.33	-0.326	0.0401	1
ENSG00000167208	1.32	0.821	0.0151	1
ENSG00000234964	1.31	0.234	0.0299	1
ENSG00000128394	1.3	-0.131	0.0384	1
ENSG00000187695	1.3	0.0631	0.0362	1
ENSG00000207741	1.3	-0.131	0.0384	1
ENSG00000236833	1.3	-0.0306	0.0315	1
ENSG00000251158	1.3	-0.0306	0.0315	1
ENSG00000269069	1.3	0.636	0.0168	1
ENSG00000114204	1.29	-0.355	0.049	1
ENSG00000125780	1.29	0.369	0.0253	1
ENSG00000163145	1.29	-0.355	0.049	1
ENSG00000172061	1.29	-0.355	0.049	1
ENSG00000226266	1.29	-0.355	0.049	1
ENSG00000275888	1.28	0.294	0.0295	1
ENSG00000175745	1.26	-0.156	0.0462	1
ENSG00000184898	1.26	0.781	0.0213	1
ENSG00000228606	1.26	-0.156	0.0462	1
ENSG00000071575	1.25	-0.266	0.0576	1
ENSG00000144935	1.25	0.606	0.0216	1
ENSG00000164093	1.25	-0.266	0.0576	1
ENSG00000225082	1.25	-0.266	0.0576	1
ENSG00000273369	1.25	-0.266	0.0576	1
ENSG00000049323	1.24	0.476	0.0285	1
ENSG00000143257	1.24	0.406	0.0288	1
ENSG00000235863	1.24	0.476	0.0285	1
ENSG00000254612	1.23	0.333	0.0337	1
ENSG00000270427	1.23	-0.0786	0.0449	1
ENSG00000019485	1.22	-0.182	0.0554	1
ENSG00000207344	1.22	-0.182	0.0554	1
ENSG00000215859	1.22	0.174	0.0472	1
ENSG00000259531	1.22	-0.182	0.0554	1
ENSG00000183166	1.21	0.575	0.0279	1
ENSG00000233622	1.21	0.0874	0.0486	1
ENSG00000260314	1.21	0.85	0.0236	1
ENSG00000074966	1.2	0.939	0.021	1
ENSG00000157992	1.2	-0.00473	0.0589	1
ENSG00000163293	1.2	0.51	0.0321	1
ENSG00000165879	1.2	0.51	0.0321	1
ENSG00000271483	1.2	-0.00473	0.0589	1
ENSG00000160838	1.19	-0.103	0.0535	1
ENSG00000239280	1.19	0.153	0.0472	1
ENSG00000260035	1.19	1.92	0.0119	1
ENSG00000203724	1.18	-0.209	0.0665	1
ENSG00000163794	1.17	0.608	0.0312	1
ENSG00000168077	1.17	0.216	0.0532	1
ENSG00000092067	1.16	-0.323	0.0696	1
ENSG00000106809	1.16	-0.323	0.0696	1
ENSG00000151470	1.16	1.37	0.0201	1
ENSG00000159674	1.16	0.133	0.0549	1
ENSG00000168785	1.16	1.24	0.0222	1
ENSG00000176153	1.16	-0.323	0.0696	1
ENSG00000236581	1.16	-0.323	0.0696	1
ENSG00000236583	1.16	-0.323	0.0696	1
ENSG00000249249	1.16	-0.323	0.0696	1
ENSG00000268568	1.16	-0.323	0.0696	1
ENSG00000275004	1.16	0.952	0.0256	1
ENSG00000248932	1.15	-0.128	0.0637	1
ENSG00000249175	1.15	-0.128	0.0637	1
ENSG00000261239	1.15	-0.128	0.0637	1
ENSG00000207217	1.14	-0.236	0.0797	1
ENSG00000263307	1.14	-0.236	0.0797	1
ENSG00000159261	1.13	-0.0519	0.0813	1
ENSG00000276148	1.13	-0.0519	0.0813	1
ENSG00000091128	1.12	0.391	0.0487	1
ENSG00000120784	1.12	0.391	0.0487	1
ENSG00000152284	1.12	0.111	0.0638	1
ENSG00000152454	1.12	0.258	0.0594	1
ENSG00000198453	1.12	0.111	0.0638	1
ENSG00000204301	1.12	0.391	0.0487	1
ENSG00000047365	1.1	1.08	0.03	1
ENSG00000267712	1.1	0.317	0.0574	1
ENSG00000281357	1.1	0.317	0.0574	1
ENSG00000162643	1.09	0.813	0.0442	1
ENSG00000166821	1.09	0.238	0.0683	1
ENSG00000226742	1.09	-0.264	0.0797	1
ENSG00000260693	1.09	-0.0761	0.0953	1
ENSG00000231793	1.07	-0.18	0.0902	1
ENSG00000234284	1.07	1.28	0.0329	1
ENSG00000237438	1.07	-0.00229	0.0904	1
ENSG00000261643	1.07	-0.00229	0.0904	1
ENSG00000269973	1.07	-0.00229	0.0904	1
ENSG00000270903	1.07	0.156	0.0711	1
ENSG00000137274	1.06	0.0679	0.0861	1
ENSG00000170458	1.06	0.219	0.0786	1
ENSG00000236871	1.06	0.0679	0.0861	1
ENSG00000256746	1.06	0.219	0.0786	1
ENSG00000259781	1.06	2.03	0.0221	1
ENSG00000164128	1.05	-0.101	0.112	1
ENSG00000171631	1.05	0.279	0.0753	1
ENSG00000181513	1.05	0.53	0.0576	1
ENSG00000196376	1.05	0.967	0.041	1
ENSG00000204131	1.05	0.279	0.0753	1
ENSG00000229325	1.05	-0.292	0.0955	1
ENSG00000258568	1.04	0.135	0.0821	1
ENSG00000183742	1.03	1.07	0.0426	1
ENSG00000228817	1.03	0.337	0.0724	1
ENSG00000279476	1.03	-0.206	0.107	1
ENSG00000270055	1.02	0.564	0.0629	1
ENSG00000164932	1.01	1.24	0.0455	1
ENSG00000245937	1.01	0.446	0.0673	1
ENSG00000278467	1.01	-0.126	0.101	1
ENSG00000235674	1	-0.0494	0.123	1
ENSG00000239382	1	0.319	0.0825	1
ENSG00000252947	0.994	0.375	0.0792	1
ENSG00000161955	0.993	0.548	0.0708	1
ENSG00000235859	0.993	1.16	0.0513	1
ENSG00000239653	0.993	1.16	0.0513	1
ENSG00000058673	0.99	0.842	0.0634	1
ENSG00000074590	0.988	-0.233	0.127	1
ENSG00000241741	0.988	-0.233	0.127	1
ENSG00000139178	0.985	0.429	0.0761	1
ENSG00000226312	0.977	1.04	0.0559	1
ENSG00000229097	0.976	0.482	0.0733	1
ENSG00000261289	0.975	0.0921	0.109	1
ENSG00000278991	0.975	0.0921	0.109	1
ENSG00000114757	0.974	-0.151	0.119	1
ENSG00000260274	0.974	-0.151	0.119	1
ENSG00000182185	0.97	1.49	0.0482	1
ENSG00000276724	0.968	0.532	0.0708	1
ENSG00000215067	0.966	1.11	0.062	1
ENSG00000204261	0.965	0.993	0.0572	1
ENSG00000139055	0.964	0.158	0.104	1
ENSG00000249700	0.964	0.158	0.104	1
ENSG00000219200	0.958	0.907	0.0661	1
ENSG00000188785	0.957	1.74	0.0467	1
ENSG00000279390	0.955	0.221	0.113	1
ENSG00000148848	0.95	0.000147	0.134	1
ENSG00000178878	0.95	0.465	0.0827	1
ENSG00000198838	0.95	0.000147	0.134	1
ENSG00000244513	0.95	0.000147	0.134	1
ENSG00000278864	0.95	0.000147	0.134	1
ENSG00000279355	0.95	1.33	0.0535	1
ENSG00000213846	0.947	0.674	0.0856	1
ENSG00000139537	0.946	0.281	0.107	1
ENSG00000232783	0.944	-0.261	0.127	1
ENSG00000183060	0.943	2.37	0.0391	1
ENSG00000140939	0.941	1.5	0.0543	1
ENSG00000254556	0.94	0.0703	0.126	1
ENSG00000138311	0.938	1.88	0.0452	1
ENSG00000250771	0.938	0.339	0.102	1
ENSG00000279713	0.936	0.566	0.0859	1
ENSG00000260917	0.935	0.761	0.0799	1
ENSG00000114790	0.932	-0.177	0.14	1
ENSG00000171174	0.932	-0.177	0.14	1
ENSG00000173698	0.932	-0.177	0.14	1
ENSG00000205464	0.932	-0.177	0.14	1
ENSG00000258311	0.932	-0.177	0.14	1
ENSG00000117707	0.931	0.137	0.119	1
ENSG00000143776	0.931	0.395	0.0974	1
ENSG00000262877	0.931	0.395	0.0974	1
ENSG00000081148	0.922	-0.0981	0.165	1
ENSG00000113327	0.922	-0.0981	0.165	1
ENSG00000235066	0.917	0.5	0.0894	1
ENSG00000233178	0.915	0.921	0.0775	1
ENSG00000272933	0.914	0.748	0.0883	1
ENSG00000169627	0.912	0.55	0.0859	1
ENSG00000204104	0.908	1.78	0.0563	1
ENSG00000186654	0.906	0.598	0.11	1
ENSG00000188451	0.906	0.598	0.11	1
ENSG00000272841	0.905	0.0481	0.145	1
ENSG00000240809	0.904	0.831	0.0908	1
ENSG00000167840	0.902	1.21	0.0718	1
ENSG00000166503	0.901	0.645	0.106	1
ENSG00000218426	0.901	1.36	0.0641	1
ENSG00000228672	0.9	0.87	0.0878	1
ENSG00000154330	0.897	0.116	0.136	1
ENSG00000171757	0.897	0.116	0.136	1
ENSG00000177337	0.897	0.431	0.105	1
ENSG00000203721	0.897	0.431	0.105	1
ENSG00000253687	0.897	0.116	0.136	1
ENSG00000280010	0.897	0.431	0.105	1
ENSG00000234996	0.89	-0.204	0.164	1
ENSG00000129353	0.888	1.5	0.0696	1
ENSG00000197782	0.886	1.52	0.0682	1
ENSG00000166532	0.88	2.06	0.0556	1
ENSG00000275457	0.875	-0.0469	0.178	1
ENSG00000161664	0.874	0.676	0.112	1
ENSG00000260924	0.874	0.935	0.0901	1
ENSG00000177989	0.873	1.34	0.074	1
ENSG00000237424	0.872	1.94	0.0633	1
ENSG00000104047	0.861	2.3	0.0572	1
ENSG00000198908	0.858	0.16	0.147	1
ENSG00000281896	0.858	0.16	0.147	1
ENSG00000075643	0.857	0.567	0.136	1
ENSG00000101977	0.857	0.567	0.136	1
ENSG00000137270	0.857	1.36	0.0777	1
ENSG00000279522	0.857	0.567	0.136	1
ENSG00000187791	0.853	2.31	0.0631	1
ENSG00000250033	0.853	2.51	0.0579	1
ENSG00000255198	0.853	0.223	0.138	1
ENSG00000258056	0.853	0.223	0.138	1
ENSG00000141542	0.851	0.661	0.124	1
ENSG00000260382	0.848	0.706	0.119	1
ENSG00000138639	0.845	0.749	0.114	1
ENSG00000183914	0.845	-0.231	0.164	1
ENSG00000197013	0.845	-0.231	0.164	1
ENSG00000250138	0.842	0.397	0.133	1
ENSG00000113790	0.841	1.13	0.101	1
ENSG00000232811	0.84	-0.149	0.222	1
ENSG00000182168	0.838	0.45	0.126	1
ENSG00000249459	0.832	0.552	0.136	1
ENSG00000273748	0.83	0.6	0.144	1
ENSG00000205643	0.825	1.43	0.0926	1
ENSG00000108641	0.824	0.139	0.167	1
ENSG00000182310	0.824	0.139	0.167	1
ENSG00000236867	0.824	0.139	0.167	1
ENSG00000128596	0.823	0.736	0.126	1
ENSG00000280206	0.821	1.77	0.0847	1
ENSG00000137473	0.819	0.819	0.116	1
ENSG00000169282	0.817	0.859	0.122	1
ENSG00000279145	0.816	0.898	0.118	1
ENSG00000206535	0.815	0.323	0.158	1
ENSG00000218565	0.811	0.433	0.142	1
ENSG00000256092	0.807	0.536	0.151	1
ENSG00000100288	0.805	0.585	0.159	1
ENSG00000162415	0.805	0.585	0.159	1
ENSG00000230629	0.805	1.6	0.0892	1
ENSG00000263535	0.804	0.632	0.152	1
ENSG00000226329	0.799	0.765	0.133	1
ENSG00000115109	0.798	0.806	0.127	1
ENSG00000117090	0.797	-0.175	0.256	1
ENSG00000168427	0.797	-0.175	0.256	1
ENSG00000232934	0.797	-0.175	0.256	1
ENSG00000237351	0.797	-0.175	0.256	1
ENSG00000283516	0.797	-0.175	0.256	1
ENSG00000250848	0.795	-0.0956	0.236	1
ENSG00000254912	0.795	-0.0956	0.236	1
ENSG00000159307	0.791	0.0505	0.203	1
ENSG00000216285	0.791	0.0505	0.203	1
ENSG00000271870	0.789	0.118	0.19	1
ENSG00000203950	0.783	0.416	0.158	1
ENSG00000272655	0.783	0.416	0.158	1
ENSG00000203865	0.781	0.52	0.168	1
ENSG00000179988	0.78	0.569	0.159	1
ENSG00000137872	0.774	0.987	0.142	1
ENSG00000281195	0.774	0.987	0.142	1
ENSG00000241837	0.772	4.39	0.0674	1
ENSG00000175003	0.771	1.25	0.117	1
ENSG00000152767	0.769	1.5	0.115	1
ENSG00000152952	0.767	1.8	0.104	1
ENSG00000168016	0.762	2.7	0.0892	1
ENSG00000105193	0.76	3.67	0.0777	1
ENSG00000240053	0.756	1.21	0.13	1
ENSG00000265206	0.756	1.59	0.11	1
ENSG00000160716	0.755	0.452	0.168	1
ENSG00000171448	0.755	0.78	0.153	1
ENSG00000187187	0.755	0.554	0.176	1
ENSG00000196159	0.755	0.861	0.141	1
ENSG00000226259	0.755	0.78	0.153	1
ENSG00000259924	0.755	0.452	0.168	1
ENSG00000272908	0.755	0.694	0.168	1
ENSG00000279765	0.755	0.694	0.168	1
ENSG00000136206	0.754	0.0279	0.232	1
ENSG00000163702	0.754	0.343	0.188	1
ENSG00000165060	0.754	0.399	0.177	1
ENSG00000213185	0.754	0.343	0.188	1
ENSG00000232860	0.754	0.0968	0.216	1
ENSG00000241429	0.754	0.343	0.188	1
ENSG00000118160	0.753	-0.121	0.271	1
ENSG00000234664	0.753	-0.121	0.271	1
ENSG00000235880	0.753	-0.121	0.271	1
ENSG00000257027	0.753	-0.0444	0.25	1
ENSG00000262049	0.753	-0.0444	0.25	1
ENSG00000111203	0.748	2.13	0.106	1
ENSG00000141753	0.748	2.1	0.105	1
ENSG00000173436	0.746	2.72	0.0941	1
ENSG00000186017	0.745	1.7	0.12	1
ENSG00000187951	0.743	2.4	0.0995	1
ENSG00000196646	0.743	2.38	0.0973	1
ENSG00000112599	0.742	1.38	0.137	1
ENSG00000115539	0.742	2.33	0.103	1
ENSG00000213300	0.741	1.29	0.126	1
ENSG00000234231	0.741	1.29	0.126	1
ENSG00000236675	0.739	1.14	0.149	1
ENSG00000227155	0.738	1.07	0.149	1
ENSG00000133739	0.734	2.68	0.1	1
ENSG00000150991	0.733	0.766	0.167	1
ENSG00000187193	0.732	0.679	0.184	1
ENSG00000100027	0.729	0.538	0.195	1
ENSG00000167525	0.728	0.488	0.206	1
ENSG00000106327	0.727	0.435	0.187	1
ENSG00000270585	0.727	0.435	0.187	1
ENSG00000213693	0.724	0.325	0.21	1
ENSG00000141750	0.723	1.19	0.15	1
ENSG00000183323	0.719	1.59	0.128	1
ENSG00000196118	0.719	0.142	0.228	1
ENSG00000222489	0.717	4.31	0.0901	1
ENSG00000271780	0.717	0.075	0.244	1
ENSG00000155957	0.716	0.914	0.167	1
ENSG00000248483	0.715	0.00503	0.263	1
ENSG00000072952	0.713	-0.0685	0.285	1
ENSG00000100276	0.713	1.36	0.156	1
ENSG00000162878	0.713	-0.0685	0.285	1
ENSG00000278668	0.713	-0.0685	0.285	1
ENSG00000213221	0.712	0.795	0.175	1
ENSG00000236779	0.71	-0.146	0.31	1
ENSG00000236333	0.708	0.665	0.202	1
ENSG00000111801	0.707	1.18	0.161	1
ENSG00000214029	0.706	1.56	0.139	1
ENSG00000109738	0.704	0.571	0.204	1
ENSG00000257621	0.703	3.33	0.105	1
ENSG00000171121	0.702	0.522	0.215	1
ENSG00000172062	0.702	0.522	0.215	1
ENSG00000221843	0.702	1.05	0.173	1
ENSG00000176182	0.7	0.471	0.228	1
ENSG00000198974	0.7	1.01	0.18	1
ENSG00000226049	0.7	0.471	0.228	1
ENSG00000075407	0.698	2.63	0.115	1
ENSG00000162552	0.698	0.418	0.208	1
ENSG00000212664	0.698	0.418	0.208	1
ENSG00000207088	0.696	1.6	0.152	1
ENSG00000213859	0.694	0.863	0.174	1
ENSG00000108448	0.693	0.307	0.235	1
ENSG00000124019	0.693	0.307	0.235	1
ENSG00000271789	0.693	0.307	0.235	1
ENSG00000243725	0.692	1.2	0.166	1
ENSG00000153574	0.691	2.71	0.119	1
ENSG00000092421	0.69	1.73	0.145	1
ENSG00000125531	0.69	0.247	0.224	1
ENSG00000180035	0.69	0.781	0.191	1
ENSG00000272872	0.69	0.781	0.191	1
ENSG00000168569	0.688	1.68	0.152	1
ENSG00000280388	0.688	0.739	0.2	1
ENSG00000102385	0.684	0.65	0.222	1
ENSG00000162631	0.684	0.121	0.257	1
ENSG00000229897	0.684	0.121	0.257	1
ENSG00000241506	0.683	2.55	0.128	1
ENSG00000140006	0.682	2.65	0.13	1
ENSG00000207445	0.682	4.19	0.107	1
ENSG00000100890	0.681	1.76	0.145	1
ENSG00000134901	0.681	0.604	0.213	1
ENSG00000078098	0.68	2.25	0.14	1
ENSG00000230368	0.68	0.0528	0.277	1
ENSG00000270127	0.68	0.0528	0.277	1
ENSG00000273033	0.68	0.965	0.203	1
ENSG00000111879	0.679	1.25	0.166	1
ENSG00000279406	0.679	1.25	0.166	1
ENSG00000111788	0.678	0.556	0.225	1
ENSG00000083828	0.675	2.15	0.142	1
ENSG00000197258	0.675	0.889	0.182	1
ENSG00000119147	0.673	0.85	0.19	1
ENSG00000157657	0.673	1.16	0.185	1
ENSG00000180747	0.673	2.95	0.124	1
ENSG00000129757	0.672	0.454	0.252	1
ENSG00000015413	0.671	-0.0931	0.325	1
ENSG00000136695	0.671	-0.0931	0.325	1
ENSG00000179344	0.671	1.58	0.169	1
ENSG00000232940	0.671	-0.0931	0.325	1
ENSG00000105072	0.67	1.76	0.152	1
ENSG00000143630	0.669	0.401	0.231	1
ENSG00000145824	0.669	0.401	0.231	1
ENSG00000179163	0.669	3.03	0.125	1
ENSG00000148225	0.666	-0.172	0.31	1
ENSG00000257086	0.666	-0.172	0.31	1
ENSG00000196074	0.663	1.81	0.168	1
ENSG00000214954	0.663	1.24	0.178	1
ENSG00000102053	0.662	0.681	0.23	1
ENSG00000117791	0.662	0.99	0.21	1
ENSG00000249353	0.662	1.94	0.156	1
ENSG00000140993	0.661	0.288	0.263	1
ENSG00000068615	0.659	0.636	0.243	1
ENSG00000118997	0.659	0.636	0.243	1
ENSG00000163132	0.659	0.636	0.243	1
ENSG00000058056	0.657	2.34	0.146	1
ENSG00000104147	0.657	0.915	0.229	1
ENSG00000111850	0.657	1.87	0.164	1
ENSG00000175874	0.652	0.54	0.247	1
ENSG00000054392	0.651	1.08	0.2	1
ENSG00000135249	0.651	4.43	0.123	1
ENSG00000152213	0.651	1.08	0.2	1
ENSG00000184319	0.65	2.82	0.141	1
ENSG00000123444	0.649	2.87	0.144	1
ENSG00000133026	0.649	1.26	0.183	1
ENSG00000275202	0.648	0.49	0.262	1
ENSG00000149294	0.647	1.42	0.186	1
ENSG00000207008	0.647	1.23	0.19	1
ENSG00000164904	0.646	1.72	0.173	1
ENSG00000189045	0.645	0.754	0.227	1
ENSG00000136938	0.644	2.27	0.159	1
ENSG00000170647	0.644	0.438	0.278	1
ENSG00000178789	0.644	1.2	0.197	1
ENSG00000167772	0.643	0.978	0.226	1
ENSG00000224687	0.643	0.978	0.226	1
ENSG00000101230	0.642	1.8	0.184	1
ENSG00000105982	0.642	1.17	0.204	1
ENSG00000236603	0.642	0.0303	0.313	1
ENSG00000152217	0.639	2	0.163	1
ENSG00000159450	0.639	0.383	0.257	1
ENSG00000106689	0.637	0.903	0.221	1
ENSG00000189369	0.637	2.72	0.148	1
ENSG00000229431	0.637	1.61	0.188	1
ENSG00000277998	0.637	0.903	0.221	1
ENSG00000100058	0.635	2.06	0.173	1
ENSG00000225178	0.635	2.7	0.152	1
ENSG00000164087	0.633	1.69	0.186	1
ENSG00000177469	0.633	1.25	0.196	1
ENSG00000175198	0.632	3.24	0.146	1
ENSG00000051180	0.631	2.11	0.169	1
ENSG00000134242	0.63	0.573	0.256	1
ENSG00000165996	0.63	0.824	0.224	1
ENSG00000175697	0.63	0.573	0.256	1
ENSG00000197191	0.629	0.269	0.263	1
ENSG00000008311	0.628	-0.118	0.369	1
ENSG00000115556	0.628	1.51	0.195	1
ENSG00000152076	0.628	-0.118	0.369	1
ENSG00000166086	0.628	1.19	0.211	1
ENSG00000089123	0.627	1.63	0.192	1
ENSG00000234191	0.626	2.31	0.165	1
ENSG00000129197	0.624	1.83	0.192	1
ENSG00000181523	0.624	2.57	0.161	1
ENSG00000187097	0.624	2.44	0.167	1
ENSG00000165507	0.623	0.208	0.281	1
ENSG00000214960	0.623	0.208	0.281	1
ENSG00000224411	0.623	2.69	0.161	1
ENSG00000259820	0.623	0.208	0.281	1
ENSG00000164406	0.622	1.81	0.197	1
ENSG00000169715	0.622	1.13	0.213	1
ENSG00000165521	0.62	0.473	0.288	1
ENSG00000203778	0.62	0.473	0.288	1
ENSG00000224699	0.62	2.25	0.177	1
ENSG00000236017	0.62	0.473	0.288	1
ENSG00000139668	0.619	3.3	0.153	1
ENSG00000159259	0.619	2.24	0.174	1
ENSG00000267023	0.619	1.66	0.201	1
ENSG00000163535	0.618	3.21	0.155	1
ENSG00000198521	0.618	0.697	0.26	1
ENSG00000223546	0.618	0.697	0.26	1
ENSG00000136098	0.617	1.24	0.209	1
ENSG00000137142	0.617	0.144	0.302	1
ENSG00000115526	0.615	2.72	0.163	1
ENSG00000127423	0.615	2.35	0.176	1
ENSG00000119686	0.614	1.93	0.19	1
ENSG00000179943	0.612	2.08	0.187	1
ENSG00000072422	0.61	0.0774	0.326	1
ENSG00000124098	0.61	2.06	0.191	1
ENSG00000204536	0.61	2.06	0.191	1
ENSG00000215319	0.61	0.0774	0.326	1
ENSG00000008441	0.609	0.366	0.285	1
ENSG00000109063	0.609	0.366	0.285	1
ENSG00000126953	0.609	2.42	0.175	1
ENSG00000154639	0.609	1.57	0.215	1
ENSG00000225159	0.609	0.366	0.285	1
ENSG00000159915	0.608	0.606	0.266	1
ENSG00000081052	0.607	1.15	0.234	1
ENSG00000131067	0.607	1.15	0.234	1
ENSG00000126822	0.606	2.19	0.191	1
ENSG00000166263	0.605	2.38	0.184	1
ENSG00000076003	0.604	4.58	0.151	1
ENSG00000155542	0.604	0.955	0.262	1
ENSG00000236753	0.603	0.309	0.305	1
ENSG00000118308	0.602	2.35	0.185	1
ENSG00000272325	0.602	1.72	0.205	1
ENSG00000124508	0.601	2.52	0.184	1
ENSG00000280213	0.601	1.5	0.207	1
ENSG00000143919	0.6	0.917	0.275	1
ENSG00000176406	0.6	2.57	0.178	1
ENSG00000268350	0.6	0.917	0.275	1
ENSG00000269378	0.6	1.79	0.207	1
ENSG00000126453	0.599	2.9	0.174	1
ENSG00000228013	0.599	2.77	0.178	1
ENSG00000100197	0.598	0.508	0.298	1
ENSG00000208892	0.597	3.81	0.163	1
ENSG00000204116	0.596	1.05	0.247	1
ENSG00000215458	0.596	0.249	0.293	1
ENSG00000260279	0.596	0.249	0.293	1
ENSG00000205744	0.595	2.29	0.189	1
ENSG00000135205	0.594	-0.066	0.383	1
ENSG00000141294	0.594	-0.066	0.383	1
ENSG00000163584	0.594	4.82	0.157	1
ENSG00000257176	0.594	-0.066	0.383	1
ENSG00000275180	0.594	0.683	0.284	1
ENSG00000280414	0.594	1.17	0.241	1
ENSG00000151611	0.593	2.89	0.18	1
ENSG00000188848	0.592	1.02	0.258	1
ENSG00000204618	0.592	0.456	0.317	1
ENSG00000259529	0.592	0.456	0.317	1
ENSG00000170089	0.591	1.81	0.211	1
ENSG00000196562	0.591	0.839	0.251	1
ENSG00000197959	0.591	3.42	0.17	1
ENSG00000145217	0.59	2.25	0.193	1
ENSG00000152433	0.59	1.14	0.234	1
ENSG00000268670	0.59	1.14	0.234	1
ENSG00000100342	0.589	1.6	0.225	1
ENSG00000153956	0.589	0.188	0.315	1
ENSG00000260317	0.589	0.188	0.315	1
ENSG00000279191	0.589	1.39	0.235	1
ENSG00000106144	0.588	3.15	0.178	1
ENSG00000137818	0.588	6.72	0.155	1
ENSG00000177173	0.588	0.637	0.275	1
ENSG00000251034	0.588	0.637	0.275	1
ENSG00000182903	0.587	2.56	0.189	1
ENSG00000040199	0.586	3.88	0.168	1
ENSG00000104714	0.586	2.6	0.19	1
ENSG00000157999	0.586	0.798	0.264	1
ENSG00000158023	0.586	0.798	0.264	1
ENSG00000188735	0.586	1.58	0.231	1
ENSG00000001461	0.585	3.28	0.18	1
ENSG00000226055	0.585	0.403	0.337	1
ENSG00000233384	0.585	0.403	0.337	1
ENSG00000267265	0.585	0.403	0.337	1
ENSG00000142765	0.584	-0.143	0.369	1
ENSG00000149609	0.584	-0.143	0.369	1
ENSG00000241127	0.584	2.43	0.192	1
ENSG00000136943	0.583	2.36	0.203	1
ENSG00000141252	0.582	3.66	0.175	1
ENSG00000156172	0.582	0.59	0.291	1
ENSG00000187229	0.582	0.59	0.291	1
ENSG00000242294	0.582	0.59	0.291	1
ENSG00000259494	0.582	2.05	0.206	1
ENSG00000128271	0.581	0.123	0.339	1
ENSG00000224892	0.581	0.123	0.339	1
ENSG00000087510	0.58	0.756	0.278	1
ENSG00000119650	0.58	2.09	0.209	1
ENSG00000152253	0.58	1.19	0.247	1
ENSG00000154262	0.58	1.53	0.246	1
ENSG00000172575	0.58	2.23	0.204	1
ENSG00000185621	0.579	2.97	0.188	1
ENSG00000235609	0.579	1.7	0.225	1
ENSG00000240024	0.579	1.62	0.229	1
ENSG00000204822	0.578	0.348	0.316	1
ENSG00000236493	0.578	1.41	0.241	1
ENSG00000269983	0.578	0.348	0.316	1
ENSG00000074370	0.577	2.72	0.197	1
ENSG00000163399	0.577	6.74	0.163	1
ENSG00000177082	0.577	2.14	0.203	1
ENSG00000129521	0.576	0.542	0.308	1
ENSG00000267244	0.576	1.16	0.257	1
ENSG00000168939	0.575	0.713	0.293	1
ENSG00000167701	0.573	1	0.277	1
ENSG00000196975	0.573	4.67	0.172	1
ENSG00000103490	0.572	2.8	0.193	1
ENSG00000134297	0.572	2.33	0.21	1
ENSG00000107954	0.571	0.29	0.305	1
ENSG00000176919	0.571	1.45	0.238	1
ENSG00000123700	0.57	1.55	0.251	1
ENSG00000223855	0.57	0.492	0.327	1
ENSG00000109667	0.569	2.69	0.201	1
ENSG00000146592	0.569	0.826	0.272	1
ENSG00000213212	0.569	0.826	0.272	1
ENSG00000233695	0.569	0.668	0.309	1
ENSG00000259431	0.569	1.94	0.215	1
ENSG00000188042	0.568	2.13	0.211	1
ENSG00000173166	0.567	2.8	0.197	1
ENSG00000165185	0.566	2.54	0.209	1
ENSG00000164687	0.563	5.32	0.177	1
ENSG00000203855	0.563	1.06	0.272	1
ENSG00000233058	0.563	0.623	0.3	1
ENSG00000233762	0.563	0.623	0.3	1
ENSG00000267680	0.563	3.01	0.203	1
ENSG00000278922	0.563	0.623	0.3	1
ENSG00000166863	0.562	0.23	0.326	1
ENSG00000170315	0.562	0.23	0.326	1
ENSG00000228668	0.562	-0.0158	0.397	1
ENSG00000235677	0.562	0.23	0.326	1
ENSG00000238363	0.562	-0.0158	0.397	1
ENSG00000241547	0.562	0.23	0.326	1
ENSG00000279010	0.562	0.23	0.326	1
ENSG00000178425	0.561	1.65	0.239	1
ENSG00000130038	0.56	1.47	0.244	1
ENSG00000168813	0.56	3.36	0.196	1
ENSG00000274349	0.56	2.3	0.215	1
ENSG00000105514	0.559	1.15	0.257	1
ENSG00000044574	0.558	8.1	0.176	1
ENSG00000137693	0.558	2.73	0.209	1
ENSG00000151743	0.558	1.86	0.237	1
ENSG00000182612	0.558	0.893	0.296	1
ENSG00000188277	0.558	0.893	0.296	1
ENSG00000204253	0.558	1.03	0.284	1
ENSG00000260276	0.558	1.03	0.284	1
ENSG00000087338	0.557	3.18	0.2	1
ENSG00000114013	0.556	0.575	0.317	1
ENSG00000257337	0.556	0.575	0.317	1
ENSG00000174928	0.555	0.385	0.327	1
ENSG00000105963	0.553	0.993	0.297	1
ENSG00000134245	0.553	2.2	0.231	1
ENSG00000170006	0.553	1.42	0.261	1
ENSG00000172828	0.553	0.167	0.351	1
ENSG00000248643	0.553	0.167	0.351	1
ENSG00000136848	0.552	0.853	0.28	1
ENSG00000240445	0.552	1.32	0.268	1
ENSG00000268471	0.552	0.853	0.28	1
ENSG00000182326	0.551	-0.0905	0.432	1
ENSG00000185261	0.551	1.58	0.261	1
ENSG00000197841	0.551	2.52	0.218	1
ENSG00000236269	0.551	-0.0905	0.432	1
ENSG00000249947	0.551	-0.0905	0.432	1
ENSG00000174804	0.55	1.8	0.245	1
ENSG00000127081	0.549	3.23	0.203	1
ENSG00000166997	0.549	1.09	0.279	1
ENSG00000131242	0.548	2.46	0.224	1
ENSG00000115271	0.547	2.3	0.236	1
ENSG00000171951	0.547	0.329	0.349	1
ENSG00000173480	0.547	1.98	0.249	1
ENSG00000185338	0.547	0.329	0.349	1
ENSG00000226415	0.547	0.329	0.349	1
ENSG00000233184	0.547	2.21	0.234	1
ENSG00000122733	0.546	2.25	0.228	1
ENSG00000233337	0.543	0.101	0.379	1
ENSG00000255050	0.543	0.101	0.379	1
ENSG00000273306	0.543	0.101	0.379	1
ENSG00000165178	0.542	1.82	0.25	1
ENSG00000182919	0.541	1.94	0.237	1
ENSG00000231731	0.541	1.14	0.274	1
ENSG00000249252	0.541	0.475	0.358	1
ENSG00000102221	0.54	0.771	0.31	1
ENSG00000183091	0.54	4.01	0.202	1
ENSG00000197779	0.54	3.12	0.216	1
ENSG00000147166	0.539	1.02	0.304	1
ENSG00000257511	0.537	0.271	0.338	1
ENSG00000261716	0.537	2.51	0.231	1
ENSG00000020426	0.535	3.38	0.213	1
ENSG00000156374	0.535	3.03	0.224	1
ENSG00000102931	0.534	1.55	0.284	1
ENSG00000153162	0.534	3.05	0.221	1
ENSG00000104369	0.532	2.35	0.241	1
ENSG00000149636	0.532	3.54	0.217	1
ENSG00000166582	0.532	1.45	0.272	1
ENSG00000182923	0.532	3.6	0.217	1
ENSG00000212464	0.532	3.5	0.216	1
ENSG00000099284	0.531	1.81	0.261	1
ENSG00000099330	0.531	1.08	0.298	1
ENSG00000103021	0.531	1.08	0.298	1
ENSG00000169105	0.531	1.28	0.295	1
ENSG00000172936	0.53	2.33	0.245	1
ENSG00000134962	0.529	1.35	0.28	1
ENSG00000163393	0.529	3.45	0.218	1
ENSG00000163406	0.529	2.03	0.254	1
ENSG00000241361	0.529	1.86	0.262	1
ENSG00000101190	0.528	2.6	0.238	1
ENSG00000160094	0.528	1.43	0.281	1
ENSG00000172878	0.527	1.65	0.268	1
ENSG00000087301	0.526	3.08	0.23	1
ENSG00000188001	0.526	1.71	0.269	1
ENSG00000105877	0.525	2.43	0.249	1
ENSG00000083720	0.524	3.37	0.224	1
ENSG00000228663	0.524	0.368	0.36	1
ENSG00000242338	0.524	0.368	0.36	1
ENSG00000265148	0.524	0.8	0.318	1
ENSG00000111665	0.523	1.63	0.276	1
ENSG00000122481	0.523	1.13	0.293	1
ENSG00000188152	0.523	1.13	0.293	1
ENSG00000117174	0.521	3.69	0.223	1
ENSG00000012174	0.52	3.14	0.233	1
ENSG00000138640	0.52	-0.0394	0.445	1
ENSG00000164197	0.52	-0.0394	0.445	1
ENSG00000169925	0.52	2.18	0.256	1
ENSG00000246273	0.52	-0.0394	0.445	1
ENSG00000276535	0.52	-0.0394	0.445	1
ENSG00000156042	0.519	2.93	0.239	1
ENSG00000256625	0.519	0.639	0.336	1
ENSG00000263934	0.519	9.92	0.207	1
ENSG00000196357	0.518	1.1	0.305	1
ENSG00000144355	0.517	0.146	0.391	1
ENSG00000147364	0.517	2.83	0.24	1
ENSG00000198040	0.517	3.64	0.231	1
ENSG00000201558	0.517	0.146	0.391	1
ENSG00000213600	0.517	0.146	0.391	1
ENSG00000235486	0.517	0.146	0.391	1
ENSG00000265415	0.517	0.146	0.391	1
ENSG00000180011	0.516	2.56	0.256	1
ENSG00000157514	0.514	3.08	0.241	1
ENSG00000205238	0.514	0.311	0.349	1
ENSG00000150672	0.513	0.97	0.341	1
ENSG00000166529	0.512	1.82	0.276	1
ENSG00000214110	0.512	2.65	0.25	1
ENSG00000234500	0.512	0.458	0.392	1
ENSG00000234684	0.512	0.458	0.392	1
ENSG00000256537	0.512	2.31	0.266	1
ENSG00000119771	0.511	2.93	0.246	1
ENSG00000169604	0.51	1.24	0.325	1
ENSG00000173221	0.51	2.67	0.249	1
ENSG00000174672	0.51	0.592	0.356	1
ENSG00000178093	0.51	1.68	0.277	1
ENSG00000077009	0.509	0.715	0.354	1
ENSG00000103351	0.509	2.37	0.257	1
ENSG00000182362	0.509	2.72	0.253	1
ENSG00000243302	0.509	0.715	0.354	1
ENSG00000111602	0.508	3.45	0.242	1
ENSG00000151006	0.508	0.828	0.326	1
ENSG00000183386	0.508	1.39	0.307	1
ENSG00000113108	0.507	1.53	0.298	1
ENSG00000248927	0.507	-0.115	0.485	1
ENSG00000080824	0.506	8.84	0.219	1
ENSG00000179151	0.506	3.46	0.243	1
ENSG00000183631	0.506	1.03	0.333	1
ENSG00000106785	0.505	3.19	0.244	1
ENSG00000116586	0.505	5.09	0.227	1
ENSG00000163082	0.505	1.21	0.338	1
ENSG00000164167	0.505	3.59	0.241	1
ENSG00000138363	0.504	2.9	0.254	1
ENSG00000174233	0.504	2.63	0.254	1
ENSG00000213123	0.504	1.29	0.319	1
ENSG00000148120	0.503	1.51	0.308	1
ENSG00000136367	0.502	0.544	0.377	1
ENSG00000162892	0.502	0.544	0.377	1
ENSG00000180354	0.502	3.4	0.247	1
ENSG00000152229	0.501	2.33	0.272	1
ENSG00000166523	0.501	1.81	0.288	1
ENSG00000216480	0.501	3.23	0.252	1
ENSG00000174529	0.499	2.87	0.256	1
ENSG00000197852	0.499	1.18	0.325	1
ENSG00000234420	0.499	2.35	0.27	1
ENSG00000261371	0.499	6.06	0.228	1
ENSG00000154310	0.498	3.71	0.245	1
ENSG00000115947	0.497	3.58	0.249	1
ENSG00000072756	0.496	3.49	0.249	1
ENSG00000125863	0.496	2.45	0.273	1
ENSG00000100442	0.494	3.31	0.257	1
ENSG00000203760	0.494	3.37	0.251	1
ENSG00000153790	0.493	0.958	0.365	1
ENSG00000170837	0.493	0.624	0.365	1
ENSG00000236534	0.493	0.855	0.368	1
ENSG00000256223	0.493	1.38	0.324	1
ENSG00000272983	0.493	1.14	0.319	1
ENSG00000134874	0.492	2.74	0.267	1
ENSG00000137857	0.492	0.0099	0.458	1
ENSG00000167220	0.492	0.0099	0.458	1
ENSG00000186056	0.492	0.0099	0.458	1
ENSG00000215146	0.492	0.0099	0.458	1
ENSG00000230207	0.492	0.0099	0.458	1
ENSG00000244124	0.492	0.0099	0.458	1
ENSG00000260097	0.492	0.19	0.403	1
ENSG00000130783	0.491	2.19	0.281	1
ENSG00000080493	0.49	1.75	0.314	1
ENSG00000273611	0.49	4.2	0.245	1
ENSG00000224631	0.489	1.57	0.324	1
ENSG00000115514	0.488	4.85	0.243	1
ENSG00000144645	0.487	1.2	0.359	1
ENSG00000253293	0.485	1.73	0.323	1
ENSG00000059769	0.484	2.49	0.284	1
ENSG00000080823	0.484	1.97	0.298	1
ENSG00000196696	0.484	1.47	0.313	1
ENSG00000196873	0.484	1.54	0.318	1
ENSG00000155093	0.483	2.31	0.295	1
ENSG00000164815	0.483	3.36	0.263	1
ENSG00000230863	0.482	0.442	0.428	1
ENSG00000099904	0.481	2.37	0.285	1
ENSG00000145247	0.481	1.71	0.3	1
ENSG00000150593	0.481	4.13	0.257	1
ENSG00000169955	0.481	0.292	0.386	1
ENSG00000198691	0.481	0.292	0.386	1
ENSG00000069966	0.48	1.08	0.347	1
ENSG00000226419	0.48	1.08	0.347	1
ENSG00000139998	0.479	2.43	0.294	1
ENSG00000186767	0.479	0.125	0.434	1
ENSG00000248100	0.479	0.125	0.434	1
ENSG00000096093	0.478	2.52	0.285	1
ENSG00000108666	0.478	2.75	0.278	1
ENSG00000116205	0.478	3.19	0.27	1
ENSG00000196912	0.477	2.2	0.294	1
ENSG00000248529	0.477	-0.0635	0.498	1
ENSG00000152377	0.476	3.74	0.268	1
ENSG00000156253	0.476	2.72	0.281	1
ENSG00000164136	0.476	1.62	0.323	1
ENSG00000196550	0.476	0.656	0.374	1
ENSG00000251003	0.476	1.22	0.365	1
ENSG00000197885	0.475	2.06	0.299	1
ENSG00000114646	0.474	0.528	0.411	1
ENSG00000119866	0.474	2.22	0.301	1
ENSG00000158417	0.474	5.03	0.258	1
ENSG00000255823	0.474	2.02	0.31	1
ENSG00000260852	0.474	1.04	0.363	1
ENSG00000032742	0.473	2.18	0.3	1
ENSG00000144821	0.473	1.92	0.322	1
ENSG00000056050	0.472	2.29	0.301	1
ENSG00000108797	0.472	0.946	0.365	1
ENSG00000120051	0.472	2.95	0.282	1
ENSG00000121864	0.472	2.95	0.282	1
ENSG00000166839	0.472	0.946	0.365	1
ENSG00000226887	0.472	0.388	0.457	1
ENSG00000233559	0.472	1.35	0.337	1
ENSG00000002933	0.471	0.842	0.395	1
ENSG00000126861	0.471	1.27	0.357	1
ENSG00000127995	0.471	2.39	0.291	1
ENSG00000149260	0.471	1.27	0.357	1
ENSG00000167965	0.471	3.15	0.281	1
ENSG00000261342	0.471	0.842	0.395	1
ENSG00000278637	0.471	1.53	0.334	1
ENSG00000139154	0.47	2.16	0.307	1
ENSG00000143971	0.47	2.45	0.3	1
ENSG00000074855	0.469	1.9	0.314	1
ENSG00000165899	0.469	0.232	0.414	1
ENSG00000129317	0.468	3.48	0.276	1
ENSG00000171658	0.468	1.64	0.328	1
ENSG00000188906	0.468	1.1	0.354	1
ENSG00000236383	0.468	2.34	0.305	1
ENSG00000131470	0.467	2.78	0.293	1
ENSG00000118420	0.466	2.26	0.314	1
ENSG00000145888	0.466	0.0576	0.47	1
ENSG00000186399	0.466	0.0576	0.47	1
ENSG00000216895	0.466	0.0576	0.47	1
ENSG00000240476	0.466	1.51	0.346	1
ENSG00000261455	0.466	0.0576	0.47	1
ENSG00000264769	0.466	0.0576	0.47	1
ENSG00000139675	0.465	0.908	0.383	1
ENSG00000177855	0.465	2.32	0.311	1
ENSG00000162396	0.464	2.88	0.297	1
ENSG00000133740	0.463	1.16	0.346	1
ENSG00000174564	0.463	1.16	0.346	1
ENSG00000179743	0.463	0.477	0.437	1
ENSG00000215154	0.463	1.61	0.339	1
ENSG00000263753	0.463	2.09	0.307	1
ENSG00000138606	0.462	1.91	0.334	1
ENSG00000139725	0.462	0.802	0.379	1
ENSG00000161835	0.461	1.07	0.37	1
ENSG00000006837	0.46	0.331	0.397	1
ENSG00000172765	0.46	3.37	0.291	1
ENSG00000177383	0.46	1.48	0.358	1
ENSG00000198464	0.46	1.48	0.358	1
ENSG00000203667	0.459	2.81	0.303	1
ENSG00000164124	0.458	2.25	0.324	1
ENSG00000165632	0.458	3.22	0.297	1
ENSG00000186812	0.458	2.45	0.311	1
ENSG00000114388	0.457	2.51	0.308	1
ENSG00000143578	0.457	1.53	0.351	1
ENSG00000155330	0.457	2.8	0.3	1
ENSG00000176396	0.457	1.98	0.326	1
ENSG00000108309	0.456	0.169	0.446	1
ENSG00000114853	0.456	2.56	0.309	1
ENSG00000130940	0.456	0.869	0.403	1
ENSG00000145757	0.456	0.561	0.42	1
ENSG00000274180	0.454	1.03	0.387	1
ENSG00000163933	0.453	4.39	0.283	1
ENSG00000196569	0.453	2.52	0.311	1
ENSG00000280077	0.453	0.76	0.4	1
ENSG00000109099	0.452	2.48	0.311	1
ENSG00000141013	0.452	1.5	0.363	1
ENSG00000272072	0.452	0.424	0.466	1
ENSG00000082074	0.45	1.85	0.331	1
ENSG00000107679	0.45	-0.0133	0.51	1
ENSG00000123352	0.45	1.09	0.377	1
ENSG00000162438	0.45	0.641	0.405	1
ENSG00000173320	0.45	0.641	0.405	1
ENSG00000181322	0.45	-0.0133	0.51	1
ENSG00000229598	0.45	-0.0133	0.51	1
ENSG00000250295	0.45	-0.0133	0.51	1
ENSG00000112167	0.449	3.36	0.3	1
ENSG00000232573	0.449	3.1	0.301	1
ENSG00000073605	0.448	0.829	0.424	1
ENSG00000126524	0.448	6.06	0.279	1
ENSG00000146038	0.448	0.829	0.424	1
ENSG00000171189	0.447	1.74	0.361	1
ENSG00000180071	0.447	1.97	0.338	1
ENSG00000242111	0.447	0.273	0.425	1
ENSG00000116675	0.446	2.51	0.319	1
ENSG00000121858	0.446	0.996	0.405	1
ENSG00000128000	0.446	0.996	0.405	1
ENSG00000128965	0.446	0.996	0.405	1
ENSG00000050730	0.445	0.512	0.447	1
ENSG00000260219	0.445	1.92	0.352	1
ENSG00000105865	0.444	1.28	0.383	1
ENSG00000035499	0.443	2.78	0.318	1
ENSG00000091651	0.443	3.54	0.304	1
ENSG00000215301	0.443	8.37	0.282	1
ENSG00000163565	0.442	4.46	0.294	1
ENSG00000164008	0.442	1.06	0.394	1
ENSG00000204397	0.442	1.62	0.359	1
ENSG00000125384	0.441	1.81	0.35	1
ENSG00000279081	0.441	0.104	0.482	1
ENSG00000115652	0.44	6.28	0.287	1
ENSG00000154914	0.44	0.37	0.498	1
ENSG00000214575	0.44	0.37	0.498	1
ENSG00000279631	0.44	1.45	0.365	1
ENSG00000006451	0.439	5.21	0.292	1
ENSG00000079337	0.439	0.594	0.429	1
ENSG00000218283	0.439	0.788	0.408	1
ENSG00000251562	0.439	11.9	0.285	1
ENSG00000254685	0.439	2.83	0.318	1
ENSG00000267321	0.439	0.788	0.408	1
ENSG00000279159	0.439	2.96	0.322	1
ENSG00000023839	0.438	1.38	0.367	1
ENSG00000107815	0.438	2.85	0.325	1
ENSG00000121406	0.437	2.63	0.332	1
ENSG00000122912	0.437	2.91	0.32	1
ENSG00000135951	0.437	2.04	0.345	1
ENSG00000138764	0.436	2.65	0.329	1
ENSG00000069943	0.435	2.9	0.325	1
ENSG00000150756	0.435	2.52	0.342	1
ENSG00000182774	0.435	8.57	0.291	1
ENSG00000224078	0.435	4.18	0.304	1
ENSG00000115594	0.434	3.43	0.316	1
ENSG00000140905	0.434	1.17	0.403	1
ENSG00000141441	0.434	0.672	0.414	1
ENSG00000169032	0.434	5.62	0.297	1
ENSG00000215105	0.434	0.857	0.431	1
ENSG00000215817	0.434	1.17	0.403	1
ENSG00000162733	0.433	2.24	0.355	1
ENSG00000197536	0.433	-0.088	0.556	1
ENSG00000233117	0.433	0.212	0.457	1
ENSG00000249242	0.433	0.212	0.457	1
ENSG00000250461	0.433	-0.088	0.556	1
ENSG00000256274	0.433	-0.088	0.556	1
ENSG00000267254	0.433	-0.088	0.556	1
ENSG00000100823	0.431	3.49	0.319	1
ENSG00000182405	0.431	1.22	0.415	1
ENSG00000219481	0.431	3.39	0.318	1
ENSG00000147099	0.43	3.14	0.326	1
ENSG00000213463	0.43	3.7	0.313	1
ENSG00000215039	0.43	0.922	0.418	1
ENSG00000198707	0.429	4.5	0.309	1
ENSG00000235823	0.429	0.746	0.43	1
ENSG00000246695	0.429	0.746	0.43	1
ENSG00000004961	0.428	3.95	0.313	1
ENSG00000106070	0.428	2.69	0.339	1
ENSG00000163285	0.428	0.546	0.456	1
ENSG00000277481	0.428	1.93	0.369	1
ENSG00000034713	0.427	5.17	0.306	1
ENSG00000061337	0.427	0.313	0.436	1
ENSG00000111802	0.427	4.56	0.31	1
ENSG00000171714	0.427	1.75	0.381	1
ENSG00000181004	0.427	2.04	0.357	1
ENSG00000186834	0.427	5.17	0.306	1
ENSG00000111276	0.426	3.56	0.323	1
ENSG00000273066	0.426	0.984	0.432	1
ENSG00000273270	0.426	0.984	0.432	1
ENSG00000186448	0.425	3.72	0.323	1
ENSG00000260075	0.425	2.3	0.35	1
ENSG00000265790	0.425	0.0352	0.522	1
ENSG00000279187	0.425	0.0352	0.522	1
ENSG00000185252	0.424	2.17	0.357	1
ENSG00000068784	0.423	3.36	0.329	1
ENSG00000101197	0.423	1.48	0.399	1
ENSG00000224138	0.423	0.626	0.438	1
ENSG00000122970	0.422	1.94	0.373	1
ENSG00000171467	0.422	6.04	0.308	1
ENSG00000212402	0.422	2.28	0.357	1
ENSG00000265479	0.422	1.04	0.419	1
ENSG00000155636	0.421	2.8	0.34	1
ENSG00000148426	0.419	1.1	0.407	1
ENSG00000105983	0.418	4.46	0.323	1
ENSG00000124731	0.418	1.57	0.383	1
ENSG00000244509	0.418	1.29	0.411	1
ENSG00000272686	0.418	0.149	0.493	1
ENSG00000100348	0.417	3.47	0.334	1
ENSG00000146282	0.417	5.4	0.316	1
ENSG00000131269	0.416	4.11	0.327	1
ENSG00000215256	0.416	0.496	0.485	1
ENSG00000232504	0.416	1.16	0.427	1
ENSG00000109534	0.415	0.775	0.438	1
ENSG00000198056	0.415	1.98	0.371	1
ENSG00000137601	0.414	2.76	0.355	1
ENSG00000196218	0.414	1.65	0.386	1
ENSG00000170417	0.413	0.254	0.468	1
ENSG00000172399	0.413	0.254	0.468	1
ENSG00000180822	0.413	1.39	0.392	1
ENSG00000253210	0.413	0.254	0.468	1
ENSG00000260672	0.413	0.254	0.468	1
ENSG00000264247	0.413	1.54	0.396	1
ENSG00000266777	0.413	0.254	0.468	1
ENSG00000006459	0.412	5.53	0.321	1
ENSG00000101557	0.412	4.84	0.324	1
ENSG00000104332	0.412	0.579	0.465	1
ENSG00000183891	0.412	1.93	0.387	1
ENSG00000137269	0.411	0.844	0.461	1
ENSG00000122417	0.41	2.59	0.355	1
ENSG00000123200	0.41	5.45	0.324	1
ENSG00000123607	0.41	2.97	0.354	1
ENSG00000169508	0.41	2.35	0.365	1
ENSG00000182685	0.41	1.72	0.392	1
ENSG00000186073	0.41	2.07	0.384	1
ENSG00000169245	0.408	1.31	0.417	1
ENSG00000179967	0.408	1.31	0.417	1
ENSG00000214826	0.408	0.658	0.447	1
ENSG00000231365	0.408	0.658	0.447	1
ENSG00000274471	0.408	1.12	0.414	1
ENSG00000139428	0.407	3.68	0.339	1
ENSG00000170835	0.407	-0.037	0.567	1
ENSG00000177359	0.407	-0.037	0.567	1
ENSG00000177646	0.407	4.09	0.338	1
ENSG00000227097	0.407	1.52	0.41	1
ENSG00000253982	0.407	1.52	0.41	1
ENSG00000272419	0.407	-0.037	0.567	1
ENSG00000105750	0.406	1.18	0.433	1
ENSG00000178966	0.406	2.25	0.384	1
ENSG00000226608	0.406	4.22	0.336	1
ENSG00000147586	0.405	0.973	0.432	1
ENSG00000198711	0.405	0.973	0.432	1
ENSG00000100290	0.404	1.41	0.397	1
ENSG00000109674	0.404	2.79	0.362	1
ENSG00000175938	0.404	2.21	0.371	1
ENSG00000183666	0.404	2.49	0.364	1
ENSG00000051382	0.403	4.79	0.337	1
ENSG00000088836	0.403	0.444	0.517	1
ENSG00000110104	0.403	2.88	0.359	1
ENSG00000006757	0.402	2.04	0.386	1
ENSG00000103121	0.402	4.08	0.344	1
ENSG00000234084	0.402	0.0821	0.533	1
ENSG00000171843	0.401	1.64	0.403	1
ENSG00000106080	0.4	3.49	0.355	1
ENSG00000135437	0.4	0.53	0.494	1
ENSG00000154864	0.4	0.53	0.494	1
ENSG00000154874	0.4	1.81	0.398	1
ENSG00000163389	0.4	3.88	0.347	1
ENSG00000174844	0.4	2.19	0.379	1
ENSG00000206634	0.4	1.09	0.432	1
ENSG00000042317	0.399	1.54	0.415	1
ENSG00000134248	0.399	5.25	0.338	1
ENSG00000138795	0.399	0.871	0.469	1
ENSG00000198874	0.399	4.3	0.343	1
ENSG00000003400	0.398	3.3	0.36	1
ENSG00000130653	0.398	1.15	0.451	1
ENSG00000154114	0.397	2.74	0.374	1
ENSG00000234292	0.397	0.192	0.504	1
ENSG00000237418	0.397	0.192	0.504	1
ENSG00000124614	0.396	2.85	0.374	1
ENSG00000130347	0.396	2.29	0.385	1
ENSG00000173933	0.396	1.91	0.412	1
ENSG00000184635	0.396	1.2	0.439	1
ENSG00000189298	0.396	0.611	0.473	1
ENSG00000273151	0.396	0.611	0.473	1
ENSG00000087589	0.395	2.08	0.401	1
ENSG00000112294	0.395	1.62	0.416	1
ENSG00000231991	0.395	4.27	0.352	1
ENSG00000100490	0.394	0.997	0.467	1
ENSG00000114107	0.394	2.34	0.386	1
ENSG00000125375	0.394	0.997	0.467	1
ENSG00000166794	0.394	6.65	0.34	1
ENSG00000171806	0.394	1.97	0.398	1
ENSG00000237513	0.394	0.997	0.467	1
ENSG00000119508	0.393	1.69	0.421	1
ENSG00000119778	0.393	5	0.347	1
ENSG00000145075	0.393	0.688	0.455	1
ENSG00000170558	0.393	3.06	0.368	1
ENSG00000232388	0.393	2.57	0.379	1
ENSG00000250929	0.392	1.06	0.452	1
ENSG00000260898	0.392	1.06	0.452	1
ENSG00000134138	0.391	1.73	0.413	1
ENSG00000147536	0.391	3.41	0.366	1
ENSG00000163219	0.391	2.3	0.388	1
ENSG00000214975	0.391	1.55	0.42	1
ENSG00000122299	0.389	4.7	0.354	1
ENSG00000128805	0.389	1.59	0.429	1
ENSG00000154511	0.389	1.59	0.429	1
ENSG00000162972	0.388	3.07	0.372	1
ENSG00000174953	0.388	5.07	0.352	1
ENSG00000207181	0.388	0.831	0.493	1
ENSG00000214814	0.388	2.4	0.394	1
ENSG00000229932	0.388	0.831	0.493	1
ENSG00000243147	0.388	4.57	0.356	1
ENSG00000248593	0.388	0.831	0.493	1
ENSG00000112782	0.387	0.479	0.526	1
ENSG00000130021	0.387	2.31	0.391	1
ENSG00000162390	0.387	2.76	0.389	1
ENSG00000197608	0.387	2.54	0.392	1
ENSG00000270890	0.387	0.479	0.526	1
ENSG00000279730	0.387	2.01	0.409	1
ENSG00000044459	0.386	3.68	0.364	1
ENSG00000122574	0.386	0.897	0.476	1
ENSG00000127720	0.386	2.07	0.414	1
ENSG00000152464	0.386	2.22	0.404	1
ENSG00000196152	0.386	3.06	0.377	1
ENSG00000260368	0.386	1.22	0.469	1
ENSG00000277969	0.386	2.87	0.381	1
ENSG00000132394	0.385	1.75	0.434	1
ENSG00000198618	0.385	8.6	0.349	1
ENSG00000122507	0.384	0.563	0.502	1
ENSG00000165115	0.384	1.97	0.412	1
ENSG00000173812	0.384	8.08	0.351	1
ENSG00000228649	0.384	2.13	0.402	1
ENSG00000235245	0.384	0.961	0.46	1
ENSG00000259590	0.384	2.66	0.389	1
ENSG00000162576	0.383	0.0123	0.578	1
ENSG00000183019	0.383	0.0123	0.578	1
ENSG00000196689	0.383	2.57	0.391	1
ENSG00000223427	0.383	0.0123	0.578	1
ENSG00000232803	0.383	0.0123	0.578	1
ENSG00000233297	0.383	0.0123	0.578	1
ENSG00000110881	0.382	0.643	0.481	1
ENSG00000133056	0.382	1.02	0.473	1
ENSG00000143994	0.382	1.02	0.473	1
ENSG00000144681	0.382	0.643	0.481	1
ENSG00000146414	0.382	4.83	0.362	1
ENSG00000168818	0.382	4.33	0.368	1
ENSG00000168970	0.381	1.08	0.459	1
ENSG00000198585	0.381	3.8	0.375	1
ENSG00000077327	0.38	1.41	0.423	1
ENSG00000120322	0.38	0.128	0.544	1
ENSG00000120457	0.38	1.91	0.43	1
ENSG00000160201	0.38	0.128	0.544	1
ENSG00000161643	0.38	0.128	0.544	1
ENSG00000165028	0.38	0.128	0.544	1
ENSG00000217653	0.38	0.128	0.544	1
ENSG00000138028	0.379	1.14	0.445	1
ENSG00000273319	0.379	2.31	0.402	1
ENSG00000280138	0.379	1.95	0.423	1
ENSG00000088538	0.378	3.4	0.385	1
ENSG00000103037	0.378	2.76	0.4	1
ENSG00000104756	0.378	4.97	0.367	1
ENSG00000135324	0.378	1.5	0.449	1
ENSG00000169375	0.378	5.27	0.364	1
ENSG00000173295	0.378	1.19	0.464	1
ENSG00000182489	0.378	1.98	0.416	1
ENSG00000117632	0.377	6.29	0.362	1
ENSG00000188013	0.377	0.234	0.514	1
ENSG00000261740	0.377	1.24	0.475	1
ENSG00000275160	0.377	0.234	0.514	1
ENSG00000112312	0.376	2.72	0.405	1
ENSG00000151062	0.376	3.89	0.38	1
ENSG00000231296	0.376	1.59	0.429	1
ENSG00000173486	0.375	4.93	0.37	1
ENSG00000186806	0.375	0.334	0.543	1
ENSG00000224216	0.375	0.334	0.543	1
ENSG00000235703	0.375	0.334	0.543	1
ENSG00000244716	0.375	0.334	0.543	1
ENSG00000255864	0.375	1.29	0.462	1
ENSG00000280069	0.375	0.334	0.543	1
ENSG00000151704	0.374	2.34	0.411	1
ENSG00000161888	0.374	2.34	0.411	1
ENSG00000176018	0.374	3.49	0.385	1
ENSG00000185379	0.374	1.66	0.452	1
ENSG00000197763	0.374	1.34	0.45	1
ENSG00000102098	0.373	1.39	0.439	1
ENSG00000136160	0.373	1.39	0.439	1
ENSG00000151690	0.373	4.6	0.375	1
ENSG00000185495	0.373	1.7	0.443	1
ENSG00000212232	0.373	6.75	0.367	1
ENSG00000230943	0.373	0.986	0.467	1
ENSG00000252835	0.373	5.07	0.373	1
ENSG00000272356	0.373	0.426	0.56	1
ENSG00000099940	0.372	3.95	0.383	1
ENSG00000163249	0.372	3.83	0.382	1
ENSG00000197372	0.372	2.26	0.425	1
ENSG00000101132	0.371	4.17	0.378	1
ENSG00000143643	0.371	4.92	0.376	1
ENSG00000164022	0.371	5.36	0.373	1
ENSG00000164171	0.371	3.28	0.392	1
ENSG00000170004	0.371	5.71	0.371	1
ENSG00000221817	0.371	0.514	0.534	1
ENSG00000223482	0.371	2.81	0.407	1
ENSG00000232888	0.371	2.05	0.438	1
ENSG00000276182	0.371	0.514	0.534	1
ENSG00000018408	0.37	1.56	0.444	1
ENSG00000138468	0.37	2.35	0.429	1
ENSG00000173200	0.37	1.1	0.465	1
ENSG00000186063	0.37	5.78	0.372	1
ENSG00000124549	0.369	1.6	0.453	1
ENSG00000180611	0.369	0.596	0.51	1
ENSG00000101955	0.368	1.21	0.469	1
ENSG00000104447	0.368	4.38	0.381	1
ENSG00000143178	0.368	2.24	0.422	1
ENSG00000151164	0.368	1.21	0.469	1
ENSG00000169740	0.368	2.66	0.409	1
ENSG00000170390	0.368	0.674	0.49	1
ENSG00000170919	0.368	0.674	0.49	1
ENSG00000135636	0.367	1.68	0.457	1
ENSG00000158169	0.367	1.31	0.468	1
ENSG00000142252	0.366	2.06	0.441	1
ENSG00000172215	0.366	0.748	0.505	1
ENSG00000196476	0.366	0.748	0.505	1
ENSG00000222011	0.366	1.36	0.456	1
ENSG00000090263	0.365	3.13	0.4	1
ENSG00000119772	0.365	3.73	0.395	1
ENSG00000129465	0.365	2.81	0.415	1
ENSG00000132141	0.365	0.818	0.527	1
ENSG00000249437	0.365	0.818	0.527	1
ENSG00000118523	0.364	0.885	0.507	1
ENSG00000120832	0.364	2.2	0.438	1
ENSG00000123154	0.364	2.23	0.431	1
ENSG00000142627	0.364	0.885	0.507	1
ENSG00000157693	0.364	2.43	0.415	1
ENSG00000170271	0.364	1.49	0.47	1
ENSG00000180957	0.364	4.98	0.382	1
ENSG00000196704	0.364	4.54	0.385	1
ENSG00000135749	0.363	3.64	0.399	1
ENSG00000144036	0.363	2.28	0.431	1
ENSG00000156500	0.363	-0.061	0.629	1
ENSG00000197302	0.363	4.04	0.391	1
ENSG00000233757	0.363	-0.061	0.629	1
ENSG00000088038	0.362	4.25	0.393	1
ENSG00000174028	0.362	1.01	0.503	1
ENSG00000227008	0.362	1.62	0.458	1
ENSG00000076554	0.361	1.66	0.471	1
ENSG00000138777	0.361	4.88	0.388	1
ENSG00000260804	0.361	1.66	0.471	1
ENSG00000138767	0.36	4.43	0.393	1
ENSG00000174238	0.36	5.48	0.387	1
ENSG00000225973	0.36	0.172	0.554	1
ENSG00000236939	0.36	2.13	0.431	1
ENSG00000264229	0.36	0.172	0.554	1
ENSG00000264630	0.36	0.172	0.554	1
ENSG00000272669	0.36	1.18	0.489	1
ENSG00000167257	0.359	2.29	0.434	1
ENSG00000189190	0.359	3.08	0.415	1
ENSG00000266338	0.359	3.56	0.407	1
ENSG00000043591	0.358	1.33	0.473	1
ENSG00000129675	0.358	4.11	0.399	1
ENSG00000141449	0.358	2.34	0.423	1
ENSG00000162757	0.358	2.36	0.443	1
ENSG00000235945	0.358	0.275	0.524	1
ENSG00000240857	0.358	1.93	0.454	1
ENSG00000283399	0.358	0.275	0.524	1
ENSG00000070018	0.357	3.27	0.414	1
ENSG00000099910	0.357	2.47	0.44	1
ENSG00000131876	0.357	4.03	0.401	1
ENSG00000132429	0.357	3.98	0.4	1
ENSG00000132967	0.357	3.46	0.411	1
ENSG00000162961	0.357	3.42	0.409	1
ENSG00000198108	0.357	2	0.438	1
ENSG00000226084	0.357	0.372	0.552	1
ENSG00000228536	0.357	1.42	0.499	1
ENSG00000145014	0.356	2.49	0.434	1
ENSG00000168081	0.356	0.462	0.569	1
ENSG00000263874	0.356	1.55	0.463	1
ENSG00000035115	0.355	3.21	0.416	1
ENSG00000047346	0.355	3.96	0.403	1
ENSG00000260735	0.355	1.67	0.475	1
ENSG00000263050	0.355	0.628	0.518	1
ENSG00000158079	0.354	3.51	0.414	1
ENSG00000179222	0.354	2.32	0.431	1
ENSG00000179630	0.354	3.93	0.407	1
ENSG00000128872	0.353	0.777	0.555	1
ENSG00000134480	0.353	4.91	0.4	1
ENSG00000153094	0.353	3.88	0.408	1
ENSG00000165475	0.353	2.41	0.434	1
ENSG00000279089	0.353	0.777	0.555	1
ENSG00000137809	0.352	0.974	0.496	1
ENSG00000147684	0.352	6.46	0.395	1
ENSG00000198406	0.352	3.66	0.408	1
ENSG00000275379	0.352	3.63	0.412	1
ENSG00000096654	0.351	2.18	0.444	1
ENSG00000174839	0.351	4.67	0.402	1
ENSG00000215030	0.351	1.15	0.51	1
ENSG00000280120	0.351	1.09	0.493	1
ENSG00000024422	0.35	2.35	0.455	1
ENSG00000096872	0.35	2.97	0.421	1
ENSG00000103942	0.35	2.94	0.428	1
ENSG00000114993	0.35	1.25	0.506	1
ENSG00000133313	0.35	4.97	0.4	1
ENSG00000135211	0.35	2.4	0.443	1
ENSG00000186230	0.35	1.25	0.506	1
ENSG00000270170	0.35	2.35	0.455	1
ENSG00000096060	0.349	4.46	0.406	1
ENSG00000111445	0.349	3.83	0.416	1
ENSG00000159210	0.349	4.92	0.403	1
ENSG00000185220	0.349	4.79	0.406	1
ENSG00000185710	0.349	1.53	0.479	1
ENSG00000185730	0.349	2.57	0.434	1
ENSG00000227615	0.349	1.49	0.491	1
ENSG00000237927	0.349	1.44	0.504	1
ENSG00000075945	0.348	4.37	0.409	1
ENSG00000109265	0.348	1.61	0.477	1
ENSG00000184584	0.348	3.24	0.426	1
ENSG00000222041	0.348	4.49	0.409	1
ENSG00000224831	0.348	3.37	0.427	1
ENSG00000090376	0.347	4.29	0.412	1
ENSG00000135972	0.347	3.71	0.418	1
ENSG00000151883	0.347	4.55	0.409	1
ENSG00000178913	0.347	6.52	0.401	1
ENSG00000182809	0.347	1.96	0.461	1
ENSG00000213889	0.347	1.93	0.469	1
ENSG00000042429	0.346	2.19	0.464	1
ENSG00000138785	0.346	3.47	0.424	1
ENSG00000163001	0.346	4.51	0.412	1
ENSG00000186104	0.346	2.27	0.456	1
ENSG00000120925	0.345	3.75	0.42	1
ENSG00000129646	0.345	3.78	0.419	1
ENSG00000151849	0.345	3.9	0.418	1
ENSG00000170502	0.345	2.62	0.449	1
ENSG00000040341	0.344	3.4	0.424	1
ENSG00000100077	0.344	3.25	0.429	1
ENSG00000184060	0.344	3.07	0.436	1
ENSG00000139597	0.343	3.92	0.421	1
ENSG00000175354	0.343	5.25	0.411	1
ENSG00000117228	0.342	3.27	0.434	1
ENSG00000138050	0.342	3.21	0.432	1
ENSG00000140941	0.342	5.7	0.411	1
ENSG00000157326	0.342	3.24	0.434	1
ENSG00000166136	0.342	3.24	0.434	1
ENSG00000167964	0.342	2.94	0.438	1
ENSG00000171262	0.342	2.61	0.447	1
ENSG00000174842	0.342	3.74	0.422	1
ENSG00000175711	0.342	1.78	0.482	1
ENSG00000214353	0.342	2	0.456	1
ENSG00000239883	0.342	2.71	0.453	1
ENSG00000079435	0.341	0.498	0.577	1
ENSG00000128266	0.341	0.315	0.591	1
ENSG00000157426	0.341	3.83	0.426	1
ENSG00000161328	0.341	0.937	0.521	1
ENSG00000161640	0.341	0.106	0.598	1
ENSG00000179750	0.341	0.498	0.577	1
ENSG00000180626	0.341	0.498	0.577	1
ENSG00000196507	0.341	0.409	0.607	1
ENSG00000227512	0.341	0.659	0.526	1
ENSG00000273142	0.341	0.106	0.598	1
ENSG00000281398	0.341	0.873	0.54	1
ENSG00000004866	0.34	3.21	0.431	1
ENSG00000132383	0.34	3.26	0.433	1
ENSG00000142065	0.34	-0.0109	0.639	1
ENSG00000228192	0.34	-0.0109	0.639	1
ENSG00000116521	0.339	6.05	0.413	1
ENSG00000139800	0.339	2.68	0.444	1
ENSG00000179922	0.339	2.62	0.449	1
ENSG00000089195	0.338	3.82	0.431	1
ENSG00000106993	0.338	5.85	0.415	1
ENSG00000110066	0.338	4.37	0.421	1
ENSG00000175582	0.338	6.22	0.414	1
ENSG00000185009	0.338	6.08	0.415	1
ENSG00000196730	0.338	4.26	0.422	1
ENSG00000008853	0.337	4.56	0.424	1
ENSG00000115761	0.337	4.62	0.425	1
ENSG00000155962	0.337	2.18	0.477	1
ENSG00000112759	0.336	3.97	0.432	1
ENSG00000137501	0.336	1.92	0.486	1
ENSG00000149292	0.336	1.75	0.478	1
ENSG00000171723	0.336	3.34	0.437	1
ENSG00000180353	0.336	6.59	0.417	1
ENSG00000188542	0.336	1.82	0.476	1
ENSG00000104218	0.335	3.56	0.44	1
ENSG00000120217	0.335	3.08	0.447	1
ENSG00000148606	0.335	5.12	0.422	1
ENSG00000279762	0.335	1.72	0.488	1
ENSG00000083535	0.334	4.18	0.429	1
ENSG00000127080	0.334	3.43	0.444	1
ENSG00000112941	0.333	3.94	0.433	1
ENSG00000118096	0.333	3.98	0.432	1
ENSG00000164066	0.333	2.17	0.471	1
ENSG00000166106	0.333	1.24	0.532	1
ENSG00000214087	0.333	3.17	0.449	1
ENSG00000214595	0.333	1.34	0.502	1
ENSG00000099834	0.332	1.14	0.538	1
ENSG00000155657	0.332	5.27	0.426	1
ENSG00000175334	0.332	3.3	0.446	1
ENSG00000236144	0.332	1.08	0.521	1
ENSG00000099399	0.331	1.02	0.539	1
ENSG00000123146	0.331	6.32	0.424	1
ENSG00000142657	0.331	8.47	0.421	1
ENSG00000198586	0.331	3.82	0.443	1
ENSG00000204611	0.331	2.51	0.464	1
ENSG00000055917	0.33	5.67	0.427	1
ENSG00000122033	0.33	3.14	0.446	1
ENSG00000143156	0.33	3.09	0.45	1
ENSG00000179918	0.33	3.76	0.444	1
ENSG00000179813	0.329	4.29	0.437	1
ENSG00000213178	0.329	1.73	0.492	1
ENSG00000279078	0.329	0.763	0.592	1
ENSG00000145982	0.328	2.6	0.467	1
ENSG00000154265	0.328	3.56	0.448	1
ENSG00000159212	0.328	2.18	0.491	1
ENSG00000182676	0.328	0.69	0.534	1
ENSG00000197181	0.328	0.69	0.534	1
ENSG00000253954	0.328	0.69	0.534	1
ENSG00000143179	0.327	4.86	0.432	1
ENSG00000144426	0.327	4.06	0.44	1
ENSG00000175854	0.327	3.06	0.464	1
ENSG00000182628	0.327	3.75	0.441	1
ENSG00000234268	0.327	0.613	0.558	1
ENSG00000100479	0.326	1.98	0.484	1
ENSG00000180316	0.326	1.98	0.484	1
ENSG00000197062	0.326	1.45	0.532	1
ENSG00000270194	0.326	1.41	0.522	1
ENSG00000047662	0.325	0.446	0.614	1
ENSG00000120647	0.325	3.1	0.454	1
ENSG00000143393	0.325	6.15	0.432	1
ENSG00000152404	0.325	3.44	0.454	1
ENSG00000168827	0.325	5.98	0.432	1
ENSG00000185482	0.325	2.27	0.485	1
ENSG00000131019	0.324	2.55	0.474	1
ENSG00000156650	0.324	3.47	0.449	1
ENSG00000245556	0.324	0.354	0.599	1
ENSG00000132965	0.323	2.14	0.479	1
ENSG00000139618	0.323	3.97	0.45	1
ENSG00000185164	0.323	5.86	0.436	1
ENSG00000198919	0.323	1.16	0.544	1
ENSG00000076650	0.322	3.22	0.466	1
ENSG00000079739	0.322	1.63	0.531	1
ENSG00000080986	0.322	4.07	0.451	1
ENSG00000085377	0.322	4.94	0.442	1
ENSG00000177675	0.322	3.84	0.449	1
ENSG00000181019	0.322	7.29	0.434	1
ENSG00000183784	0.322	2.05	0.504	1
ENSG00000200959	0.322	4.12	0.45	1
ENSG00000214293	0.322	1.1	0.527	1
ENSG00000225032	0.322	1.1	0.527	1
ENSG00000090273	0.321	4.59	0.447	1
ENSG00000113319	0.321	0.151	0.608	1
ENSG00000132170	0.321	3.62	0.455	1
ENSG00000134056	0.321	4.24	0.45	1
ENSG00000143126	0.321	1.55	0.509	1
ENSG00000147852	0.321	3.74	0.452	1
ENSG00000152582	0.321	0.151	0.608	1
ENSG00000187676	0.321	3.25	0.46	1
ENSG00000051825	0.32	5.23	0.442	1
ENSG00000091106	0.32	1.51	0.522	1
ENSG00000143398	0.32	5.51	0.442	1
ENSG00000176658	0.32	0.0376	0.648	1
ENSG00000180263	0.32	3.49	0.462	1
ENSG00000283341	0.32	0.0376	0.648	1
ENSG00000124104	0.319	1.83	0.497	1
ENSG00000140650	0.319	4.26	0.454	1
ENSG00000142583	0.319	4.41	0.451	1
ENSG00000151532	0.319	4.77	0.447	1
ENSG00000169271	0.319	1.86	0.509	1
ENSG00000176102	0.319	5.01	0.446	1
ENSG00000178971	0.319	2.83	0.471	1
ENSG00000187950	0.319	2.43	0.477	1
ENSG00000253873	0.319	3.26	0.462	1
ENSG00000198900	0.318	6.26	0.442	1
ENSG00000078399	0.317	3.88	0.456	1
ENSG00000111554	0.317	2.71	0.477	1
ENSG00000113494	0.317	1.76	0.5	1
ENSG00000164674	0.317	4.09	0.457	1
ENSG00000179409	0.317	3.87	0.461	1
ENSG00000221962	0.317	0.792	0.599	1
ENSG00000175764	0.316	0.72	0.541	1
ENSG00000178573	0.316	2.84	0.473	1
ENSG00000181722	0.316	1.97	0.5	1
ENSG00000198825	0.316	4.11	0.454	1
ENSG00000259592	0.316	0.72	0.541	1
ENSG00000196511	0.315	3.96	0.458	1
ENSG00000103540	0.314	3.61	0.468	1
ENSG00000111731	0.314	4.01	0.459	1
ENSG00000133069	0.314	0.645	0.565	1
ENSG00000133858	0.314	5.71	0.449	1
ENSG00000164182	0.314	2.35	0.495	1
ENSG00000171989	0.314	0.645	0.565	1
ENSG00000183508	0.314	4.35	0.456	1
ENSG00000250444	0.314	1.18	0.549	1
ENSG00000100802	0.313	1.13	0.568	1
ENSG00000133106	0.313	3.92	0.463	1
ENSG00000135108	0.313	4.45	0.458	1
ENSG00000144468	0.313	3.74	0.463	1
ENSG00000160229	0.313	0.565	0.592	1
ENSG00000172965	0.313	4.27	0.461	1
ENSG00000175575	0.313	2.32	0.502	1
ENSG00000209042	0.313	1.13	0.568	1
ENSG00000250519	0.313	0.565	0.592	1
ENSG00000090975	0.312	2.62	0.484	1
ENSG00000102271	0.312	1.07	0.551	1
ENSG00000118640	0.312	3.97	0.464	1
ENSG00000136231	0.312	1.49	0.541	1
ENSG00000148841	0.312	5.77	0.452	1
ENSG00000149554	0.311	4.14	0.46	1
ENSG00000277147	0.311	0.481	0.622	1
ENSG00000024862	0.31	3.67	0.47	1
ENSG00000037897	0.31	3.07	0.484	1
ENSG00000095261	0.31	4.52	0.464	1
ENSG00000112208	0.31	3.44	0.474	1
ENSG00000122863	0.31	3.32	0.473	1
ENSG00000149809	0.31	1.96	0.513	1
ENSG00000154743	0.31	2.17	0.52	1
ENSG00000160055	0.31	2.17	0.52	1
ENSG00000091136	0.309	3.09	0.482	1
ENSG00000136935	0.309	4.29	0.467	1
ENSG00000140451	0.309	0.392	0.607	1
ENSG00000148483	0.309	0.392	0.607	1
ENSG00000152804	0.309	2.5	0.497	1
ENSG00000153832	0.309	0.392	0.607	1
ENSG00000167925	0.309	3.31	0.477	1
ENSG00000173542	0.309	5.28	0.458	1
ENSG00000177602	0.309	2.61	0.492	1
ENSG00000178631	0.309	0.392	0.607	1
ENSG00000223503	0.309	0.951	0.559	1
ENSG00000254122	0.309	0.392	0.607	1
ENSG00000272145	0.309	3.46	0.472	1
ENSG00000057657	0.308	4.35	0.464	1
ENSG00000136628	0.308	8.51	0.454	1
ENSG00000138668	0.308	4.67	0.464	1
ENSG00000176046	0.308	1.63	0.552	1
ENSG00000185480	0.308	2.26	0.498	1
ENSG00000012211	0.307	1.82	0.515	1
ENSG00000087085	0.307	0.887	0.581	1
ENSG00000128564	0.307	1.82	0.515	1
ENSG00000188211	0.307	2.03	0.516	1
ENSG00000197713	0.307	4.83	0.465	1
ENSG00000116641	0.306	4.33	0.469	1
ENSG00000121316	0.306	4.67	0.467	1
ENSG00000138439	0.306	1.55	0.531	1
ENSG00000156515	0.306	5.85	0.46	1
ENSG00000156697	0.306	5.83	0.461	1
ENSG00000162723	0.306	0.82	0.605	1
ENSG00000170439	0.306	4.63	0.464	1
ENSG00000171204	0.306	4.33	0.471	1
ENSG00000183049	0.306	2.78	0.496	1
ENSG00000234826	0.306	0.296	0.641	1
ENSG00000255916	0.306	0.82	0.605	1
ENSG00000272645	0.306	0.296	0.641	1
ENSG00000075131	0.305	3.23	0.482	1
ENSG00000117155	0.305	3.14	0.489	1
ENSG00000135976	0.305	2.85	0.486	1
ENSG00000139624	0.305	4.02	0.473	1
ENSG00000157796	0.305	4.08	0.472	1
ENSG00000163541	0.305	5.42	0.464	1
ENSG00000263002	0.305	3.84	0.479	1
ENSG00000085224	0.304	5.35	0.466	1
ENSG00000102524	0.304	1.72	0.531	1
ENSG00000120280	0.304	1.15	0.573	1
ENSG00000131944	0.304	1.94	0.526	1
ENSG00000137055	0.304	5.27	0.466	1
ENSG00000167380	0.304	3.01	0.493	1
ENSG00000172361	0.304	1.15	0.573	1
ENSG00000182606	0.304	4.93	0.468	1
ENSG00000254093	0.304	3.63	0.476	1
ENSG00000076248	0.303	3.87	0.476	1
ENSG00000119673	0.303	3.22	0.488	1
ENSG00000134698	0.303	4.59	0.472	1
ENSG00000136874	0.303	3.24	0.487	1
ENSG00000138495	0.303	4.85	0.468	1
ENSG00000156463	0.303	0.194	0.617	1
ENSG00000156504	0.303	3.38	0.482	1
ENSG00000161912	0.303	3.87	0.476	1
ENSG00000175548	0.303	2.37	0.515	1
ENSG00000176714	0.303	0.194	0.617	1
ENSG00000179271	0.303	4.37	0.473	1
ENSG00000267493	0.303	1.9	0.519	1
ENSG00000104067	0.302	2.61	0.503	1
ENSG00000117115	0.302	0.676	0.572	1
ENSG00000118322	0.302	3.19	0.487	1
ENSG00000129474	0.302	1.37	0.537	1
ENSG00000149557	0.302	3.28	0.489	1
ENSG00000175489	0.302	0.676	0.572	1
ENSG00000101265	0.301	3.67	0.482	1
ENSG00000151575	0.301	3.22	0.489	1
ENSG00000163814	0.301	3.45	0.484	1
ENSG00000198000	0.301	5.07	0.472	1
ENSG00000221914	0.301	5.59	0.469	1
ENSG00000259932	0.301	2.33	0.518	1
ENSG00000027001	0.3	3.33	0.484	1
ENSG00000101452	0.3	4.26	0.479	1
ENSG00000125520	0.3	3.53	0.493	1
ENSG00000130349	0.3	3.82	0.482	1
ENSG00000167842	0.3	2.55	0.498	1
ENSG00000182704	0.3	0.0845	0.657	1
ENSG00000188493	0.3	0.0845	0.657	1
ENSG00000197162	0.3	0.0845	0.657	1
ENSG00000255150	0.3	2.14	0.511	1
ENSG00000268403	0.3	1.32	0.553	1
ENSG00000038382	0.299	3.77	0.487	1
ENSG00000109472	0.299	3.73	0.486	1
ENSG00000124383	0.299	4.56	0.475	1
ENSG00000184708	0.299	3.88	0.483	1
ENSG00000204390	0.299	1.27	0.57	1
ENSG00000005471	0.298	3.7	0.49	1
ENSG00000102543	0.298	2.08	0.529	1
ENSG00000102967	0.298	2.48	0.518	1
ENSG00000162385	0.298	4.06	0.48	1
ENSG00000163510	0.298	4.95	0.476	1
ENSG00000164296	0.298	2.8	0.511	1
ENSG00000168887	0.298	3.12	0.49	1
ENSG00000197296	0.298	1.92	0.523	1
ENSG00000129473	0.297	4.38	0.48	1
ENSG00000143199	0.297	0.516	0.629	1
ENSG00000180423	0.297	1.48	0.564	1
ENSG00000239569	0.297	0.516	0.629	1
ENSG00000105953	0.296	6.9	0.472	1
ENSG00000154889	0.296	2.53	0.507	1
ENSG00000213551	0.296	4.2	0.485	1
ENSG00000224993	0.296	2.62	0.508	1
ENSG00000179761	0.295	0.847	0.611	1
ENSG00000223705	0.295	3.48	0.499	1
ENSG00000238164	0.295	1.62	0.552	1
ENSG00000279792	0.295	0.847	0.611	1
ENSG00000019995	0.294	4.72	0.484	1
ENSG00000022556	0.294	3.16	0.501	1
ENSG00000100448	0.294	3.96	0.489	1
ENSG00000115053	0.294	7.51	0.475	1
ENSG00000117151	0.294	3.39	0.499	1
ENSG00000132670	0.294	4.13	0.489	1
ENSG00000156639	0.294	5.09	0.483	1
ENSG00000164070	0.294	3.3	0.502	1
ENSG00000169398	0.294	4.81	0.484	1
ENSG00000185515	0.294	2.24	0.523	1
ENSG00000187391	0.294	0.429	0.663	1
ENSG00000106018	0.293	1.58	0.54	1
ENSG00000144485	0.293	3.13	0.51	1
ENSG00000204177	0.293	2.21	0.532	1
ENSG00000271605	0.293	3.52	0.499	1
ENSG00000107798	0.292	8.64	0.477	1
ENSG00000156711	0.292	5	0.484	1
ENSG00000165630	0.292	2.88	0.515	1
ENSG00000185414	0.292	3.34	0.508	1
ENSG00000278000	0.292	1.06	0.582	1
ENSG00000281649	0.292	5.07	0.483	1
ENSG00000080822	0.291	4.71	0.487	1
ENSG00000100344	0.291	1.71	0.551	1
ENSG00000103150	0.291	3.25	0.504	1
ENSG00000113597	0.291	4.69	0.488	1
ENSG00000116044	0.291	6.86	0.48	1
ENSG00000187240	0.291	3.19	0.512	1
ENSG00000221823	0.291	3.94	0.496	1
ENSG00000022976	0.29	2.25	0.526	1
ENSG00000121853	0.29	0.336	0.649	1
ENSG00000121933	0.29	0.706	0.579	1
ENSG00000127329	0.29	3.93	0.499	1
ENSG00000127947	0.29	7.24	0.481	1
ENSG00000146587	0.29	4.3	0.493	1
ENSG00000171150	0.29	3.63	0.498	1
ENSG00000181315	0.29	3.97	0.492	1
ENSG00000196421	0.29	0.336	0.649	1
ENSG00000204599	0.29	2.25	0.526	1
ENSG00000076685	0.289	4.84	0.49	1
ENSG00000101084	0.289	2.22	0.534	1
ENSG00000105662	0.289	2.7	0.519	1
ENSG00000113360	0.289	4.06	0.499	1
ENSG00000137831	0.289	2.62	0.518	1
ENSG00000164961	0.289	6.13	0.484	1
ENSG00000255833	0.289	1	0.571	1
ENSG00000116793	0.288	5.01	0.491	1
ENSG00000134333	0.288	8.15	0.483	1
ENSG00000140943	0.288	5.78	0.487	1
ENSG00000083093	0.287	4.45	0.498	1
ENSG00000118197	0.287	4.97	0.494	1
ENSG00000135144	0.287	0.63	0.606	1
ENSG00000157823	0.287	2.82	0.519	1
ENSG00000163395	0.287	4.41	0.497	1
ENSG00000176422	0.287	2.65	0.525	1
ENSG00000179362	0.287	0.236	0.625	1
ENSG00000188133	0.287	0.236	0.625	1
ENSG00000197747	0.287	5.94	0.488	1
ENSG00000221539	0.287	1.6	0.544	1
ENSG00000260062	0.287	2.39	0.533	1
ENSG00000119638	0.286	4.75	0.495	1
ENSG00000121210	0.286	3.61	0.504	1
ENSG00000134684	0.286	6.38	0.489	1
ENSG00000148773	0.286	5.29	0.492	1
ENSG00000198130	0.285	2.32	0.544	1
ENSG00000067141	0.284	3.34	0.514	1
ENSG00000133315	0.284	2.21	0.546	1
ENSG00000138378	0.284	3.01	0.521	1
ENSG00000138709	0.284	5.21	0.495	1
ENSG00000140463	0.284	4.11	0.505	1
ENSG00000145414	0.284	3.14	0.521	1
ENSG00000153904	0.284	3.2	0.521	1
ENSG00000166197	0.284	6.24	0.492	1
ENSG00000177535	0.284	1.51	0.573	1
ENSG00000182795	0.284	2.5	0.535	1
ENSG00000244879	0.284	2.94	0.521	1
ENSG00000084112	0.283	4.4	0.503	1
ENSG00000088053	0.283	1.08	0.587	1
ENSG00000116771	0.283	1.65	0.581	1
ENSG00000132467	0.283	4.13	0.508	1
ENSG00000139679	0.283	2.86	0.517	1
ENSG00000143258	0.283	3.78	0.507	1
ENSG00000163625	0.283	6.39	0.494	1
ENSG00000180346	0.283	2.72	0.523	1
ENSG00000196549	0.283	1.08	0.587	1
ENSG00000250979	0.283	1.65	0.581	1
ENSG00000273237	0.283	1.08	0.587	1
ENSG00000008226	0.282	0.13	0.665	1
ENSG00000008517	0.282	2.15	0.532	1
ENSG00000128581	0.282	2.45	0.538	1
ENSG00000135540	0.282	2.68	0.536	1
ENSG00000160408	0.282	4.99	0.501	1
ENSG00000172113	0.282	2.96	0.528	1
ENSG00000175832	0.282	1.47	0.588	1
ENSG00000176890	0.282	1.47	0.588	1
ENSG00000228492	0.282	0.13	0.665	1
ENSG00000240344	0.282	3.02	0.523	1
ENSG00000251682	0.282	2.03	0.552	1
ENSG00000253738	0.282	3.61	0.51	1
ENSG00000266469	0.282	3.08	0.523	1
ENSG00000270728	0.282	0.13	0.665	1
ENSG00000109618	0.281	4.34	0.506	1
ENSG00000166483	0.281	3.97	0.511	1
ENSG00000168564	0.281	5.01	0.501	1
ENSG00000171155	0.281	2.88	0.534	1
ENSG00000213741	0.281	7.69	0.495	1
ENSG00000144566	0.28	5.63	0.5	1
ENSG00000164190	0.28	6.11	0.499	1
ENSG00000180257	0.28	1.43	0.58	1
ENSG00000189164	0.28	0.464	0.669	1
ENSG00000233750	0.28	0.464	0.669	1
ENSG00000261490	0.28	1.02	0.609	1
ENSG00000108587	0.279	5.71	0.502	1
ENSG00000110492	0.279	1.21	0.588	1
ENSG00000142856	0.279	2.69	0.538	1
ENSG00000146143	0.279	4.37	0.506	1
ENSG00000147996	0.279	3.44	0.521	1
ENSG00000150782	0.279	3.01	0.53	1
ENSG00000163947	0.279	3.58	0.521	1
ENSG00000167232	0.279	3.54	0.521	1
ENSG00000273295	0.279	1.97	0.553	1
ENSG00000107738	0.278	2.67	0.544	1
ENSG00000115827	0.278	3.51	0.522	1
ENSG00000123358	0.278	0.736	0.631	1
ENSG00000131018	0.278	4.52	0.51	1
ENSG00000136146	0.278	3.83	0.518	1
ENSG00000164850	0.278	2.17	0.553	1
ENSG00000223959	0.278	3.15	0.526	1
ENSG00000257704	0.278	0.736	0.631	1
ENSG00000267607	0.278	2.81	0.536	1
ENSG00000071054	0.277	7.42	0.501	1
ENSG00000112578	0.277	4.49	0.508	1
ENSG00000133216	0.277	0.0148	0.711	1
ENSG00000136770	0.277	5.48	0.505	1
ENSG00000139220	0.277	4.14	0.517	1
ENSG00000140025	0.277	1.16	0.608	1
ENSG00000163322	0.277	1.16	0.608	1
ENSG00000165409	0.277	0.0148	0.711	1
ENSG00000166845	0.277	1.67	0.585	1
ENSG00000215126	0.277	1.16	0.608	1
ENSG00000228981	0.277	1.67	0.585	1
ENSG00000234040	0.277	0.0148	0.711	1
ENSG00000234409	0.277	0.0148	0.711	1
ENSG00000119865	0.276	2.76	0.545	1
ENSG00000129003	0.276	7.05	0.503	1
ENSG00000129467	0.276	1.49	0.593	1
ENSG00000213977	0.276	2.31	0.558	1
ENSG00000124831	0.275	6.07	0.507	1
ENSG00000133619	0.275	1.87	0.57	1
ENSG00000163328	0.275	0.661	0.612	1
ENSG00000163659	0.275	7.12	0.505	1
ENSG00000166477	0.275	5.02	0.511	1
ENSG00000171469	0.275	3.28	0.528	1
ENSG00000204315	0.275	2.37	0.544	1
ENSG00000213722	0.275	3.76	0.519	1
ENSG00000117525	0.274	3.06	0.534	1
ENSG00000134853	0.274	0.901	0.622	1
ENSG00000138380	0.274	1.11	0.629	1
ENSG00000153922	0.274	6.15	0.508	1
ENSG00000211456	0.274	5.6	0.509	1
ENSG00000280347	0.274	3.12	0.534	1
ENSG00000074266	0.273	4.44	0.518	1
ENSG00000120370	0.273	4.1	0.521	1
ENSG00000166278	0.273	3.14	0.538	1
ENSG00000196850	0.273	4.85	0.514	1
ENSG00000198342	0.273	1.72	0.575	1
ENSG00000204435	0.273	4.67	0.518	1
ENSG00000075213	0.272	3.29	0.531	1
ENSG00000135052	0.272	5.4	0.514	1
ENSG00000235106	0.272	2.92	0.535	1
ENSG00000063761	0.271	1.24	0.593	1
ENSG00000109680	0.271	1.4	0.601	1
ENSG00000148814	0.271	1.4	0.601	1
ENSG00000152457	0.271	3.54	0.534	1
ENSG00000154760	0.271	1.81	0.572	1
ENSG00000175970	0.271	4.44	0.521	1
ENSG00000186666	0.271	1.24	0.593	1
ENSG00000187720	0.271	0.277	0.694	1
ENSG00000205208	0.271	1.92	0.561	1
ENSG00000274370	0.271	1.05	0.614	1
ENSG00000279672	0.271	1.4	0.601	1
ENSG00000040633	0.27	3.31	0.535	1
ENSG00000073861	0.27	3.73	0.526	1
ENSG00000121851	0.27	2.27	0.548	1
ENSG00000129691	0.27	5.11	0.518	1
ENSG00000148300	0.27	4.27	0.524	1
ENSG00000165731	0.27	3.18	0.532	1
ENSG00000180488	0.27	3.97	0.527	1
ENSG00000185340	0.27	3.49	0.529	1
ENSG00000214046	0.27	4.1	0.525	1
ENSG00000053900	0.269	4.69	0.525	1
ENSG00000106086	0.269	3.19	0.545	1
ENSG00000116128	0.269	1.35	0.588	1
ENSG00000162927	0.269	3.53	0.533	1
ENSG00000164308	0.269	2.33	0.563	1
ENSG00000187164	0.269	3	0.538	1
ENSG00000121486	0.268	5.18	0.52	1
ENSG00000122566	0.268	7.42	0.515	1
ENSG00000133794	0.268	5.11	0.522	1
ENSG00000146574	0.268	3.82	0.53	1
ENSG00000155744	0.268	5.1	0.521	1
ENSG00000163029	0.268	4.49	0.523	1
ENSG00000169490	0.268	5.42	0.52	1
ENSG00000170775	0.268	1.85	0.586	1
ENSG00000188766	0.268	1.85	0.586	1
ENSG00000108599	0.267	4.81	0.524	1
ENSG00000135722	0.267	0.765	0.677	1
ENSG00000140470	0.267	0.765	0.677	1
ENSG00000156535	0.267	8.46	0.516	1
ENSG00000163964	0.267	3.27	0.543	1
ENSG00000170456	0.267	2.52	0.554	1
ENSG00000237310	0.267	0.765	0.677	1
ENSG00000258297	0.267	0.765	0.677	1
ENSG00000264112	0.267	4.36	0.528	1
ENSG00000080298	0.266	3.8	0.534	1
ENSG00000115295	0.266	3.45	0.545	1
ENSG00000117601	0.266	0.499	0.676	1
ENSG00000197961	0.266	4.35	0.529	1
ENSG00000102103	0.265	4.07	0.531	1
ENSG00000137806	0.265	3.99	0.536	1
ENSG00000161542	0.265	4.26	0.531	1
ENSG00000165732	0.265	8.11	0.52	1
ENSG00000187741	0.265	4.37	0.532	1
ENSG00000240429	0.265	0.927	0.628	1
ENSG00000268218	0.265	0.174	0.673	1
ENSG00000103196	0.264	1.78	0.569	1
ENSG00000119953	0.264	4.15	0.534	1
ENSG00000135457	0.264	4.22	0.532	1
ENSG00000143947	0.264	9.19	0.52	1
ENSG00000156876	0.264	3.18	0.55	1
ENSG00000160219	0.264	2.87	0.553	1
ENSG00000163006	0.264	1.66	0.607	1
ENSG00000037749	0.263	5.21	0.528	1
ENSG00000049167	0.263	3.43	0.541	1
ENSG00000140386	0.263	3.35	0.548	1
ENSG00000145216	0.263	2.89	0.558	1
ENSG00000151914	0.263	7.02	0.524	1
ENSG00000153317	0.263	8.39	0.522	1
ENSG00000163141	0.263	1.52	0.601	1
ENSG00000169136	0.263	5.11	0.53	1
ENSG00000169826	0.263	4.59	0.533	1
ENSG00000187514	0.263	8.27	0.523	1
ENSG00000189376	0.263	2.98	0.552	1
ENSG00000204054	0.263	2.85	0.559	1
ENSG00000234456	0.263	1.52	0.601	1
ENSG00000235253	0.263	0.692	0.619	1
ENSG00000001167	0.262	5.56	0.528	1
ENSG00000009724	0.262	1.37	0.624	1
ENSG00000069764	0.262	1.37	0.624	1
ENSG00000076716	0.262	7.39	0.525	1
ENSG00000079482	0.262	1.62	0.6	1
ENSG00000095321	0.262	3.63	0.547	1
ENSG00000123600	0.262	4.16	0.538	1
ENSG00000137337	0.262	3.18	0.552	1
ENSG00000161970	0.262	5.89	0.527	1
ENSG00000170473	0.262	4.85	0.531	1
ENSG00000187555	0.262	6.84	0.525	1
ENSG00000188243	0.262	4.17	0.535	1
ENSG00000198146	0.262	4.43	0.538	1
ENSG00000198945	0.262	1.07	0.619	1
ENSG00000214013	0.262	3.44	0.542	1
ENSG00000237522	0.262	2.12	0.573	1
ENSG00000100558	0.261	1.2	0.617	1
ENSG00000101213	0.261	0.411	0.713	1
ENSG00000139719	0.261	3.12	0.553	1
ENSG00000144746	0.261	5.58	0.531	1
ENSG00000144815	0.261	1.83	0.602	1
ENSG00000145439	0.261	3.04	0.558	1
ENSG00000162188	0.261	0.411	0.713	1
ENSG00000185787	0.261	6.36	0.528	1
ENSG00000188002	0.261	2.02	0.586	1
ENSG00000237437	0.261	0.411	0.713	1
ENSG00000088356	0.26	3.81	0.542	1
ENSG00000099290	0.26	4.49	0.54	1
ENSG00000123297	0.26	3.78	0.546	1
ENSG00000147669	0.26	4.88	0.538	1
ENSG00000198695	0.26	5.72	0.532	1
ENSG00000277149	0.26	2.09	0.583	1
ENSG00000104321	0.259	3.55	0.55	1
ENSG00000105708	0.259	2.22	0.581	1
ENSG00000107537	0.259	2.56	0.567	1
ENSG00000120149	0.259	1.01	0.609	1
ENSG00000136925	0.259	3.45	0.552	1
ENSG00000170909	0.259	1.01	0.609	1
ENSG00000173567	0.259	0.615	0.649	1
ENSG00000181704	0.259	5.88	0.532	1
ENSG00000185641	0.259	2.22	0.581	1
ENSG00000188321	0.259	3.14	0.557	1
ENSG00000229944	0.259	4.1	0.543	1
ENSG00000000419	0.258	5.69	0.535	1
ENSG00000083168	0.258	6.86	0.532	1
ENSG00000100028	0.258	5.66	0.535	1
ENSG00000100815	0.258	6.45	0.533	1
ENSG00000102309	0.258	2.81	0.558	1
ENSG00000127589	0.258	0.0624	0.719	1
ENSG00000147383	0.258	3.84	0.547	1
ENSG00000151458	0.258	5.27	0.536	1
ENSG00000171045	0.258	1.68	0.611	1
ENSG00000174145	0.258	0.0624	0.719	1
ENSG00000178460	0.258	0.0624	0.719	1
ENSG00000092094	0.257	4.63	0.542	1
ENSG00000137727	0.257	1.76	0.585	1
ENSG00000155903	0.257	4.59	0.54	1
ENSG00000155974	0.257	2.03	0.589	1
ENSG00000156140	0.257	0.793	0.682	1
ENSG00000172613	0.257	2.34	0.58	1
ENSG00000178988	0.257	5.64	0.536	1
ENSG00000184226	0.257	2.79	0.565	1
ENSG00000273038	0.257	0.793	0.682	1
ENSG00000107614	0.256	1.85	0.605	1
ENSG00000113231	0.256	0.317	0.701	1
ENSG00000114784	0.256	4.55	0.546	1
ENSG00000115942	0.256	2.87	0.564	1
ENSG00000121897	0.256	2.45	0.578	1
ENSG00000128654	0.256	3.43	0.554	1
ENSG00000144134	0.256	2.67	0.579	1
ENSG00000144161	0.256	2.57	0.569	1
ENSG00000177575	0.256	2.45	0.578	1
ENSG00000180979	0.256	4.3	0.547	1
ENSG00000272405	0.256	0.317	0.701	1
ENSG00000108433	0.255	5.27	0.541	1
ENSG00000120705	0.255	8.44	0.535	1
ENSG00000140280	0.255	0.952	0.633	1
ENSG00000144481	0.255	3.25	0.561	1
ENSG00000159216	0.255	6.11	0.537	1
ENSG00000184208	0.255	2.6	0.575	1
ENSG00000197111	0.255	5.83	0.539	1
ENSG00000046651	0.254	4.52	0.547	1
ENSG00000101247	0.254	2.35	0.582	1
ENSG00000124839	0.254	2.07	0.597	1
ENSG00000131127	0.254	2.35	0.582	1
ENSG00000143401	0.254	4.85	0.546	1
ENSG00000153774	0.254	3.24	0.557	1
ENSG00000163032	0.254	0.534	0.682	1
ENSG00000171246	0.254	3.49	0.555	1
ENSG00000182218	0.254	2.58	0.583	1
ENSG00000225434	0.254	0.534	0.682	1
ENSG00000273899	0.254	2.07	0.597	1
ENSG00000022267	0.253	2.2	0.594	1
ENSG00000121957	0.253	3.76	0.553	1
ENSG00000131979	0.253	3.11	0.568	1
ENSG00000196214	0.253	3.53	0.559	1
ENSG00000224950	0.253	1.23	0.622	1
ENSG00000008256	0.252	4.39	0.553	1
ENSG00000077616	0.252	0.722	0.625	1
ENSG00000108839	0.252	1.34	0.615	1
ENSG00000117419	0.252	4.99	0.547	1
ENSG00000127804	0.252	4.66	0.548	1
ENSG00000135070	0.252	5.28	0.546	1
ENSG00000141873	0.252	3.37	0.56	1
ENSG00000157456	0.252	4.02	0.553	1
ENSG00000165813	0.252	3.34	0.561	1
ENSG00000169599	0.252	3.99	0.551	1
ENSG00000205629	0.252	3.43	0.56	1
ENSG00000008988	0.251	9.77	0.541	1
ENSG00000078618	0.251	6.68	0.542	1
ENSG00000122958	0.251	5.17	0.548	1
ENSG00000137815	0.251	5.13	0.548	1
ENSG00000145734	0.251	6.12	0.544	1
ENSG00000153933	0.251	3.18	0.569	1
ENSG00000164976	0.251	0.888	0.659	1
ENSG00000175324	0.251	4.72	0.551	1
ENSG00000197299	0.251	4.52	0.552	1
ENSG00000104450	0.25	3.56	0.568	1
ENSG00000117054	0.25	4.77	0.551	1
ENSG00000138162	0.25	4.25	0.553	1
ENSG00000164366	0.25	3.66	0.557	1
ENSG00000178567	0.25	3.79	0.561	1
ENSG00000185291	0.25	3.78	0.559	1
ENSG00000264343	0.25	3.66	0.557	1
ENSG00000277258	0.25	1.65	0.63	1
ENSG00000101082	0.249	0.217	0.68	1
ENSG00000116127	0.249	3.55	0.565	1
ENSG00000137404	0.249	1.3	0.635	1
ENSG00000145819	0.249	5.54	0.549	1
ENSG00000154122	0.249	4.14	0.555	1
ENSG00000157181	0.249	5.41	0.55	1
[truncated: 11,585 more rows]

## Sheet: DMSO vs T5 20hrs
Gene	logFC	logCPM	PValue	FDR
ENSG00000243609	2.82	-0.596	0.000342	1
ENSG00000105193	2.69	5.84	1.14e-09	1.56e-05
ENSG00000160318	2.68	-0.418	0.000372	1
ENSG00000169271	2.68	-0.418	0.000372	1
ENSG00000253649	2.22	-0.0115	0.000649	1
ENSG00000169242	2.17	-0.384	0.00241	1
ENSG00000239503	2.14	-0.229	0.00173	1
ENSG00000264885	2.14	-0.229	0.00173	1
ENSG00000250130	2.12	-0.417	0.00313	1
ENSG00000224616	2.08	-0.45	0.00313	1
ENSG00000279069	2.07	0.0139	0.00121	1
ENSG00000261971	2.03	-0.485	0.00407	1
ENSG00000260804	2	0.2	0.00108	1
ENSG00000241112	1.97	-0.199	0.00322	1
ENSG00000120215	1.96	0.724	0.000382	1
ENSG00000263155	1.93	-0.383	0.00591	1
ENSG00000129295	1.89	0.422	0.00111	1
ENSG00000198816	1.89	-0.258	0.00513	1
ENSG00000237781	1.89	0.422	0.00111	1
ENSG00000268403	1.88	0.11	0.00238	1
ENSG00000225505	1.85	-0.288	0.00649	1
ENSG00000249087	1.84	-0.45	0.00758	1
ENSG00000113356	1.81	0.0635	0.00355	1
ENSG00000268471	1.81	0.365	0.00186	1
ENSG00000174403	1.79	0.156	0.0032	1
ENSG00000142621	1.77	0.582	0.00151	1
ENSG00000263466	1.69	-0.142	0.00927	1
ENSG00000237517	1.66	-0.287	0.0137	1
ENSG00000185271	1.65	-0.17	0.0115	1
ENSG00000066185	1.64	0.404	0.00427	1
ENSG00000119636	1.64	-0.0611	0.00973	1
ENSG00000186787	1.62	0.223	0.00637	1
ENSG00000139174	1.61	-0.318	0.0171	1
ENSG00000158825	1.61	-0.318	0.0171	1
ENSG00000088340	1.6	-0.0874	0.0119	1
ENSG00000130720	1.56	0.18	0.00908	1
ENSG00000236779	1.56	0.266	0.00793	1
ENSG00000257815	1.53	0.405	0.00727	1
ENSG00000265688	1.53	0.0646	0.0127	1
ENSG00000170153	1.48	0.583	0.00696	1
ENSG00000174327	1.48	0.648	0.00625	1
ENSG00000141854	1.47	0.202	0.0132	1
ENSG00000124191	1.45	1.26	0.00482	1
ENSG00000100823	1.44	4.74	0.000754	1
ENSG00000233783	1.44	-0.198	0.0268	1
ENSG00000091536	1.43	-0.318	0.0332	1
ENSG00000160207	1.43	-0.318	0.0332	1
ENSG00000276728	1.43	0.0887	0.0185	1
ENSG00000279640	1.43	-0.318	0.0332	1
ENSG00000102384	1.42	0.405	0.0119	1
ENSG00000225361	1.41	0.532	0.0107	1
ENSG00000102038	1.4	0.461	0.0121	1
ENSG00000276141	1.38	0.857	0.0106	1
ENSG00000168152	1.37	0.135	0.0221	1
ENSG00000274270	1.37	0.633	0.0111	1
ENSG00000169627	1.36	0.681	0.0113	1
ENSG00000243970	1.36	0.041	0.0264	1
ENSG00000272316	1.36	0.843	0.0119	1
ENSG00000100068	1.35	0.938	0.0109	1
ENSG00000010379	1.33	-0.169	0.0392	1
ENSG00000072201	1.33	0.113	0.0262	1
ENSG00000147166	1.32	0.406	0.019	1
ENSG00000076706	1.31	-0.286	0.049	1
ENSG00000234705	1.31	-0.286	0.049	1
ENSG00000262903	1.3	0.697	0.019	1
ENSG00000278993	1.3	-0.0863	0.0384	1
ENSG00000198576	1.29	3.25	0.0033	1
ENSG00000125740	1.26	0.224	0.0303	1
ENSG00000137857	1.26	0.872	0.019	1
ENSG00000236269	1.26	-0.113	0.0462	1
ENSG00000279529	1.26	-0.113	0.0462	1
ENSG00000188493	1.25	0.912	0.019	1
ENSG00000279520	1.25	1	0.0171	1
ENSG00000164266	1.24	-0.226	0.0576	1
ENSG00000168899	1.24	-0.0337	0.0449	1
ENSG00000254783	1.24	-0.226	0.0576	1
ENSG00000256092	1.24	0.348	0.0295	1
ENSG00000225422	1.23	0.801	0.0239	1
ENSG00000243660	1.23	0.203	0.0355	1
ENSG00000165685	1.22	-0.14	0.0554	1
ENSG00000233937	1.22	0.267	0.0348	1
ENSG00000274370	1.21	0.328	0.0342	1
ENSG00000103044	1.2	0.516	0.0285	1
ENSG00000133246	1.2	0.181	0.0415	1
ENSG00000233885	1.2	-0.0595	0.0535	1
ENSG00000250995	1.2	0.181	0.0415	1
ENSG00000026036	1.19	1.09	0.0208	1
ENSG00000105289	1.19	0.444	0.0331	1
ENSG00000168427	1.19	0.444	0.0331	1
ENSG00000172878	1.19	0.246	0.0406	1
ENSG00000228492	1.19	1.09	0.0208	1
ENSG00000279278	1.19	-0.255	0.0696	1
ENSG00000281005	1.19	-0.255	0.0696	1
ENSG00000142513	1.18	-0.168	0.0665	1
ENSG00000167105	1.18	-0.168	0.0665	1
ENSG00000224401	1.18	-0.168	0.0665	1
ENSG00000231312	1.18	-0.168	0.0665	1
ENSG00000236397	1.18	-0.168	0.0665	1
ENSG00000255224	1.18	0.0897	0.0501	1
ENSG00000261799	1.18	-0.168	0.0665	1
ENSG00000283959	1.18	-0.168	0.0665	1
ENSG00000135144	1.17	0.368	0.0388	1
ENSG00000178404	1.16	0.425	0.038	1
ENSG00000280434	1.16	0.601	0.0399	1
ENSG00000144730	1.15	0.225	0.0472	1
ENSG00000158874	1.15	0.225	0.0472	1
ENSG00000178297	1.15	0.288	0.0459	1
ENSG00000115474	1.14	0.0661	0.0589	1
ENSG00000130751	1.14	0.349	0.0447	1
ENSG00000157214	1.14	0.349	0.0447	1
ENSG00000169314	1.14	0.0661	0.0589	1
ENSG00000177406	1.14	0.886	0.0322	1
ENSG00000162576	1.13	0.585	0.0359	1
ENSG00000189001	1.13	0.136	0.0568	1
ENSG00000273344	1.13	0.634	0.0441	1
ENSG00000150672	1.12	0.203	0.0549	1
ENSG00000110811	1.11	0.773	0.0414	1
ENSG00000153064	1.1	0.114	0.0664	1
ENSG00000184110	1.1	2.93	0.0129	1
ENSG00000262877	1.1	0.666	0.0484	1
ENSG00000280067	1.1	0.0421	0.0692	1
ENSG00000008056	1.09	0.182	0.0638	1
ENSG00000172731	1.09	-0.225	0.0955	1
ENSG00000205918	1.09	1.55	0.0246	1
ENSG00000231999	1.09	0.182	0.0638	1
ENSG00000065361	1.08	-0.14	0.0902	1
ENSG00000215912	1.08	0.309	0.0594	1
ENSG00000166359	1.07	-0.0589	0.0855	1
ENSG00000187229	1.07	0.886	0.0433	1
ENSG00000236675	1.07	1.85	0.023	1
ENSG00000248476	1.07	-0.0589	0.0855	1
ENSG00000252947	1.07	0.368	0.0574	1
ENSG00000056736	1.06	0.481	0.0539	1
ENSG00000135119	1.06	0.426	0.0556	1
ENSG00000187791	1.06	3.41	0.0146	1
ENSG00000197566	1.06	0.481	0.0539	1
ENSG00000273033	1.06	1.58	0.028	1
ENSG00000122477	1.05	0.634	0.061	1
ENSG00000126016	1.05	0.225	0.0711	1
ENSG00000163633	1.05	0.159	0.0742	1
ENSG00000257337	1.05	0.873	0.048	1
ENSG00000277149	1.05	1.6	0.0298	1
ENSG00000137818	1.04	7.87	0.0119	1
ENSG00000172936	1.04	4.09	0.0146	1
ENSG00000239388	1.04	-0.255	0.0955	1
ENSG00000261167	1.04	-0.168	0.107	1
ENSG00000214654	1.03	0.568	0.0708	1
ENSG00000105750	1.02	0.137	0.0861	1
ENSG00000162997	1.02	0.0666	0.0904	1
ENSG00000177576	1.02	0.713	0.0642	1
ENSG00000225032	1.01	0.887	0.0574	1
ENSG00000196421	1	0.551	0.0796	1
ENSG00000240132	1	0.551	0.0796	1
ENSG00000124593	0.998	0.602	0.0767	1
ENSG00000083817	0.997	1.21	0.0472	1
ENSG00000108187	0.996	0.651	0.074	1
ENSG00000218510	0.992	1.37	0.0468	1
ENSG00000279901	0.991	0.788	0.0672	1
ENSG00000235961	0.99	-0.196	0.127	1
ENSG00000249465	0.99	-0.196	0.127	1
ENSG00000134061	0.987	-0.112	0.119	1
ENSG00000251194	0.987	-0.112	0.119	1
ENSG00000254503	0.985	-0.0326	0.112	1
ENSG00000261150	0.98	0.182	0.0948	1
ENSG00000256268	0.978	1.33	0.0515	1
ENSG00000076356	0.977	0.309	0.0862	1
ENSG00000139220	0.976	0.369	0.0825	1
ENSG00000188738	0.974	1.52	0.0457	1
ENSG00000214300	0.972	0.585	0.0859	1
ENSG00000143110	0.971	0.635	0.0827	1
ENSG00000196074	0.968	0.859	0.07	1
ENSG00000121769	0.961	1.49	0.0498	1
ENSG00000273002	0.947	1.7	0.0464	1
ENSG00000138363	0.945	3.42	0.0296	1
ENSG00000176383	0.945	0.407	0.0899	1
ENSG00000215067	0.945	0.407	0.0899	1
ENSG00000132554	0.944	-0.0584	0.131	1
ENSG00000228146	0.944	0.0181	0.123	1
ENSG00000246089	0.944	0.16	0.109	1
ENSG00000257354	0.944	0.226	0.104	1
ENSG00000131097	0.943	-0.225	0.127	1
ENSG00000164438	0.943	-0.225	0.127	1
ENSG00000167525	0.932	1.42	0.0596	1
ENSG00000233231	0.929	1.14	0.0675	1
ENSG00000215790	0.928	1.1	0.0692	1
ENSG00000184349	0.925	0.914	0.0799	1
ENSG00000220867	0.924	0.832	0.0853	1
ENSG00000144355	0.922	0.744	0.0916	1
ENSG00000164406	0.922	0.744	0.0916	1
ENSG00000267529	0.916	0.445	0.0974	1
ENSG00000171757	0.915	0.389	0.102	1
ENSG00000171346	0.912	0.268	0.113	1
ENSG00000088053	0.909	1.05	0.0776	1
ENSG00000133808	0.909	1.58	0.0599	1
ENSG00000204618	0.908	0.137	0.126	1
ENSG00000159915	0.901	-0.0846	0.153	1
ENSG00000179869	0.901	-0.0846	0.153	1
ENSG00000183019	0.901	2.29	0.0491	1
ENSG00000111837	0.898	-0.167	0.164	1
ENSG00000175764	0.897	0.683	0.106	1
ENSG00000214922	0.889	0.482	0.126	1
ENSG00000256894	0.889	0.482	0.126	1
ENSG00000121753	0.881	0.31	0.122	1
ENSG00000183562	0.881	0.31	0.122	1
ENSG00000274272	0.881	0.846	0.1	1
ENSG00000138639	0.878	0.248	0.129	1
ENSG00000183891	0.878	1.73	0.0637	1
ENSG00000259953	0.878	0.248	0.129	1
ENSG00000117400	0.874	0.183	0.136	1
ENSG00000161664	0.874	0.714	0.112	1
ENSG00000174292	0.874	0.183	0.136	1
ENSG00000231365	0.874	0.183	0.136	1
ENSG00000122432	0.871	0.115	0.145	1
ENSG00000272655	0.871	0.115	0.145	1
ENSG00000144061	0.866	0.0431	0.155	1
ENSG00000101445	0.864	2.32	0.0579	1
ENSG00000137474	0.862	-0.0321	0.165	1
ENSG00000234040	0.862	-0.0321	0.165	1
ENSG00000196550	0.86	1.16	0.0888	1
ENSG00000235316	0.86	1.8	0.0667	1
ENSG00000096746	0.858	3.64	0.0467	1
ENSG00000128011	0.856	0.408	0.124	1
ENSG00000179397	0.856	1.34	0.0877	1
ENSG00000179523	0.856	-0.111	0.178	1
ENSG00000272625	0.856	-0.111	0.178	1
ENSG00000128594	0.854	1.31	0.09	1
ENSG00000058085	0.85	-0.195	0.192	1
ENSG00000178301	0.85	-0.195	0.192	1
ENSG00000227124	0.85	0.699	0.124	1
ENSG00000253540	0.848	0.98	0.104	1
ENSG00000125434	0.846	0.652	0.13	1
ENSG00000226803	0.845	0.941	0.108	1
ENSG00000128394	0.844	1.57	0.0809	1
ENSG00000171448	0.844	1.73	0.0745	1
ENSG00000181817	0.843	3.38	0.0524	1
ENSG00000270084	0.843	0.603	0.136	1
ENSG00000130812	0.842	1.36	0.0917	1
ENSG00000255864	0.839	0.552	0.143	1
ENSG00000228261	0.838	0.16	0.156	1
ENSG00000246334	0.838	0.16	0.156	1
ENSG00000249863	0.838	0.16	0.156	1
ENSG00000169436	0.836	0.818	0.121	1
ENSG00000184574	0.831	1	0.11	1
ENSG00000063127	0.826	0.0186	0.178	1
ENSG00000178222	0.826	0.0186	0.178	1
ENSG00000120784	0.825	0.389	0.14	1
ENSG00000284024	0.824	1.32	0.101	1
ENSG00000281571	0.821	0.888	0.122	1
ENSG00000100385	0.82	0.33	0.148	1
ENSG00000264630	0.819	-0.0578	0.192	1
ENSG00000161298	0.817	1.55	0.0918	1
ENSG00000169684	0.814	0.269	0.157	1
ENSG00000236581	0.814	0.269	0.157	1
ENSG00000241764	0.814	0.269	0.157	1
ENSG00000163399	0.812	7.74	0.0498	1
ENSG00000146021	0.811	1.62	0.0912	1
ENSG00000175643	0.811	-0.139	0.207	1
ENSG00000189045	0.811	-0.139	0.207	1
ENSG00000261349	0.811	-0.139	0.207	1
ENSG00000273619	0.811	-0.139	0.207	1
ENSG00000276535	0.811	-0.139	0.207	1
ENSG00000255561	0.807	0.954	0.124	1
ENSG00000198521	0.806	0.482	0.168	1
ENSG00000206634	0.806	0.482	0.168	1
ENSG00000178498	0.804	0.715	0.145	1
ENSG00000163449	0.801	2.13	0.0854	1
ENSG00000236423	0.801	0.138	0.178	1
ENSG00000174804	0.8	1.94	0.0826	1
ENSG00000148225	0.799	0.874	0.134	1
ENSG00000159884	0.799	0.668	0.152	1
ENSG00000242419	0.799	0.874	0.134	1
ENSG00000138439	0.796	2.08	0.0897	1
ENSG00000276043	0.796	2.16	0.0864	1
ENSG00000103723	0.795	1.46	0.106	1
ENSG00000232931	0.794	0.37	0.158	1
ENSG00000281896	0.794	0.62	0.159	1
ENSG00000186715	0.793	0.0676	0.191	1
ENSG00000272356	0.793	0.0676	0.191	1
ENSG00000279716	0.788	1.27	0.112	1
ENSG00000113504	0.787	0.31	0.167	1
ENSG00000187554	0.787	0.31	0.167	1
ENSG00000173041	0.786	1.38	0.115	1
ENSG00000124713	0.784	-0.00622	0.205	1
ENSG00000151640	0.784	-0.00622	0.205	1
ENSG00000232504	0.784	-0.00622	0.205	1
ENSG00000259319	0.783	1.08	0.126	1
ENSG00000100197	0.782	0.518	0.177	1
ENSG00000131876	0.782	3.89	0.0681	1
ENSG00000260257	0.782	0.518	0.177	1
ENSG00000120093	0.779	0.699	0.16	1
ENSG00000246363	0.779	0.248	0.178	1
ENSG00000258565	0.775	-0.0841	0.222	1
ENSG00000113790	0.774	2.54	0.0847	1
ENSG00000126603	0.774	2.11	0.0974	1
ENSG00000133313	0.773	6.17	0.0628	1
ENSG00000155792	0.773	0.652	0.168	1
ENSG00000213888	0.771	0.183	0.19	1
ENSG00000227502	0.771	0.183	0.19	1
ENSG00000189337	0.77	2.28	0.0925	1
ENSG00000247572	0.769	0.408	0.198	1
ENSG00000247746	0.768	1.57	0.112	1
ENSG00000250138	0.767	0.603	0.176	1
ENSG00000122223	0.764	-0.166	0.241	1
ENSG00000197467	0.764	-0.166	0.241	1
ENSG00000231177	0.762	0.115	0.203	1
ENSG00000108839	0.761	0.35	0.178	1
ENSG00000158023	0.76	0.553	0.186	1
ENSG00000178789	0.76	0.553	0.186	1
ENSG00000243302	0.757	2.12	0.104	1
ENSG00000173227	0.755	2.04	0.109	1
ENSG00000156298	0.753	0.5	0.196	1
ENSG00000126368	0.752	0.0436	0.219	1
ENSG00000266918	0.752	0.0436	0.219	1
ENSG00000064199	0.751	1.63	0.117	1
ENSG00000118997	0.75	1.22	0.134	1
ENSG00000085465	0.749	0.954	0.154	1
ENSG00000120280	0.749	1.09	0.143	1
ENSG00000169683	0.746	2.48	0.0954	1
ENSG00000181016	0.746	0.446	0.208	1
ENSG00000244509	0.746	2.92	0.0913	1
ENSG00000275180	0.745	1.18	0.139	1
ENSG00000280414	0.744	0.227	0.201	1
ENSG00000269956	0.743	0.915	0.16	1
ENSG00000163702	0.742	0.76	0.175	1
ENSG00000180385	0.742	0.76	0.175	1
ENSG00000263072	0.741	-0.0315	0.236	1
ENSG00000182759	0.74	0.587	0.195	1
ENSG00000186834	0.739	4.92	0.0784	1
ENSG00000179954	0.737	0.389	0.221	1
ENSG00000138411	0.736	1.43	0.137	1
ENSG00000185670	0.736	2.41	0.102	1
ENSG00000141519	0.735	1.59	0.127	1
ENSG00000143552	0.735	1.11	0.149	1
ENSG00000135740	0.734	1.74	0.12	1
ENSG00000175611	0.734	0.161	0.216	1
ENSG00000277363	0.734	0.161	0.216	1
ENSG00000160716	0.733	0.98	0.16	1
ENSG00000153291	0.729	-0.111	0.256	1
ENSG00000170917	0.729	-0.111	0.256	1
ENSG00000248309	0.729	-0.111	0.256	1
ENSG00000262879	0.728	0.331	0.2	1
ENSG00000137404	0.724	1.04	0.16	1
ENSG00000164087	0.724	1.82	0.121	1
ENSG00000189164	0.724	0.79	0.183	1
ENSG00000172209	0.723	0.0918	0.232	1
ENSG00000243679	0.723	1.68	0.129	1
ENSG00000169826	0.718	5.06	0.0865	1
ENSG00000178809	0.718	0.269	0.213	1
ENSG00000203799	0.716	1.1	0.161	1
ENSG00000178623	0.715	0.428	0.231	1
ENSG00000233184	0.714	0.861	0.182	1
ENSG00000255310	0.713	1.28	0.15	1
ENSG00000126803	0.712	0.57	0.215	1
ENSG00000254996	0.712	0.57	0.215	1
ENSG00000221843	0.709	0.7	0.202	1
ENSG00000244627	0.707	0.205	0.228	1
ENSG00000256304	0.707	0.205	0.228	1
ENSG00000269609	0.707	0.819	0.191	1
ENSG00000254634	0.705	0.37	0.21	1
ENSG00000105982	0.703	0.518	0.228	1
ENSG00000196636	0.703	0.518	0.228	1
ENSG00000125863	0.702	3.02	0.109	1
ENSG00000246575	0.701	0.652	0.213	1
ENSG00000101197	0.7	0.775	0.2	1
ENSG00000280407	0.7	0.775	0.2	1
ENSG00000136943	0.698	0.993	0.181	1
ENSG00000099822	0.697	1.09	0.173	1
ENSG00000215319	0.697	-0.0573	0.271	1
ENSG00000197808	0.695	0.138	0.244	1
ENSG00000244687	0.695	2	0.137	1
ENSG00000261924	0.695	0.138	0.244	1
ENSG00000267041	0.695	0.138	0.244	1
ENSG00000002933	0.694	0.311	0.224	1
ENSG00000182795	0.694	0.311	0.224	1
ENSG00000253106	0.694	0.311	0.224	1
ENSG00000280069	0.694	0.311	0.224	1
ENSG00000173581	0.693	1.64	0.148	1
ENSG00000178093	0.693	0.604	0.225	1
ENSG00000235253	0.693	0.604	0.225	1
ENSG00000164989	0.692	1.82	0.138	1
ENSG00000170545	0.688	2.01	0.14	1
ENSG00000143028	0.685	2.23	0.137	1
ENSG00000099864	0.684	1.59	0.156	1
ENSG00000174669	0.684	1.2	0.172	1
ENSG00000186510	0.683	0.249	0.24	1
ENSG00000219470	0.683	0.249	0.24	1
ENSG00000157212	0.682	2.21	0.139	1
ENSG00000261371	0.68	5.6	0.102	1
ENSG00000134248	0.679	5.29	0.104	1
ENSG00000162643	0.676	0.875	0.206	1
ENSG00000171121	0.675	0.761	0.219	1
ENSG00000255585	0.674	0.636	0.234	1
ENSG00000134571	0.672	1.71	0.156	1
ENSG00000137266	0.672	0.351	0.235	1
ENSG00000229808	0.672	0.351	0.235	1
ENSG00000172345	0.668	1.74	0.156	1
ENSG00000234231	0.668	2.3	0.143	1
ENSG00000142657	0.667	8.88	0.106	1
ENSG00000156103	0.665	0.587	0.247	1
ENSG00000196376	0.665	0.587	0.247	1
ENSG00000127507	0.663	4.64	0.116	1
ENSG00000196757	0.661	2.01	0.156	1
ENSG00000102024	0.66	2.29	0.148	1
ENSG00000237719	0.66	0.29	0.251	1
ENSG00000054392	0.659	1.7	0.165	1
ENSG00000162888	0.659	1.16	0.192	1
ENSG00000213145	0.659	1.16	0.192	1
ENSG00000131196	0.658	3.93	0.122	1
ENSG00000050730	0.657	0.669	0.243	1
ENSG00000080603	0.657	2.28	0.151	1
ENSG00000185818	0.656	1.94	0.164	1
ENSG00000089505	0.651	0.39	0.285	1
ENSG00000112246	0.651	0.39	0.285	1
ENSG00000163958	0.651	-0.0835	0.31	1
ENSG00000167182	0.651	2.01	0.163	1
ENSG00000168672	0.651	1.54	0.18	1
ENSG00000251484	0.651	-0.0835	0.31	1
ENSG00000283050	0.651	-0.0835	0.31	1
ENSG00000140025	0.65	0.746	0.239	1
ENSG00000158691	0.65	1.27	0.19	1
ENSG00000104147	0.646	0.227	0.269	1
ENSG00000152422	0.646	2.46	0.149	1
ENSG00000196975	0.646	5.51	0.121	1
ENSG00000182749	0.645	1.09	0.208	1
ENSG00000064547	0.644	4.6	0.127	1
ENSG00000148841	0.642	5.62	0.123	1
ENSG00000258183	0.642	0.993	0.219	1
ENSG00000183682	0.641	1.15	0.206	1
ENSG00000224505	0.641	0.0441	0.299	1
ENSG00000239445	0.641	0.0441	0.299	1
ENSG00000240288	0.641	0.0441	0.299	1
ENSG00000238278	0.64	1.49	0.191	1
ENSG00000086062	0.639	6.45	0.123	1
ENSG00000140443	0.639	1.6	0.184	1
ENSG00000140836	0.637	2.76	0.152	1
ENSG00000103528	0.636	0.57	0.272	1
ENSG00000138311	0.636	3.34	0.141	1
ENSG00000156050	0.636	1.2	0.204	1
ENSG00000115556	0.635	0.776	0.247	1
ENSG00000118898	0.635	1.93	0.179	1
ENSG00000124839	0.635	2.45	0.156	1
ENSG00000132669	0.635	2.45	0.156	1
ENSG00000118513	0.634	0.955	0.229	1
ENSG00000066248	0.633	2.9	0.153	1
ENSG00000258111	0.632	0.161	0.29	1
ENSG00000122417	0.627	3.44	0.146	1
ENSG00000213199	0.626	1.8	0.181	1
ENSG00000100348	0.625	4.06	0.142	1
ENSG00000119943	0.625	1.08	0.224	1
ENSG00000143578	0.625	2.54	0.164	1
ENSG00000186854	0.625	0.916	0.24	1
ENSG00000198453	0.625	1.08	0.224	1
ENSG00000058335	0.624	3.03	0.153	1
ENSG00000099338	0.623	-0.031	0.325	1
ENSG00000184343	0.621	1.87	0.18	1
ENSG00000231296	0.621	1.14	0.221	1
ENSG00000103241	0.619	0.604	0.281	1
ENSG00000189376	0.619	2.31	0.174	1
ENSG00000234292	0.619	0.604	0.281	1
ENSG00000176472	0.618	0.371	0.316	1
ENSG00000178966	0.617	1.61	0.199	1
ENSG00000182405	0.617	1.85	0.184	1
ENSG00000196411	0.616	1.38	0.219	1
ENSG00000058056	0.615	3.61	0.154	1
ENSG00000103550	0.613	1.69	0.197	1
ENSG00000135249	0.612	4.55	0.145	1
ENSG00000137809	0.612	1.3	0.215	1
ENSG00000196646	0.612	2.37	0.176	1
ENSG00000223768	0.61	1.47	0.215	1
ENSG00000010310	0.609	3.25	0.162	1
ENSG00000115687	0.609	2.56	0.174	1
ENSG00000166816	0.609	1.63	0.204	1
ENSG00000215302	0.609	0.206	0.302	1
ENSG00000006283	0.608	2.09	0.195	1
ENSG00000100276	0.608	1.01	0.244	1
ENSG00000083828	0.606	2.22	0.188	1
ENSG00000174370	0.606	1.93	0.199	1
ENSG00000219665	0.606	0.833	0.264	1
ENSG00000136938	0.605	2.43	0.178	1
ENSG00000230724	0.605	1.96	0.198	1
ENSG00000176273	0.604	-0.11	0.354	1
ENSG00000223804	0.604	-0.11	0.354	1
ENSG00000254013	0.603	0.311	0.293	1
ENSG00000179151	0.602	3.96	0.158	1
ENSG00000204257	0.602	2.3	0.187	1
ENSG00000121690	0.6	2.06	0.196	1
ENSG00000177685	0.599	2.54	0.182	1
ENSG00000213638	0.598	0.0197	0.339	1
ENSG00000228265	0.598	0.409	0.327	1
ENSG00000174977	0.597	1.24	0.231	1
ENSG00000102103	0.596	4.31	0.158	1
ENSG00000198711	0.596	1.03	0.251	1
ENSG00000259657	0.596	1.03	0.251	1
ENSG00000279382	0.596	1.76	0.205	1
ENSG00000100376	0.594	2.64	0.188	1
ENSG00000245958	0.594	2.07	0.207	1
ENSG00000124772	0.592	0.139	0.326	1
ENSG00000151773	0.592	1.7	0.212	1
ENSG00000278330	0.592	0.139	0.326	1
ENSG00000273329	0.59	2.39	0.191	1
ENSG00000144026	0.589	2.18	0.203	1
ENSG00000136688	0.588	0.249	0.315	1
ENSG00000163293	0.587	1.68	0.218	1
ENSG00000204228	0.587	1.26	0.238	1
ENSG00000263874	0.585	1.72	0.216	1
ENSG00000272645	0.585	1.53	0.231	1
ENSG00000123500	0.582	0.819	0.286	1
ENSG00000228638	0.582	1.61	0.226	1
ENSG00000258875	0.582	0.819	0.286	1
ENSG00000118640	0.58	5.25	0.164	1
ENSG00000126453	0.58	3.44	0.178	1
ENSG00000215158	0.579	1.23	0.247	1
ENSG00000171992	0.578	-0.0568	0.369	1
ENSG00000253230	0.578	2.23	0.209	1
ENSG00000139618	0.577	2.42	0.199	1
ENSG00000158473	0.577	1.96	0.22	1
ENSG00000120896	0.575	2.83	0.193	1
ENSG00000230177	0.575	0.621	0.317	1
ENSG00000259172	0.575	0.621	0.317	1
ENSG00000275379	0.575	2.72	0.198	1
ENSG00000154839	0.574	0.0687	0.352	1
ENSG00000173928	0.574	0.0687	0.352	1
ENSG00000188707	0.574	0.0687	0.352	1
ENSG00000241058	0.574	1.38	0.253	1
ENSG00000265148	0.573	1.43	0.249	1
ENSG00000004468	0.572	0.7	0.309	1
ENSG00000068650	0.572	5.89	0.168	1
ENSG00000135298	0.572	0.7	0.309	1
ENSG00000159905	0.572	1.71	0.227	1
ENSG00000174028	0.572	2.14	0.22	1
ENSG00000226221	0.572	0.7	0.309	1
ENSG00000273748	0.572	0.7	0.309	1
ENSG00000114737	0.571	2.64	0.206	1
ENSG00000167895	0.571	2.32	0.209	1
ENSG00000162396	0.57	2.39	0.206	1
ENSG00000233436	0.57	0.776	0.301	1
ENSG00000265982	0.569	0.848	0.294	1
ENSG00000183935	0.568	1.6	0.239	1
ENSG00000281207	0.568	0.291	0.326	1
ENSG00000103494	0.565	1.72	0.232	1
ENSG00000169925	0.565	3.34	0.191	1
ENSG00000179598	0.565	1.4	0.258	1
ENSG00000112137	0.564	2.29	0.217	1
ENSG00000128283	0.563	1.49	0.252	1
ENSG00000134369	0.561	5.08	0.18	1
ENSG00000182487	0.561	2.17	0.227	1
ENSG00000186891	0.561	0.571	0.337	1
ENSG00000164920	0.56	0.653	0.327	1
ENSG00000113327	0.559	1.27	0.26	1
ENSG00000255031	0.559	2.3	0.221	1
ENSG00000215154	0.557	0.805	0.31	1
ENSG00000137338	0.556	1.46	0.261	1
ENSG00000179958	0.556	2.9	0.205	1
ENSG00000267278	0.556	1.88	0.243	1
ENSG00000161681	0.555	3.41	0.196	1
ENSG00000157613	0.554	-0.00516	0.383	1
ENSG00000203872	0.554	-0.00516	0.383	1
ENSG00000099904	0.553	4.53	0.188	1
ENSG00000184545	0.553	1.64	0.248	1
ENSG00000027869	0.552	1.72	0.243	1
ENSG00000271780	0.552	0.116	0.366	1
ENSG00000088538	0.551	2.61	0.225	1
ENSG00000175193	0.551	1.79	0.239	1
ENSG00000266835	0.551	1.18	0.274	1
ENSG00000124098	0.55	3.11	0.21	1
ENSG00000145284	0.55	2.67	0.222	1
ENSG00000137601	0.549	3.6	0.2	1
ENSG00000138380	0.549	1.39	0.274	1
ENSG00000162804	0.549	1.99	0.241	1
ENSG00000281490	0.549	3.58	0.201	1
ENSG00000049769	0.548	1.48	0.266	1
ENSG00000156384	0.548	1.53	0.263	1
ENSG00000168303	0.548	2.84	0.214	1
ENSG00000177732	0.548	3.07	0.207	1
ENSG00000217801	0.548	0.428	0.371	1
ENSG00000137185	0.547	2.2	0.237	1
ENSG00000214293	0.547	0.519	0.358	1
ENSG00000258199	0.547	0.519	0.358	1
ENSG00000258920	0.547	0.519	0.358	1
ENSG00000241859	0.546	0.685	0.336	1
ENSG00000257335	0.546	1.69	0.251	1
ENSG00000096060	0.544	4.75	0.194	1
ENSG00000104714	0.544	2.56	0.225	1
ENSG00000174238	0.544	5.63	0.191	1
ENSG00000184838	0.543	3.75	0.206	1
ENSG00000165698	0.542	1.09	0.291	1
ENSG00000179855	0.542	2.9	0.216	1
ENSG00000270055	0.542	1.21	0.281	1
ENSG00000270362	0.542	1.15	0.286	1
ENSG00000228452	0.541	1.36	0.268	1
ENSG00000137142	0.54	1.5	0.272	1
ENSG00000164742	0.54	4.66	0.197	1
ENSG00000226435	0.54	1.5	0.272	1
ENSG00000138185	0.539	1.67	0.258	1
ENSG00000143443	0.539	1.82	0.248	1
ENSG00000149564	0.539	1.67	0.258	1
ENSG00000164118	0.537	2.6	0.238	1
ENSG00000076555	0.536	3.13	0.221	1
ENSG00000242086	0.535	3.35	0.215	1
ENSG00000166833	0.533	1.76	0.257	1
ENSG00000168826	0.533	1.83	0.252	1
ENSG00000260912	0.533	1.43	0.285	1
ENSG00000102271	0.532	0.929	0.318	1
ENSG00000106327	0.532	0.371	0.397	1
ENSG00000142731	0.532	0.791	0.335	1
ENSG00000154930	0.532	0.716	0.345	1
ENSG00000160172	0.532	0.554	0.368	1
ENSG00000163617	0.532	1.12	0.298	1
ENSG00000187010	0.532	0.465	0.381	1
ENSG00000235092	0.532	0.862	0.326	1
ENSG00000235884	0.532	1.06	0.304	1
ENSG00000246100	0.532	0.371	0.397	1
ENSG00000100027	0.531	-0.083	0.418	1
ENSG00000136867	0.531	0.0447	0.397	1
ENSG00000163701	0.531	0.162	0.379	1
ENSG00000180610	0.531	-0.083	0.418	1
ENSG00000189149	0.531	0.0447	0.397	1
ENSG00000222365	0.531	0.0447	0.397	1
ENSG00000225335	0.531	0.0447	0.397	1
ENSG00000230071	0.531	0.0447	0.397	1
ENSG00000237438	0.531	0.0447	0.397	1
ENSG00000250474	0.531	-0.083	0.418	1
ENSG00000250644	0.531	0.27	0.363	1
ENSG00000280927	0.531	0.0447	0.397	1
ENSG00000179409	0.529	3.18	0.225	1
ENSG00000186431	0.529	4.42	0.21	1
ENSG00000169908	0.528	2.13	0.259	1
ENSG00000177989	0.528	2.07	0.254	1
ENSG00000205593	0.528	2.1	0.261	1
ENSG00000110104	0.527	2.85	0.231	1
ENSG00000172748	0.527	1.78	0.262	1
ENSG00000176919	0.526	1.66	0.271	1
ENSG00000268049	0.526	1.74	0.265	1
ENSG00000248996	0.525	1.54	0.282	1
ENSG00000255455	0.525	1.49	0.287	1
ENSG00000267169	0.525	1.58	0.278	1
ENSG00000150401	0.524	2.79	0.238	1
ENSG00000141252	0.523	4.29	0.216	1
ENSG00000171533	0.523	1.14	0.305	1
ENSG00000172031	0.523	2.14	0.263	1
ENSG00000205544	0.523	1.19	0.299	1
ENSG00000257594	0.523	1.19	0.299	1
ENSG00000107537	0.522	3.5	0.228	1
ENSG00000159231	0.521	0.956	0.326	1
ENSG00000155749	0.52	0.889	0.334	1
ENSG00000258090	0.52	0.82	0.344	1
ENSG00000120647	0.519	2.87	0.238	1
ENSG00000175463	0.518	1.55	0.288	1
ENSG00000198646	0.518	4.81	0.218	1
ENSG00000177873	0.517	3.01	0.237	1
ENSG00000158104	0.516	0.502	0.392	1
ENSG00000182700	0.516	1.91	0.278	1
ENSG00000198468	0.516	0.502	0.392	1
ENSG00000253250	0.516	0.502	0.392	1
ENSG00000167978	0.515	7.45	0.212	1
ENSG00000205181	0.513	1.16	0.312	1
ENSG00000099377	0.512	1.1	0.319	1
ENSG00000167550	0.512	0.206	0.391	1
ENSG00000232053	0.512	0.206	0.391	1
ENSG00000272693	0.512	0.206	0.391	1
ENSG00000009830	0.511	3.74	0.234	1
ENSG00000196329	0.511	1.04	0.326	1
ENSG00000122507	0.51	3.21	0.244	1
ENSG00000177427	0.51	3.06	0.241	1
ENSG00000261490	0.51	0.0928	0.41	1
ENSG00000095539	0.508	-0.0305	0.432	1
ENSG00000111602	0.508	3.73	0.237	1
ENSG00000145824	0.508	-0.0305	0.432	1
ENSG00000178127	0.508	1.39	0.313	1
ENSG00000178935	0.508	2.12	0.279	1
ENSG00000185522	0.508	0.848	0.352	1
ENSG00000186868	0.508	-0.0305	0.432	1
ENSG00000228192	0.508	-0.0305	0.432	1
ENSG00000235852	0.508	0.848	0.352	1
ENSG00000262814	0.508	0.848	0.352	1
ENSG00000181830	0.507	3.03	0.245	1
ENSG00000196367	0.506	6.11	0.222	1
ENSG00000198870	0.505	0.701	0.374	1
ENSG00000254122	0.505	1.24	0.312	1
ENSG00000263142	0.505	1.24	0.312	1
ENSG00000142798	0.503	5.8	0.225	1
ENSG00000237973	0.502	2.46	0.261	1
ENSG00000178343	0.501	1.76	0.287	1
ENSG00000232860	0.501	0.537	0.401	1
ENSG00000278048	0.501	1.07	0.333	1
ENSG00000182379	0.5	1.01	0.341	1
ENSG00000254909	0.5	1.01	0.341	1
ENSG00000037897	0.499	3.31	0.25	1
ENSG00000154864	0.499	0.447	0.418	1
ENSG00000167964	0.498	1.64	0.299	1
ENSG00000132485	0.497	5.17	0.234	1
ENSG00000197016	0.497	1.6	0.303	1
ENSG00000128805	0.496	2.35	0.275	1
ENSG00000170653	0.495	3.79	0.246	1
ENSG00000196378	0.495	1.99	0.291	1
ENSG00000113460	0.494	3.68	0.249	1
ENSG00000228327	0.494	2.13	0.292	1
ENSG00000116874	0.493	2.66	0.275	1
ENSG00000126953	0.493	1.9	0.301	1
ENSG00000151687	0.493	1.15	0.332	1
ENSG00000159761	0.493	0.732	0.383	1
ENSG00000282508	0.493	0.732	0.383	1
ENSG00000267123	0.492	1.66	0.304	1
ENSG00000012174	0.491	3.53	0.255	1
ENSG00000122870	0.491	2.91	0.262	1
ENSG00000135457	0.491	4.46	0.243	1
ENSG00000149948	0.491	4.78	0.241	1
ENSG00000213859	0.491	2.19	0.29	1
ENSG00000224411	0.491	2.92	0.261	1
ENSG00000087338	0.49	4.56	0.245	1
ENSG00000140534	0.49	0.654	0.396	1
ENSG00000166343	0.49	1.58	0.313	1
ENSG00000205664	0.49	1.58	0.313	1
ENSG00000268350	0.49	1.03	0.349	1
ENSG00000279010	0.49	1.03	0.349	1
ENSG00000105928	0.488	5.39	0.241	1
ENSG00000147437	0.488	0.969	0.358	1
ENSG00000150991	0.488	0.969	0.358	1
ENSG00000157388	0.488	0.571	0.411	1
ENSG00000163485	0.488	0.571	0.411	1
ENSG00000165475	0.488	4.01	0.253	1
ENSG00000171989	0.488	0.571	0.411	1
ENSG00000188001	0.488	0.571	0.411	1
ENSG00000262943	0.488	0.571	0.411	1
ENSG00000056998	0.487	2.05	0.295	1
ENSG00000172915	0.487	1.72	0.304	1
ENSG00000175073	0.487	6.44	0.239	1
ENSG00000201302	0.487	0.0202	0.445	1
ENSG00000153317	0.485	8.33	0.239	1
ENSG00000188549	0.485	1.64	0.313	1
ENSG00000213928	0.485	2.53	0.274	1
ENSG00000212907	0.484	6.5	0.242	1
ENSG00000105808	0.483	2.22	0.297	1
ENSG00000125650	0.483	0.834	0.379	1
ENSG00000242028	0.483	1.12	0.347	1
ENSG00000198857	0.481	3.5	0.266	1
ENSG00000214900	0.481	2.95	0.275	1
ENSG00000222489	0.481	3.93	0.257	1
ENSG00000161558	0.48	1.3	0.331	1
ENSG00000090061	0.479	2.34	0.292	1
ENSG00000076928	0.478	6.54	0.247	1
ENSG00000187068	0.478	1.25	0.338	1
ENSG00000205238	0.478	1.25	0.338	1
ENSG00000112033	0.477	7.59	0.247	1
ENSG00000100058	0.476	2.38	0.293	1
ENSG00000100918	0.475	2.98	0.28	1
ENSG00000143882	0.475	1.57	0.329	1
ENSG00000174628	0.475	0.93	0.376	1
ENSG00000183091	0.475	2.24	0.304	1
ENSG00000065675	0.474	0.605	0.42	1
ENSG00000131504	0.474	7.04	0.25	1
ENSG00000159917	0.474	1.14	0.354	1
ENSG00000168813	0.474	3.3	0.275	1
ENSG00000178971	0.474	4.56	0.26	1
ENSG00000179743	0.474	1.14	0.354	1
ENSG00000184949	0.474	0.605	0.42	1
ENSG00000143412	0.473	2.65	0.296	1
ENSG00000243554	0.473	1.53	0.335	1
ENSG00000269343	0.473	2.09	0.306	1
ENSG00000142303	0.471	1.08	0.363	1
ENSG00000148400	0.471	8.37	0.252	1
ENSG00000171189	0.471	1.08	0.363	1
ENSG00000270379	0.471	1.08	0.363	1
ENSG00000170043	0.47	3.62	0.272	1
ENSG00000086848	0.469	0.791	0.4	1
ENSG00000198203	0.469	3.2	0.281	1
ENSG00000267890	0.469	0.791	0.4	1
ENSG00000129226	0.467	0.0692	0.458	1
ENSG00000168785	0.467	3.11	0.288	1
ENSG00000181458	0.467	1.39	0.337	1
ENSG00000072422	0.466	2.04	0.318	1
ENSG00000118298	0.466	1.68	0.328	1
ENSG00000153157	0.466	0.716	0.414	1
ENSG00000275183	0.466	0.716	0.414	1
ENSG00000197050	0.465	0.956	0.383	1
ENSG00000037757	0.464	2.92	0.288	1
ENSG00000204149	0.463	2.91	0.29	1
ENSG00000226752	0.463	1.97	0.326	1
ENSG00000126562	0.462	0.638	0.429	1
ENSG00000171368	0.462	1.29	0.351	1
ENSG00000090659	0.461	2.54	0.298	1
ENSG00000104883	0.461	-0.0562	0.485	1
ENSG00000163867	0.461	1.83	0.341	1
ENSG00000172236	0.461	-0.0562	0.485	1
ENSG00000189350	0.461	-0.0562	0.485	1
ENSG00000229931	0.461	-0.0562	0.485	1
ENSG00000241741	0.461	-0.0562	0.485	1
ENSG00000254285	0.461	-0.0562	0.485	1
ENSG00000160410	0.46	6.05	0.267	1
ENSG00000196689	0.46	1.24	0.359	1
ENSG00000123146	0.459	6.43	0.267	1
ENSG00000263826	0.459	1.91	0.335	1
ENSG00000250479	0.458	3.21	0.291	1
ENSG00000147383	0.457	3.84	0.283	1
ENSG00000214029	0.457	1.36	0.349	1
ENSG00000242498	0.457	1.36	0.349	1
ENSG00000276337	0.457	0.554	0.447	1
ENSG00000279412	0.457	2.78	0.304	1
ENSG00000134253	0.456	0.228	0.446	1
ENSG00000185862	0.456	4.1	0.281	1
ENSG00000272037	0.456	0.228	0.446	1
ENSG00000157514	0.455	3.28	0.295	1
ENSG00000136206	0.454	0.747	0.422	1
ENSG00000149243	0.454	1.58	0.351	1
ENSG00000165731	0.454	3.66	0.286	1
ENSG00000166896	0.452	1.54	0.358	1
ENSG00000182600	0.452	0.466	0.466	1
ENSG00000205744	0.452	3.21	0.298	1
ENSG00000260267	0.452	2.39	0.317	1
ENSG00000260924	0.452	0.917	0.403	1
ENSG00000281195	0.452	0.917	0.403	1
ENSG00000270194	0.451	1.77	0.337	1
ENSG00000123810	0.45	1.38	0.355	1
ENSG00000156239	0.45	1.07	0.387	1
ENSG00000162068	0.45	0.67	0.438	1
ENSG00000169570	0.45	2.55	0.308	1
ENSG00000198886	0.45	9.13	0.274	1
ENSG00000174788	0.449	1.21	0.374	1
ENSG00000181036	0.449	0.117	0.47	1
ENSG00000196547	0.449	5.57	0.28	1
ENSG00000235358	0.449	0.117	0.47	1
ENSG00000237149	0.449	2.01	0.338	1
ENSG00000069812	0.448	0.848	0.416	1
ENSG00000081052	0.447	2.61	0.327	1
ENSG00000197182	0.447	4.04	0.294	1
ENSG00000198753	0.447	1.33	0.363	1
ENSG00000090020	0.446	5.97	0.282	1
ENSG00000180096	0.446	1.01	0.398	1
ENSG00000198556	0.446	2.54	0.314	1
ENSG00000068354	0.445	4.26	0.292	1
ENSG00000102057	0.445	2.26	0.334	1
ENSG00000163517	0.445	1.87	0.354	1
ENSG00000175489	0.445	2.46	0.32	1
ENSG00000185986	0.445	0.588	0.456	1
ENSG00000197635	0.445	1.95	0.347	1
ENSG00000166250	0.444	2.88	0.312	1
ENSG00000204922	0.444	1.28	0.371	1
ENSG00000011451	0.442	4.82	0.292	1
ENSG00000174206	0.442	3.13	0.314	1
ENSG00000074660	0.441	2.83	0.318	1
ENSG00000135148	0.441	5.67	0.288	1
ENSG00000152078	0.441	-0.00463	0.498	1
ENSG00000155542	0.441	1.09	0.394	1
ENSG00000168679	0.441	-0.00463	0.498	1
ENSG00000172543	0.441	1.71	0.353	1
ENSG00000204584	0.441	-0.00463	0.498	1
ENSG00000228663	0.441	-0.00463	0.498	1
ENSG00000283341	0.441	-0.00463	0.498	1
ENSG00000089123	0.44	1.47	0.378	1
ENSG00000123427	0.44	3.31	0.31	1
ENSG00000185513	0.44	2.95	0.312	1
ENSG00000228076	0.44	0.271	0.514	1
ENSG00000044574	0.439	7.21	0.288	1
ENSG00000134245	0.439	1.76	0.352	1
ENSG00000139537	0.439	0.502	0.476	1
ENSG00000108091	0.438	5.36	0.293	1
ENSG00000167965	0.438	4.04	0.303	1
ENSG00000188747	0.438	0.701	0.447	1
ENSG00000272825	0.438	2.08	0.345	1
ENSG00000090661	0.437	3.94	0.307	1
ENSG00000164776	0.437	1.3	0.377	1
ENSG00000254635	0.437	1.3	0.377	1
ENSG00000144218	0.436	1.53	0.375	1
ENSG00000173511	0.436	4.41	0.3	1
ENSG00000104889	0.434	2.47	0.332	1
ENSG00000127993	0.434	3.22	0.317	1
ENSG00000108405	0.433	4.1	0.305	1
ENSG00000112796	0.433	0.622	0.465	1
ENSG00000124074	0.433	3.14	0.323	1
ENSG00000142856	0.433	1.37	0.375	1
ENSG00000143257	0.433	1.48	0.383	1
ENSG00000161277	0.433	0.622	0.465	1
ENSG00000169604	0.433	1.59	0.373	1
ENSG00000169715	0.433	0.969	0.418	1
ENSG00000177575	0.433	0.969	0.418	1
ENSG00000120457	0.432	0.162	0.482	1
ENSG00000157017	0.432	0.41	0.498	1
ENSG00000171425	0.432	2.5	0.331	1
ENSG00000178803	0.432	0.41	0.498	1
ENSG00000238086	0.432	0.162	0.482	1
ENSG00000260005	0.432	0.162	0.482	1
ENSG00000144481	0.431	1.91	0.366	1
ENSG00000149474	0.431	1.74	0.363	1
ENSG00000126861	0.43	1.55	0.381	1
ENSG00000132510	0.43	5.13	0.303	1
ENSG00000146858	0.43	1.44	0.392	1
ENSG00000162931	0.43	1.44	0.392	1
ENSG00000009790	0.429	2.03	0.358	1
ENSG00000041880	0.429	2.39	0.342	1
ENSG00000107438	0.429	1.06	0.412	1
ENSG00000152932	0.429	1.06	0.412	1
ENSG00000203772	0.429	1.06	0.412	1
ENSG00000187555	0.428	6.66	0.3	1
ENSG00000203727	0.427	0.732	0.455	1
ENSG00000265479	0.426	1.39	0.381	1
ENSG00000047634	0.425	2.6	0.344	1
ENSG00000072071	0.425	4.68	0.312	1
ENSG00000228816	0.425	0.312	0.524	1
ENSG00000125966	0.424	1.89	0.377	1
ENSG00000160111	0.424	1.46	0.397	1
ENSG00000198089	0.424	4.53	0.312	1
ENSG00000104432	0.423	1.34	0.389	1
ENSG00000111846	0.423	2.94	0.331	1
ENSG00000115652	0.423	6.47	0.306	1
ENSG00000139714	0.423	0.0452	0.51	1
ENSG00000188820	0.423	1.81	0.385	1
ENSG00000203896	0.423	1.34	0.389	1
ENSG00000135245	0.422	1.22	0.403	1
ENSG00000147601	0.422	3.96	0.323	1
ENSG00000184524	0.421	0.654	0.473	1
ENSG00000127995	0.42	3.65	0.324	1
ENSG00000181666	0.42	2.93	0.336	1
ENSG00000260917	0.42	1.08	0.419	1
ENSG00000162144	0.419	5.63	0.313	1
ENSG00000173221	0.418	4.13	0.325	1
ENSG00000178726	0.418	4.65	0.321	1
ENSG00000224660	0.418	2.64	0.357	1
ENSG00000109686	0.417	1.16	0.414	1
ENSG00000136010	0.417	3.34	0.334	1
ENSG00000253210	0.417	1.73	0.378	1
ENSG00000185261	0.416	1.36	0.395	1
ENSG00000196569	0.416	2.34	0.36	1
ENSG00000226259	0.416	1.36	0.395	1
ENSG00000278600	0.416	1.36	0.395	1
ENSG00000084112	0.415	5.33	0.319	1
ENSG00000090975	0.415	3.37	0.335	1
ENSG00000100154	0.415	5.21	0.32	1
ENSG00000176896	0.415	1.02	0.432	1
ENSG00000188211	0.415	1.02	0.432	1
ENSG00000228526	0.415	1.02	0.432	1
ENSG00000185291	0.414	3.49	0.341	1
ENSG00000278129	0.414	1.69	0.386	1
ENSG00000166963	0.413	1.96	0.383	1
ENSG00000187790	0.413	2.78	0.353	1
ENSG00000233922	0.413	0.863	0.454	1
ENSG00000009950	0.412	1.88	0.391	1
ENSG00000204673	0.412	5.04	0.323	1
ENSG00000260852	0.412	1.1	0.426	1
ENSG00000105662	0.411	3.83	0.334	1
ENSG00000175395	0.411	2.42	0.361	1
ENSG00000177082	0.411	2.33	0.368	1
ENSG00000100652	0.41	0.686	0.481	1
ENSG00000108622	0.41	0.956	0.446	1
ENSG00000116885	0.41	1.18	0.42	1
ENSG00000203666	0.41	1.18	0.42	1
ENSG00000268218	0.41	0.686	0.481	1
ENSG00000272821	0.41	0.686	0.481	1
ENSG00000104946	0.409	4.46	0.334	1
ENSG00000122122	0.409	2.3	0.372	1
ENSG00000153071	0.409	7.11	0.321	1
ENSG00000163040	0.409	1.98	0.387	1
ENSG00000178852	0.409	3.52	0.345	1
ENSG00000184857	0.409	1.38	0.401	1
ENSG00000254893	0.409	1.38	0.401	1
ENSG00000136367	0.408	2.86	0.354	1
ENSG00000144028	0.408	7.49	0.322	1
ENSG00000185347	0.408	2.24	0.379	1
ENSG00000234585	0.408	2.13	0.388	1
ENSG00000099834	0.407	0.792	0.471	1
ENSG00000136696	0.407	0.484	0.517	1
ENSG00000174928	0.407	1.76	0.388	1
ENSG00000180185	0.407	3.09	0.356	1
ENSG00000250067	0.407	0.484	0.517	1
ENSG00000265206	0.407	2.55	0.369	1
ENSG00000281376	0.407	0.484	0.517	1
ENSG00000144559	0.406	1.81	0.405	1
ENSG00000179715	0.406	0.0933	0.522	1
ENSG00000184730	0.406	3.95	0.342	1
ENSG00000261442	0.406	0.0933	0.522	1
ENSG00000283154	0.406	0.0933	0.522	1
ENSG00000131480	0.405	1.33	0.411	1
ENSG00000149635	0.405	4.61	0.336	1
ENSG00000134371	0.404	5.6	0.331	1
ENSG00000006757	0.403	1.4	0.407	1
ENSG00000089723	0.403	2.83	0.362	1
ENSG00000160325	0.403	3.65	0.343	1
ENSG00000179820	0.403	3.59	0.348	1
ENSG00000124942	0.402	8.48	0.329	1
ENSG00000132801	0.402	2.72	0.371	1
ENSG00000136213	0.402	3.73	0.35	1
ENSG00000141378	0.402	3.44	0.353	1
ENSG00000163933	0.402	4.64	0.339	1
ENSG00000105374	0.401	0.25	0.564	1
ENSG00000154447	0.401	5.24	0.336	1
ENSG00000156265	0.401	0.25	0.564	1
ENSG00000157870	0.401	4.25	0.342	1
ENSG00000176473	0.401	2.36	0.377	1
ENSG00000204271	0.401	1.83	0.41	1
ENSG00000259950	0.401	0.25	0.564	1
ENSG00000101084	0.4	2.3	0.384	1
ENSG00000139971	0.4	0.717	0.49	1
ENSG00000161653	0.4	1.53	0.419	1
ENSG00000186654	0.4	1.53	0.419	1
ENSG00000221909	0.4	1.28	0.421	1
ENSG00000099940	0.399	4.79	0.341	1
ENSG00000115539	0.399	2.46	0.373	1
ENSG00000188167	0.399	3.37	0.354	1
ENSG00000269937	0.399	2.42	0.374	1
ENSG00000138316	0.398	1.35	0.417	1
ENSG00000198910	0.398	3.19	0.361	1
ENSG00000205309	0.398	0.391	0.543	1
ENSG00000136295	0.397	7.51	0.335	1
ENSG00000262406	0.397	1.15	0.439	1
ENSG00000182578	0.396	6.76	0.337	1
ENSG00000075213	0.395	3.14	0.367	1
ENSG00000111186	0.395	0.52	0.526	1
ENSG00000124313	0.395	3.94	0.355	1
ENSG00000124570	0.395	3.86	0.352	1
ENSG00000154914	0.395	0.52	0.526	1
ENSG00000159784	0.395	3.65	0.353	1
ENSG00000166582	0.395	1.7	0.407	1
ENSG00000268912	0.395	0.917	0.469	1
ENSG00000007129	0.394	-0.0299	0.556	1
ENSG00000079435	0.394	-0.0299	0.556	1
ENSG00000186687	0.394	2.77	0.378	1
ENSG00000222011	0.394	1.94	0.408	1
ENSG00000106610	0.393	2.32	0.39	1
ENSG00000167548	0.393	6.11	0.343	1
ENSG00000188603	0.393	1.01	0.46	1
ENSG00000169607	0.392	0.638	0.51	1
ENSG00000206573	0.392	2.51	0.377	1
ENSG00000258944	0.392	0.638	0.51	1
ENSG00000096996	0.391	1.44	0.439	1
ENSG00000097096	0.391	3.1	0.375	1
ENSG00000099977	0.391	2.29	0.395	1
ENSG00000111816	0.391	1.09	0.452	1
ENSG00000119965	0.391	2.29	0.395	1
ENSG00000143847	0.391	2.67	0.388	1
ENSG00000144677	0.391	3.1	0.375	1
ENSG00000259781	0.391	1.09	0.452	1
ENSG00000020922	0.39	3.78	0.362	1
ENSG00000131400	0.39	0.747	0.497	1
ENSG00000145781	0.39	3.46	0.366	1
ENSG00000148606	0.39	5.27	0.35	1
ENSG00000162385	0.39	3.73	0.365	1
ENSG00000249978	0.39	0.14	0.533	1
ENSG00000119699	0.388	0.292	0.573	1
ENSG00000204946	0.388	3.84	0.361	1
ENSG00000274922	0.388	0.292	0.573	1
ENSG00000111731	0.387	4.64	0.356	1
ENSG00000135205	0.387	1.32	0.433	1
ENSG00000173918	0.387	2.79	0.385	1
ENSG00000124444	0.386	2.58	0.392	1
ENSG00000142046	0.386	1.39	0.428	1
ENSG00000174953	0.386	4.77	0.358	1
ENSG00000181790	0.386	0.944	0.476	1
ENSG00000229419	0.386	2.2	0.409	1
ENSG00000254685	0.386	4.04	0.365	1
ENSG00000078177	0.385	4.73	0.359	1
ENSG00000152076	0.385	1.03	0.467	1
ENSG00000198108	0.385	2.47	0.389	1
ENSG00000261740	0.385	0.429	0.552	1
ENSG00000259431	0.384	2.96	0.377	1
ENSG00000004866	0.383	3.9	0.373	1
ENSG00000106701	0.383	2.56	0.397	1
ENSG00000117472	0.383	0.555	0.534	1
ENSG00000138162	0.383	4.31	0.365	1
ENSG00000150764	0.383	3.29	0.378	1
ENSG00000164330	0.383	3.16	0.38	1
ENSG00000183929	0.383	0.555	0.534	1
ENSG00000123600	0.382	3.68	0.374	1
ENSG00000143393	0.382	6.72	0.355	1
ENSG00000232713	0.382	0.67	0.518	1
ENSG00000268758	0.382	2.51	0.39	1
ENSG00000186806	0.381	1.75	0.421	1
ENSG00000253159	0.381	3.9	0.375	1
ENSG00000104129	0.38	3.15	0.385	1
ENSG00000151332	0.38	2.14	0.421	1
ENSG00000164050	0.38	2.83	0.39	1
ENSG00000151148	0.379	6.28	0.36	1
ENSG00000019169	0.377	1.71	0.43	1
ENSG00000060656	0.377	1.71	0.43	1
ENSG00000080824	0.377	9.08	0.359	1
ENSG00000114670	0.377	1.06	0.473	1
ENSG00000117983	0.377	0.0207	0.567	1
ENSG00000138134	0.377	0.0207	0.567	1
ENSG00000184227	0.377	1.06	0.473	1
ENSG00000186567	0.377	1.06	0.473	1
ENSG00000188305	0.377	0.0207	0.567	1
ENSG00000224914	0.377	2.4	0.403	1
ENSG00000231453	0.377	3.47	0.382	1
ENSG00000245937	0.377	1.06	0.473	1
ENSG00000106992	0.376	0.185	0.544	1
ENSG00000125618	0.376	2.2	0.421	1
ENSG00000188042	0.376	2.85	0.395	1
ENSG00000122515	0.375	6.69	0.364	1
ENSG00000267632	0.375	0.333	0.582	1
ENSG00000107105	0.374	2.04	0.424	1
ENSG00000120727	0.374	5.03	0.37	1
ENSG00000171621	0.374	4.86	0.373	1
ENSG00000177830	0.374	5.52	0.368	1
ENSG00000188428	0.374	2.51	0.4	1
ENSG00000278864	0.374	0.466	0.56	1
ENSG00000020633	0.373	5.51	0.37	1
ENSG00000089351	0.373	6.19	0.367	1
ENSG00000115718	0.373	0.589	0.542	1
ENSG00000168591	0.373	4.65	0.375	1
ENSG00000067082	0.372	4.93	0.374	1
ENSG00000105676	0.372	3.83	0.382	1
ENSG00000159167	0.372	7.35	0.366	1
ENSG00000176155	0.372	5.51	0.371	1
ENSG00000185920	0.372	3.79	0.384	1
ENSG00000188283	0.372	1.67	0.439	1
ENSG00000196159	0.372	0.702	0.526	1
ENSG00000099308	0.371	5.67	0.372	1
ENSG00000144136	0.371	8.95	0.367	1
ENSG00000165178	0.371	2.45	0.407	1
ENSG00000170921	0.371	4.67	0.377	1
ENSG00000116521	0.37	6.88	0.37	1
ENSG00000124222	0.37	4.6	0.381	1
ENSG00000135749	0.37	5.46	0.374	1
ENSG00000143367	0.37	3.15	0.398	1
ENSG00000169122	0.37	2.22	0.428	1
ENSG00000254681	0.37	2.79	0.406	1
ENSG00000119723	0.369	2.25	0.425	1
ENSG00000119865	0.369	4.11	0.386	1
ENSG00000279159	0.369	3.07	0.405	1
ENSG00000104177	0.368	3.42	0.397	1
ENSG00000124383	0.368	4.03	0.385	1
ENSG00000125731	0.368	1.45	0.466	1
ENSG00000125744	0.368	3.36	0.401	1
ENSG00000145088	0.368	2.67	0.418	1
ENSG00000185418	0.368	3.17	0.399	1
ENSG00000197483	0.368	1.51	0.46	1
ENSG00000214110	0.368	1.69	0.443	1
ENSG00000134531	0.367	7.29	0.373	1
ENSG00000139668	0.367	4.15	0.387	1
ENSG00000154917	0.367	1.89	0.446	1
ENSG00000160336	0.367	3.24	0.397	1
ENSG00000103148	0.366	3.88	0.391	1
ENSG00000108509	0.366	5.2	0.38	1
ENSG00000156453	0.366	2.76	0.414	1
ENSG00000185669	0.366	3.34	0.396	1
ENSG00000205485	0.366	2.34	0.422	1
ENSG00000238164	0.366	2.73	0.416	1
ENSG00000243364	0.366	2.34	0.422	1
ENSG00000155846	0.365	4.17	0.388	1
ENSG00000083720	0.364	3.86	0.39	1
ENSG00000130175	0.364	7.39	0.377	1
ENSG00000163565	0.364	5.65	0.38	1
ENSG00000110492	0.363	1.95	0.446	1
ENSG00000174945	0.363	3.25	0.4	1
ENSG00000185345	0.363	1.47	0.471	1
ENSG00000196295	0.363	2.71	0.42	1
ENSG00000204524	0.363	2.6	0.419	1
ENSG00000234771	0.363	0.931	0.507	1
ENSG00000246922	0.363	0.835	0.52	1
ENSG00000251022	0.363	1.1	0.486	1
ENSG00000253837	0.363	1.47	0.471	1
ENSG00000133961	0.362	8.41	0.379	1
ENSG00000141012	0.362	4.53	0.389	1
ENSG00000151388	0.362	0.229	0.617	1
ENSG00000164976	0.362	0.0697	0.578	1
ENSG00000167220	0.362	0.622	0.55	1
ENSG00000183718	0.362	3.18	0.407	1
ENSG00000205045	0.362	0.229	0.617	1
ENSG00000225808	0.362	0.229	0.617	1
ENSG00000227603	0.362	0.0697	0.578	1
ENSG00000230701	0.362	0.622	0.55	1
ENSG00000278637	0.362	0.0697	0.578	1
ENSG00000101955	0.361	2.75	0.421	1
ENSG00000120915	0.361	2.77	0.419	1
ENSG00000136158	0.361	6.46	0.382	1
ENSG00000152117	0.361	2.97	0.405	1
ENSG00000186222	0.36	2.95	0.409	1
ENSG00000196935	0.359	3.45	0.406	1
ENSG00000239998	0.359	2.67	0.43	1
ENSG00000270069	0.359	4.46	0.396	1
ENSG00000103496	0.358	5.62	0.389	1
ENSG00000108175	0.358	7.47	0.385	1
ENSG00000149179	0.358	4.69	0.394	1
ENSG00000075643	0.357	1.35	0.468	1
ENSG00000137171	0.357	4.09	0.404	1
ENSG00000137494	0.357	3.96	0.403	1
ENSG00000154358	0.357	4.12	0.402	1
ENSG00000132541	0.356	3.8	0.405	1
ENSG00000156026	0.356	4.4	0.397	1
ENSG00000187583	0.356	1.21	0.483	1
ENSG00000070614	0.355	6.79	0.39	1
ENSG00000090263	0.355	2.84	0.421	1
ENSG00000104221	0.355	3.14	0.418	1
ENSG00000186056	0.355	1.04	0.503	1
ENSG00000204262	0.355	0.957	0.514	1
ENSG00000267575	0.355	1.83	0.468	1
ENSG00000272196	0.355	1.88	0.463	1
ENSG00000074370	0.354	5.35	0.395	1
ENSG00000143545	0.354	6.22	0.393	1
ENSG00000224945	0.354	0.863	0.527	1
ENSG00000279390	0.354	0.863	0.527	1
ENSG00000076067	0.353	4.29	0.405	1
ENSG00000124588	0.353	4.21	0.405	1
ENSG00000176406	0.353	3.27	0.413	1
ENSG00000187105	0.353	0.654	0.558	1
ENSG00000110031	0.352	6.73	0.393	1
ENSG00000204220	0.352	4.59	0.404	1
ENSG00000212747	0.352	2.42	0.434	1
ENSG00000246082	0.352	2.35	0.44	1
ENSG00000103507	0.351	5.44	0.398	1
ENSG00000178338	0.351	2.61	0.434	1
ENSG00000215301	0.351	8.07	0.393	1
ENSG00000096433	0.35	5.71	0.399	1
ENSG00000166938	0.35	3.92	0.415	1
ENSG00000172824	0.35	1.8	0.478	1
ENSG00000198780	0.35	1.75	0.461	1
ENSG00000151575	0.349	1.64	0.473	1
ENSG00000167632	0.349	5.04	0.405	1
ENSG00000186260	0.349	3.32	0.422	1
ENSG00000257621	0.349	3.03	0.434	1
ENSG00000265778	0.349	0.271	0.625	1
ENSG00000274712	0.349	0.271	0.625	1
ENSG00000126259	0.348	0.117	0.588	1
ENSG00000149922	0.348	0.117	0.588	1
ENSG00000165804	0.348	3.74	0.419	1
ENSG00000215769	0.348	1.58	0.479	1
ENSG00000225017	0.348	0.117	0.588	1
ENSG00000119650	0.347	2.99	0.44	1
ENSG00000173548	0.347	4.75	0.407	1
ENSG00000198840	0.347	6.48	0.401	1
ENSG00000279089	0.347	0.983	0.521	1
ENSG00000120659	0.346	0.89	0.534	1
ENSG00000144668	0.346	0.89	0.534	1
ENSG00000204272	0.346	3.5	0.42	1
ENSG00000205702	0.346	0.89	0.534	1
ENSG00000078319	0.345	2.48	0.44	1
ENSG00000121068	0.345	2.69	0.446	1
ENSG00000134184	0.345	2.98	0.426	1
ENSG00000161955	0.345	1.32	0.486	1
ENSG00000186409	0.345	3.17	0.429	1
ENSG00000197959	0.345	3.61	0.42	1
ENSG00000251669	0.345	0.792	0.548	1
ENSG00000258297	0.345	0.792	0.548	1
ENSG00000050438	0.344	5.91	0.407	1
ENSG00000111676	0.344	4.49	0.414	1
ENSG00000160602	0.344	1.97	0.469	1
ENSG00000113360	0.343	4.93	0.413	1
ENSG00000151611	0.343	2.7	0.449	1
ENSG00000175003	0.343	0.686	0.565	1
ENSG00000198824	0.343	3.83	0.421	1
ENSG00000204822	0.343	0.686	0.565	1
ENSG00000257122	0.343	0.686	0.565	1
ENSG00000089639	0.342	6.16	0.408	1
ENSG00000138002	0.342	4.02	0.419	1
ENSG00000149809	0.342	3.39	0.433	1
ENSG00000036672	0.341	3.19	0.434	1
ENSG00000048991	0.341	4.71	0.418	1
ENSG00000130312	0.341	3.4	0.434	1
ENSG00000169026	0.341	2.76	0.446	1
ENSG00000180340	0.341	1.09	0.515	1
ENSG00000198416	0.341	1.09	0.515	1
ENSG00000008083	0.34	4.89	0.417	1
ENSG00000103351	0.34	3.13	0.44	1
ENSG00000111012	0.34	3.58	0.429	1
ENSG00000160796	0.34	6.94	0.41	1
ENSG00000174989	0.34	3.31	0.434	1
ENSG00000198417	0.34	1.41	0.484	1
ENSG00000229474	0.34	1.41	0.484	1
ENSG00000273443	0.34	0.448	0.607	1
ENSG00000084710	0.339	5.84	0.414	1
ENSG00000181773	0.339	2.12	0.462	1
ENSG00000188613	0.339	1.34	0.492	1
ENSG00000228253	0.339	4.23	0.423	1
ENSG00000127720	0.338	2.25	0.467	1
ENSG00000164086	0.338	5.42	0.417	1
ENSG00000167815	0.338	4.62	0.421	1
ENSG00000268204	0.338	0.917	0.54	1
ENSG00000170425	0.337	2.47	0.451	1
ENSG00000197872	0.337	3.48	0.434	1
ENSG00000198863	0.337	5.15	0.419	1
ENSG00000091844	0.336	1.74	0.48	1
ENSG00000166821	0.336	1.74	0.48	1
ENSG00000173065	0.336	4.62	0.424	1
ENSG00000189190	0.336	2.83	0.447	1
ENSG00000273015	0.336	3.19	0.441	1
ENSG00000084444	0.335	5.14	0.422	1
ENSG00000172403	0.335	0.717	0.572	1
ENSG00000174586	0.335	0.717	0.572	1
ENSG00000174720	0.335	3.56	0.438	1
ENSG00000197619	0.335	3.21	0.441	1
ENSG00000213347	0.335	0.717	0.572	1
ENSG00000249471	0.335	3.08	0.449	1
ENSG00000021355	0.334	3.99	0.433	1
ENSG00000142065	0.334	0.163	0.598	1
ENSG00000144746	0.334	6.87	0.418	1
ENSG00000177700	0.334	5.88	0.42	1
ENSG00000180801	0.334	0.163	0.598	1
ENSG00000183048	0.334	0.163	0.598	1
ENSG00000229848	0.334	0.163	0.598	1
ENSG00000237187	0.334	2.34	0.465	1
ENSG00000241429	0.334	0.163	0.598	1
ENSG00000251034	0.334	0.163	0.598	1
ENSG00000271870	0.334	0.163	0.598	1
ENSG00000001631	0.333	4.91	0.425	1
ENSG00000073150	0.333	2.95	0.444	1
ENSG00000152518	0.333	4.57	0.432	1
ENSG00000168256	0.333	6.1	0.421	1
ENSG00000173818	0.333	3.46	0.441	1
ENSG00000271614	0.333	1.03	0.533	1
ENSG00000100258	0.332	5.52	0.424	1
ENSG00000115165	0.332	3.09	0.453	1
ENSG00000146556	0.332	3.16	0.448	1
ENSG00000169252	0.332	1.96	0.486	1
ENSG00000169750	0.332	0.606	0.592	1
ENSG00000183155	0.332	3.96	0.437	1
ENSG00000007080	0.331	3.68	0.441	1
ENSG00000129353	0.331	3.03	0.459	1
ENSG00000166171	0.331	3.5	0.441	1
ENSG00000172927	0.331	2.69	0.466	1
ENSG00000182870	0.331	2.96	0.446	1
ENSG00000065526	0.33	6.42	0.425	1
ENSG00000128000	0.33	1.45	0.517	1
ENSG00000129911	0.33	3.77	0.442	1
ENSG00000171291	0.33	-0.0041	0.629	1
ENSG00000213222	0.33	1.87	0.497	1
ENSG00000232063	0.33	-0.0041	0.629	1
ENSG00000249175	0.33	-0.0041	0.629	1
ENSG00000108963	0.329	3.44	0.447	1
ENSG00000122203	0.329	5.75	0.428	1
ENSG00000168172	0.329	6.87	0.426	1
ENSG00000198019	0.329	0.485	0.614	1
ENSG00000100522	0.328	3.2	0.451	1
ENSG00000110060	0.328	3.73	0.447	1
ENSG00000118804	0.328	1.59	0.505	1
ENSG00000143761	0.328	9.26	0.425	1
ENSG00000137700	0.327	3.3	0.452	1
ENSG00000137877	0.327	3.34	0.458	1
ENSG00000164707	0.327	1.88	0.501	1
ENSG00000246695	0.327	1.88	0.501	1
ENSG00000049618	0.326	5.23	0.435	1
ENSG00000088833	0.326	4.26	0.444	1
ENSG00000101126	0.326	5.39	0.433	1
ENSG00000144815	0.326	4.25	0.445	1
ENSG00000155755	0.326	2.13	0.48	1
ENSG00000166997	0.326	2.76	0.467	1
ENSG00000175592	0.326	4.73	0.437	1
ENSG00000176087	0.326	5.82	0.433	1
ENSG00000201772	0.326	1.99	0.493	1
ENSG00000256223	0.326	0.353	0.641	1
ENSG00000260097	0.326	0.353	0.641	1
ENSG00000272183	0.326	0.353	0.641	1
ENSG00000132471	0.325	7.99	0.429	1
ENSG00000133639	0.325	6.95	0.431	1
ENSG00000165879	0.325	1.66	0.502	1
ENSG00000075275	0.324	6.71	0.432	1
ENSG00000119227	0.324	1.24	0.522	1
ENSG00000145476	0.324	3.43	0.456	1
ENSG00000179104	0.324	3.9	0.448	1
ENSG00000179528	0.324	1.61	0.509	1
ENSG00000136878	0.323	5.24	0.439	1
ENSG00000139289	0.323	8.42	0.432	1
ENSG00000150712	0.323	4.98	0.44	1
ENSG00000166025	0.323	4.26	0.448	1
ENSG00000173085	0.323	1.9	0.505	1
ENSG00000197557	0.323	1.4	0.507	1
ENSG00000204604	0.323	3.97	0.449	1
ENSG00000117281	0.322	0.207	0.673	1
ENSG00000129204	0.322	0.207	0.673	1
ENSG00000134202	0.322	5	0.439	1
ENSG00000151131	0.322	2.69	0.479	1
ENSG00000157933	0.322	5.29	0.44	1
ENSG00000164440	0.322	1.85	0.512	1
ENSG00000240230	0.322	3.7	0.452	1
ENSG00000035499	0.321	0.877	0.568	1
ENSG00000165140	0.321	2.87	0.467	1
ENSG00000167380	0.321	2.99	0.468	1
ENSG00000198924	0.321	3.99	0.451	1
ENSG00000277147	0.321	2.1	0.489	1
ENSG00000139718	0.32	4.49	0.449	1
ENSG00000078237	0.319	2.67	0.484	1
ENSG00000080031	0.319	3.85	0.452	1
ENSG00000111196	0.319	2.01	0.5	1
ENSG00000131845	0.319	3.27	0.459	1
ENSG00000135111	0.319	2.01	0.5	1
ENSG00000139880	0.319	2.43	0.478	1
ENSG00000178199	0.319	2.95	0.463	1
ENSG00000179431	0.319	2.24	0.494	1
ENSG00000184792	0.319	1.26	0.527	1
ENSG00000198625	0.319	5.43	0.444	1
ENSG00000233822	0.319	3	0.478	1
ENSG00000100567	0.318	5.93	0.443	1
ENSG00000138738	0.318	1.75	0.503	1
ENSG00000170915	0.318	4.11	0.456	1
ENSG00000215252	0.318	3.74	0.46	1
ENSG00000130723	0.317	7.07	0.441	1
ENSG00000160013	0.317	2.07	0.497	1
ENSG00000069424	0.316	6.84	0.444	1
ENSG00000078140	0.316	4.65	0.451	1
ENSG00000117713	0.316	5.56	0.447	1
ENSG00000130021	0.316	2.8	0.478	1
ENSG00000141934	0.316	0.0457	0.639	1
ENSG00000146700	0.316	0.0457	0.639	1
ENSG00000162390	0.316	3.08	0.476	1
ENSG00000172349	0.316	1.18	0.538	1
ENSG00000226015	0.316	0.0457	0.639	1
ENSG00000242259	0.316	2.65	0.49	1
ENSG00000044459	0.315	3.58	0.464	1
ENSG00000108788	0.315	5.86	0.448	1
ENSG00000112218	0.315	0.392	0.649	1
ENSG00000125482	0.315	3.41	0.47	1
ENSG00000129951	0.315	0.392	0.649	1
ENSG00000156968	0.315	1.76	0.531	1
ENSG00000090861	0.314	7.02	0.447	1
ENSG00000115194	0.314	2.78	0.483	1
ENSG00000118894	0.314	2.45	0.483	1
ENSG00000136848	0.314	2.66	0.492	1
ENSG00000140043	0.314	0.904	0.575	1
ENSG00000142494	0.314	2.45	0.483	1
ENSG00000196850	0.314	4.62	0.456	1
ENSG00000221890	0.314	3.43	0.47	1
ENSG00000248323	0.314	5.36	0.45	1
ENSG00000107719	0.313	1.44	0.517	1
ENSG00000114739	0.313	4.93	0.455	1
ENSG00000123411	0.313	1.58	0.527	1
ENSG00000136828	0.313	1.28	0.532	1
ENSG00000138613	0.313	3.95	0.464	1
ENSG00000173706	0.313	5.04	0.456	1
ENSG00000175575	0.313	2.69	0.491	1
ENSG00000010404	0.312	7.01	0.449	1
ENSG00000056050	0.312	3.36	0.478	1
ENSG00000164935	0.312	6.27	0.45	1
ENSG00000181019	0.312	6.99	0.449	1
ENSG00000181350	0.312	2.67	0.495	1
ENSG00000182919	0.312	2.39	0.492	1
ENSG00000196460	0.312	5.39	0.454	1
ENSG00000198520	0.312	2.6	0.489	1
ENSG00000054611	0.311	4.01	0.463	1
ENSG00000128928	0.311	4.91	0.456	1
ENSG00000140319	0.311	6.18	0.453	1
ENSG00000153140	0.311	2.76	0.488	1
ENSG00000175294	0.311	2	0.513	1
ENSG00000185130	0.311	1.52	0.536	1
ENSG00000200816	0.311	1.78	0.534	1
ENSG00000160888	0.31	5.11	0.46	1
ENSG00000204934	0.31	0.807	0.592	1
ENSG00000223599	0.31	1.02	0.565	1
ENSG00000253821	0.31	0.555	0.629	1
ENSG00000254860	0.31	0.25	0.68	1
ENSG00000266389	0.31	0.555	0.629	1
ENSG00000282798	0.31	0.25	0.68	1
ENSG00000005339	0.309	5.84	0.456	1
ENSG00000083123	0.309	2.94	0.478	1
ENSG00000090238	0.309	4.28	0.466	1
ENSG00000111845	0.309	2.99	0.485	1
ENSG00000133561	0.309	3.93	0.471	1
ENSG00000168827	0.309	5.61	0.456	1
ENSG00000169105	0.309	3.09	0.485	1
ENSG00000141642	0.308	2.01	0.516	1
ENSG00000170634	0.308	2.28	0.506	1
ENSG00000157657	0.307	2.48	0.506	1
ENSG00000160072	0.307	3.76	0.476	1
ENSG00000162869	0.307	3.38	0.484	1
ENSG00000214106	0.307	1.13	0.557	1
ENSG00000275713	0.307	3.16	0.483	1
ENSG00000047648	0.306	1.96	0.523	1
ENSG00000105983	0.306	5.34	0.463	1
ENSG00000111271	0.306	4.93	0.465	1
ENSG00000115211	0.306	4.33	0.468	1
ENSG00000134684	0.306	7.14	0.458	1
ENSG00000136636	0.306	5.04	0.466	1
ENSG00000176853	0.306	7.37	0.458	1
ENSG00000181264	0.306	0.702	0.612	1
ENSG00000226312	0.306	1.96	0.523	1
ENSG00000259207	0.306	6.14	0.46	1
ENSG00000054793	0.305	6.42	0.46	1
ENSG00000102053	0.305	1.74	0.523	1
ENSG00000233025	0.305	0.43	0.656	1
ENSG00000072310	0.304	4.35	0.472	1
ENSG00000114757	0.304	1.05	0.571	1
ENSG00000116473	0.304	5.78	0.464	1
ENSG00000127081	0.304	2.76	0.498	1
ENSG00000134780	0.304	4.85	0.467	1
ENSG00000140807	0.304	1.48	0.551	1
ENSG00000141384	0.304	3.24	0.482	1
ENSG00000158417	0.304	4.41	0.474	1
ENSG00000067445	0.303	4	0.477	1
ENSG00000100288	0.303	0.835	0.599	1
ENSG00000132670	0.303	5.05	0.469	1
ENSG00000160193	0.303	2.3	0.512	1
ENSG00000161243	0.303	0.0938	0.648	1
ENSG00000163347	0.303	0.835	0.599	1
ENSG00000180353	0.303	7.15	0.463	1
ENSG00000213918	0.303	4.31	0.473	1
ENSG00000246067	0.303	1.32	0.543	1
ENSG00000089163	0.302	1.15	0.562	1
ENSG00000128596	0.302	2.22	0.52	1
ENSG00000142166	0.302	6.22	0.465	1
ENSG00000188827	0.302	5.13	0.471	1
ENSG00000273230	0.302	1.15	0.562	1
ENSG00000115239	0.301	1.41	0.537	1
ENSG00000118420	0.301	2.03	0.523	1
ENSG00000132535	0.301	3.72	0.482	1
ENSG00000185070	0.301	2.58	0.507	1
ENSG00000057935	0.3	2.71	0.508	1
ENSG00000104863	0.3	0.957	0.587	1
ENSG00000120071	0.3	5.35	0.472	1
ENSG00000178184	0.3	0.957	0.587	1
ENSG00000224870	0.3	3.62	0.49	1
ENSG00000007350	0.299	1.99	0.53	1
ENSG00000075826	0.299	3.71	0.485	1
ENSG00000120685	0.299	4.24	0.483	1
ENSG00000126653	0.299	3.47	0.488	1
ENSG00000131944	0.299	0.292	0.688	1
ENSG00000167635	0.299	4.43	0.479	1
ENSG00000167962	0.299	4.89	0.475	1
ENSG00000186918	0.299	2.92	0.494	1
ENSG00000214353	0.299	1.49	0.555	1
ENSG00000259943	0.299	1.7	0.535	1
ENSG00000105339	0.298	6.28	0.471	1
ENSG00000106688	0.298	2.81	0.503	1
ENSG00000133121	0.298	3.84	0.484	1
ENSG00000152402	0.298	2.32	0.517	1
ENSG00000162004	0.298	2.66	0.516	1
ENSG00000173200	0.298	2.19	0.529	1
ENSG00000215126	0.298	1.07	0.576	1
ENSG00000010295	0.297	3.99	0.485	1
ENSG00000126705	0.297	4.62	0.48	1
ENSG00000133138	0.297	1.94	0.537	1
ENSG00000180011	0.297	4.22	0.483	1
ENSG00000206530	0.297	2.1	0.523	1
ENSG00000086570	0.296	0.863	0.605	1
ENSG00000127947	0.296	7.14	0.473	1
ENSG00000178188	0.296	5.1	0.479	1
ENSG00000182518	0.296	2.15	0.52	1
ENSG00000198719	0.296	3.23	0.494	1
ENSG00000223745	0.296	2.56	0.516	1
ENSG00000227500	0.296	4.64	0.481	1
ENSG00000261512	0.296	1.43	0.542	1
ENSG00000130528	0.295	0.467	0.663	1
ENSG00000137656	0.295	3.37	0.502	1
ENSG00000162419	0.295	3.85	0.493	1
ENSG00000163626	0.295	2.97	0.507	1
ENSG00000010327	0.294	0.983	0.593	1
ENSG00000106299	0.294	4.59	0.487	1
ENSG00000160285	0.294	5.63	0.479	1
ENSG00000166823	0.294	0.983	0.593	1
ENSG00000197599	0.294	1.96	0.54	1
ENSG00000198727	0.294	7.87	0.475	1
ENSG00000123700	0.293	1.85	0.553	1
ENSG00000182742	0.293	1.59	0.554	1
ENSG00000236383	0.293	2.89	0.504	1
ENSG00000242516	0.293	1.36	0.553	1
ENSG00000258441	0.293	2.57	0.518	1
ENSG00000264943	0.293	0.622	0.642	1
ENSG00000271122	0.293	0.622	0.642	1
ENSG00000083168	0.292	6.74	0.479	1
ENSG00000123358	0.292	1.09	0.582	1
ENSG00000125319	0.292	1.91	0.548	1
ENSG00000131398	0.292	4.65	0.486	1
ENSG00000156535	0.292	7.88	0.477	1
ENSG00000185189	0.292	3.38	0.505	1
ENSG00000088179	0.291	3.25	0.501	1
ENSG00000101115	0.291	1.73	0.543	1
ENSG00000118849	0.291	0.14	0.657	1
ENSG00000157045	0.291	4.36	0.492	1
ENSG00000176714	0.291	0.14	0.657	1
ENSG00000185250	0.291	0.14	0.657	1
ENSG00000229598	0.291	0.14	0.657	1
ENSG00000102897	0.29	3.65	0.502	1
ENSG00000106069	0.29	2.4	0.523	1
ENSG00000115286	0.29	3.63	0.504	1
ENSG00000124356	0.29	5.3	0.487	1
ENSG00000128309	0.29	4.23	0.497	1
ENSG00000130762	0.29	2.65	0.527	1
ENSG00000204954	0.29	2.4	0.523	1
ENSG00000205336	0.29	3.65	0.502	1
ENSG00000128654	0.289	4.04	0.494	1
ENSG00000171109	0.289	5.54	0.487	1
ENSG00000183604	0.289	1.29	0.565	1
ENSG00000214174	0.289	1.29	0.565	1
ENSG00000068615	0.288	1.38	0.557	1
ENSG00000100890	0.288	1.68	0.552	1
ENSG00000106733	0.288	3.91	0.5	1
ENSG00000115806	0.288	5.76	0.487	1
ENSG00000123384	0.288	7.22	0.485	1
ENSG00000137135	0.288	0.333	0.694	1
ENSG00000150347	0.288	4.48	0.496	1
ENSG00000159216	0.288	6.12	0.487	1
ENSG00000163734	0.288	4.25	0.499	1
ENSG00000215795	0.288	0.333	0.694	1
ENSG00000185838	0.287	2.45	0.523	1
ENSG00000236939	0.287	1.01	0.598	1
ENSG00000265660	0.287	1.01	0.598	1
ENSG00000048649	0.286	5.35	0.493	1
ENSG00000071243	0.286	2.53	0.533	1
ENSG00000113231	0.286	0.503	0.669	1
ENSG00000117594	0.286	0.503	0.669	1
ENSG00000145075	0.286	1.12	0.587	1
ENSG00000164758	0.286	2.83	0.519	1
ENSG00000166839	0.286	1.12	0.587	1
ENSG00000189042	0.286	1.88	0.56	1
ENSG00000196811	0.286	1.12	0.587	1
ENSG00000111802	0.285	4.78	0.495	1
ENSG00000119283	0.285	0.655	0.649	1
ENSG00000144711	0.285	5.38	0.494	1
ENSG00000161921	0.285	4.25	0.503	1
ENSG00000264364	0.285	5.08	0.494	1
ENSG00000104853	0.284	6.84	0.491	1
ENSG00000131016	0.284	1.31	0.57	1
ENSG00000166068	0.284	4.93	0.497	1
ENSG00000274210	0.284	1.31	0.57	1
ENSG00000100714	0.283	4.89	0.498	1
ENSG00000131043	0.283	4.84	0.499	1
ENSG00000158714	0.283	5.3	0.498	1
ENSG00000186300	0.283	1.83	0.569	1
ENSG00000235859	0.283	1.83	0.569	1
ENSG00000124615	0.282	2.01	0.553	1
ENSG00000131591	0.282	3	0.525	1
ENSG00000164414	0.282	2.58	0.534	1
ENSG00000165023	0.282	3.8	0.51	1
ENSG00000213891	0.282	0.918	0.616	1
ENSG00000237310	0.282	1.56	0.573	1
ENSG00000071575	0.281	1.64	0.566	1
ENSG00000092871	0.281	4.9	0.504	1
ENSG00000133226	0.281	5.17	0.501	1
ENSG00000137812	0.281	3.36	0.523	1
ENSG00000160767	0.281	3.95	0.512	1
ENSG00000165029	0.281	7.39	0.495	1
ENSG00000166825	0.281	9.94	0.494	1
ENSG00000170537	0.281	1.03	0.604	1
ENSG00000175354	0.281	4.87	0.5	1
ENSG00000198837	0.281	5.93	0.497	1
ENSG00000255182	0.281	1.14	0.593	1
ENSG00000048707	0.28	6.41	0.498	1
ENSG00000095066	0.28	3.03	0.533	1
ENSG00000100941	0.28	4.6	0.507	1
ENSG00000109321	0.28	5.12	0.505	1
ENSG00000180229	0.28	2.22	0.553	1
ENSG00000186174	0.28	5.41	0.502	1
ENSG00000233527	0.28	0.186	0.665	1
ENSG00000102870	0.279	4.84	0.505	1
ENSG00000119812	0.279	4.76	0.505	1
ENSG00000139154	0.279	2.92	0.523	1
ENSG00000140382	0.279	5.07	0.504	1
ENSG00000142102	0.279	1.96	0.561	1
ENSG00000167566	0.279	4.31	0.509	1
ENSG00000180425	0.279	0.373	0.701	1
ENSG00000184154	0.279	2.31	0.545	1
ENSG00000263843	0.279	0.373	0.701	1
ENSG00000275342	0.279	4.39	0.513	1
ENSG00000100442	0.278	3.96	0.516	1
ENSG00000144935	0.278	1.5	0.584	1
ENSG00000162825	0.278	2.9	0.527	1
ENSG00000166289	0.278	2.9	0.527	1
ENSG00000167306	0.278	0.538	0.676	1
ENSG00000198786	0.278	8.1	0.499	1
ENSG00000015479	0.277	2.32	0.548	1
ENSG00000024422	0.277	3.42	0.525	1
ENSG00000065989	0.277	3.94	0.519	1
ENSG00000079482	0.277	3.15	0.529	1
ENSG00000125846	0.277	2.67	0.545	1
ENSG00000139180	0.277	2.74	0.54	1
ENSG00000155897	0.277	6.55	0.502	1
ENSG00000163322	0.277	1.86	0.576	1
ENSG00000165813	0.277	3.7	0.518	1
ENSG00000177951	0.277	4.92	0.509	1
ENSG00000184634	0.277	5.8	0.504	1
ENSG00000188191	0.277	2.67	0.545	1
ENSG00000232533	0.277	2.28	0.552	1
ENSG00000240476	0.277	1.65	0.57	1
ENSG00000251158	0.277	0.687	0.655	1
ENSG00000073605	0.276	2.09	0.555	1
ENSG00000100330	0.276	2.9	0.528	1
ENSG00000100949	0.276	5.14	0.508	1
ENSG00000109787	0.276	4.12	0.518	1
ENSG00000137819	0.276	4.35	0.512	1
ENSG00000143970	0.276	6.26	0.505	1
ENSG00000153037	0.276	2.49	0.55	1
ENSG00000171476	0.276	3.43	0.527	1
ENSG00000180071	0.276	0.944	0.622	1
ENSG00000187522	0.276	3.52	0.519	1
ENSG00000188013	0.276	0.821	0.637	1
ENSG00000259436	0.276	3.36	0.531	1
ENSG00000103035	0.275	5.29	0.509	1
ENSG00000138036	0.275	3.74	0.518	1
ENSG00000149115	0.275	7.37	0.505	1
ENSG00000169762	0.275	3.39	0.531	1
ENSG00000172687	0.275	1.16	0.598	1
ENSG00000182902	0.275	1.16	0.598	1
ENSG00000184937	0.275	3.32	0.535	1
ENSG00000198406	0.275	2.72	0.544	1
ENSG00000228903	0.275	1.35	0.579	1
ENSG00000233695	0.275	2.14	0.551	1
ENSG00000075975	0.274	5.14	0.512	1
ENSG00000103274	0.274	1.74	0.592	1
ENSG00000115904	0.274	5.55	0.51	1
ENSG00000147789	0.274	3.08	0.538	1
ENSG00000152760	0.274	4.55	0.517	1
ENSG00000180884	0.274	1.67	0.574	1
ENSG00000105373	0.273	5.68	0.511	1
ENSG00000105953	0.273	7.69	0.507	1
ENSG00000155008	0.273	4.27	0.521	1
ENSG00000157680	0.273	2.05	0.563	1
ENSG00000185634	0.273	2.05	0.563	1
ENSG00000198799	0.273	5.14	0.513	1
ENSG00000228477	0.273	4.01	0.52	1
ENSG00000269821	0.273	3.63	0.529	1
ENSG00000076826	0.272	2.34	0.553	1
ENSG00000122687	0.272	3.69	0.527	1
ENSG00000177465	0.272	3.01	0.539	1
ENSG00000203668	0.272	3.22	0.532	1
ENSG00000103489	0.271	4.45	0.52	1
ENSG00000133028	0.271	3.58	0.528	1
ENSG00000167703	0.271	6.37	0.512	1
ENSG00000063176	0.27	2.52	0.557	1
ENSG00000072858	0.27	0.718	0.661	1
ENSG00000105321	0.27	2.84	0.543	1
ENSG00000105767	0.27	1.76	0.596	1
ENSG00000112599	0.27	0.411	0.707	1
ENSG00000119547	0.27	0.572	0.682	1
ENSG00000127838	0.27	5.67	0.515	1
ENSG00000148337	0.27	5.82	0.515	1
ENSG00000153531	0.27	3.68	0.53	1
ENSG00000182511	0.27	3.73	0.527	1
ENSG00000186907	0.27	1.94	0.576	1
ENSG00000187091	0.27	2.48	0.561	1
ENSG00000196924	0.27	1.61	0.585	1
ENSG00000197102	0.27	8.96	0.512	1
ENSG00000198483	0.27	1.82	0.589	1
ENSG00000215421	0.27	3.8	0.528	1
ENSG00000274386	0.27	1.28	0.593	1
ENSG00000280279	0.27	0.411	0.707	1
ENSG00000068137	0.269	2.97	0.546	1
ENSG00000104691	0.269	2.91	0.54	1
ENSG00000124788	0.269	5.49	0.518	1
ENSG00000133858	0.269	5.37	0.519	1
ENSG00000142235	0.269	0.229	0.739	1
ENSG00000143450	0.269	0.0213	0.703	1
ENSG00000160563	0.269	3.87	0.531	1
ENSG00000163814	0.269	4.55	0.523	1
ENSG00000174231	0.269	7.84	0.514	1
ENSG00000250116	0.269	0.229	0.739	1
ENSG00000267702	0.269	0.229	0.739	1
ENSG00000279549	0.269	0.0213	0.703	1
ENSG00000111237	0.268	5.15	0.52	1
ENSG00000120318	0.268	5.25	0.52	1
ENSG00000133641	0.268	3.64	0.537	1
ENSG00000158805	0.268	3.96	0.531	1
ENSG00000170458	0.268	2.49	0.563	1
ENSG00000181588	0.268	2.36	0.558	1
ENSG00000183666	0.268	2.32	0.562	1
ENSG00000244005	0.268	4.51	0.524	1
ENSG00000012048	0.267	4.27	0.53	1
ENSG00000090857	0.267	5.08	0.522	1
ENSG00000102043	0.267	2.01	0.574	1
ENSG00000126264	0.267	3.27	0.536	1
ENSG00000163738	0.267	3.66	0.537	1
ENSG00000214114	0.267	2.61	0.555	1
ENSG00000257654	0.267	1.7	0.581	1
ENSG00000086475	0.266	3.96	0.534	1
ENSG00000109099	0.266	3.14	0.545	1
ENSG00000115107	0.266	4.8	0.528	1
ENSG00000118690	0.266	1.63	0.589	1
ENSG00000183570	0.266	1.48	0.605	1
ENSG00000270647	0.266	3.97	0.533	1
ENSG00000272899	0.266	3.27	0.537	1
ENSG00000040531	0.265	4.18	0.531	1
ENSG00000102781	0.265	4.12	0.535	1
ENSG00000103091	0.265	4.27	0.533	1
ENSG00000125355	0.265	2.83	0.551	1
ENSG00000137522	0.265	3.8	0.535	1
ENSG00000161999	0.265	3.07	0.553	1
ENSG00000166352	0.265	2.28	0.569	1
ENSG00000197312	0.265	5.72	0.523	1
ENSG00000260630	0.265	2.69	0.562	1
ENSG00000266173	0.265	3.12	0.549	1
ENSG00000270980	0.265	1.21	0.608	1
ENSG00000130584	0.264	4.97	0.528	1
ENSG00000130962	0.264	3.86	0.539	1
ENSG00000134986	0.264	3.08	0.555	1
ENSG00000158286	0.264	1.11	0.619	1
ENSG00000169131	0.264	3.1	0.553	1
ENSG00000226380	0.264	3.83	0.542	1
ENSG00000229124	0.264	0.996	0.633	1
ENSG00000239382	0.264	1.11	0.619	1
ENSG00000099282	0.263	2.9	0.549	1
ENSG00000123342	0.263	6.35	0.524	1
ENSG00000124920	0.263	3.94	0.54	1
ENSG00000140682	0.263	2.63	0.559	1
ENSG00000147509	0.263	1.78	0.603	1
ENSG00000163395	0.263	3.26	0.542	1
ENSG00000196502	0.263	3.52	0.539	1
ENSG00000215447	0.263	0.748	0.666	1
ENSG00000265298	0.263	2.2	0.581	1
ENSG00000075131	0.262	2.52	0.57	1
ENSG00000124120	0.262	4.38	0.54	1
ENSG00000177150	0.262	3.7	0.542	1
ENSG00000183520	0.262	4.63	0.533	1
ENSG00000248008	0.262	0.606	0.688	1
ENSG00000274627	0.262	2.87	0.552	1
ENSG00000279762	0.262	0.606	0.688	1
ENSG00000125388	0.261	1.32	0.602	1
ENSG00000198804	0.261	11.8	0.524	1
ENSG00000207181	0.261	0.449	0.713	1
ENSG00000228439	0.261	0.449	0.713	1
ENSG00000005100	0.26	3.17	0.553	1
ENSG00000006638	0.26	1.73	0.614	1
ENSG00000093217	0.26	2.68	0.572	1
ENSG00000133059	0.26	5.37	0.533	1
ENSG00000135605	0.26	3.74	0.542	1
ENSG00000153815	0.26	5	0.535	1
ENSG00000229180	0.26	3.58	0.547	1
ENSG00000071054	0.259	7.79	0.528	1
ENSG00000078399	0.259	3.76	0.547	1
ENSG00000100664	0.259	8.4	0.528	1
ENSG00000157999	0.259	0.272	0.745	1
ENSG00000165868	0.259	2.31	0.577	1
ENSG00000179941	0.259	3.99	0.543	1
ENSG00000186063	0.259	6.48	0.531	1
ENSG00000213139	0.259	0.272	0.745	1
ENSG00000241127	0.259	2.4	0.568	1
ENSG00000248333	0.259	3.58	0.548	1
ENSG00000249855	0.259	0.272	0.745	1
ENSG00000063180	0.258	1.88	0.602	1
ENSG00000100124	0.258	4	0.545	1
ENSG00000134897	0.258	2.53	0.574	1
ENSG00000141965	0.258	0.0702	0.711	1
ENSG00000145416	0.258	1.02	0.638	1
ENSG00000187017	0.258	0.0702	0.711	1
ENSG00000198286	0.258	0.0702	0.711	1
ENSG00000227827	0.258	1.51	0.613	1
ENSG00000232940	0.258	0.0702	0.711	1
ENSG00000235954	0.258	0.0702	0.711	1
ENSG00000267265	0.258	0.0702	0.711	1
ENSG00000100417	0.257	2.83	0.563	1
ENSG00000119421	0.257	4.57	0.541	1
ENSG00000134333	0.257	7.67	0.533	1
ENSG00000144115	0.257	1.81	0.609	1
ENSG00000168779	0.257	4.82	0.542	1
ENSG00000204514	0.257	2.58	0.573	1
ENSG00000066427	0.256	4.58	0.542	1
ENSG00000104888	0.256	4.29	0.547	1
ENSG00000107331	0.256	5.48	0.539	1
ENSG00000116198	0.256	5.14	0.541	1
ENSG00000125089	0.256	5.89	0.537	1
ENSG00000134532	0.256	3.54	0.55	1
ENSG00000136936	0.256	2.73	0.572	1
ENSG00000142544	0.256	2.01	0.592	1
ENSG00000145428	0.256	2.06	0.586	1
ENSG00000149016	0.256	2.97	0.567	1
ENSG00000150907	0.256	3.02	0.561	1
ENSG00000157734	0.256	1.68	0.6	1
ENSG00000184226	0.256	2.06	0.586	1
ENSG00000188130	0.256	3.99	0.548	1
ENSG00000243716	0.256	1.68	0.6	1
ENSG00000059145	0.255	3.64	0.557	1
ENSG00000112759	0.255	5.42	0.54	1
ENSG00000139826	0.255	4.04	0.551	1
ENSG00000147130	0.255	5.15	0.541	1
ENSG00000166987	0.255	4.01	0.548	1
ENSG00000175826	0.255	3.41	0.559	1
ENSG00000198908	0.255	1.61	0.608	1
ENSG00000213762	0.255	3.93	0.549	1
ENSG00000228594	0.255	2.63	0.571	1
ENSG00000063601	0.254	4.39	0.551	1
ENSG00000090060	0.254	7.12	0.538	1
ENSG00000111981	0.254	0.639	0.693	1
ENSG00000125266	0.254	2.47	0.587	1
ENSG00000129450	0.254	2.51	0.583	1
ENSG00000137764	0.254	3.3	0.562	1
ENSG00000138798	0.254	1.15	0.629	1
ENSG00000142082	0.254	2.47	0.587	1
ENSG00000148143	0.254	4.45	0.546	1
ENSG00000161395	0.254	3.7	0.555	1
ENSG00000164010	0.254	4.38	0.552	1
ENSG00000217930	0.254	0.639	0.693	1
ENSG00000122435	0.253	3.49	0.557	1
ENSG00000128694	0.253	1.45	0.601	1
ENSG00000136925	0.253	2.85	0.568	1
ENSG00000146701	0.253	7.01	0.54	1
ENSG00000149639	0.253	5.74	0.542	1
ENSG00000164684	0.253	2.43	0.575	1
ENSG00000166340	0.253	7.57	0.539	1
ENSG00000186594	0.253	3.94	0.556	1
ENSG00000115325	0.252	4.99	0.549	1
ENSG00000170430	0.252	2.76	0.578	1
ENSG00000184840	0.252	6.58	0.541	1
ENSG00000196712	0.252	7.65	0.541	1
ENSG00000071462	0.251	5.76	0.546	1
ENSG00000108557	0.251	3.6	0.567	1
ENSG00000111639	0.251	4.82	0.551	1
ENSG00000133247	0.251	3.71	0.558	1
ENSG00000158987	0.251	2.86	0.57	1
ENSG00000278948	0.251	1.27	0.622	1
ENSG00000047621	0.25	3.72	0.559	1
ENSG00000081760	0.25	4.7	0.551	1
ENSG00000126870	0.25	2.87	0.572	1
ENSG00000140323	0.25	0.807	0.677	1
ENSG00000157110	0.25	1.55	0.621	1
ENSG00000157551	0.25	0.313	0.751	1
ENSG00000160991	0.25	5.22	0.549	1
ENSG00000163832	0.25	3.32	0.575	1
ENSG00000174652	0.25	3.81	0.559	1
ENSG00000177728	0.25	6.29	0.546	1
ENSG00000177738	0.25	0.807	0.677	1
ENSG00000197885	0.25	2.76	0.58	1
ENSG00000255491	0.25	1.55	0.621	1
ENSG00000100629	0.249	2.31	0.592	1
ENSG00000100982	0.249	2.93	0.579	1
ENSG00000106290	0.249	4.52	0.557	1
ENSG00000143643	0.249	6.01	0.549	1
ENSG00000149260	0.249	2.84	0.575	1
ENSG00000156127	0.249	3.46	0.566	1
ENSG00000159210	0.249	5.33	0.55	1
ENSG00000168090	0.249	4.59	0.554	1
ENSG00000171467	0.249	7	0.546	1
ENSG00000184584	0.249	4.47	0.554	1
ENSG00000028277	0.248	6.02	0.549	1
ENSG00000118263	0.248	4.76	0.557	1
ENSG00000125962	0.248	3.82	0.562	1
ENSG00000143398	0.248	5.99	0.55	1
ENSG00000152763	0.248	1.38	0.615	1
ENSG00000181826	0.248	3.28	0.564	1
ENSG00000184828	0.248	2.21	0.602	1
ENSG00000197927	0.248	1.38	0.615	1
ENSG00000232388	0.248	2.36	0.589	1
ENSG00000251562	0.248	12.7	0.545	1
ENSG00000267121	0.248	5.22	0.553	1
ENSG00000276509	0.248	1.07	0.648	1
ENSG00000111077	0.247	3.13	0.577	1
ENSG00000130592	0.247	3.75	0.562	1
ENSG00000130702	0.247	4.52	0.56	1
ENSG00000134297	0.247	2.95	0.582	1
ENSG00000140030	0.247	2.16	0.592	1
ENSG00000159307	0.247	0.671	0.699	1
ENSG00000161642	0.247	4.94	0.554	1
ENSG00000168488	0.247	6.78	0.549	1
ENSG00000171316	0.247	6.12	0.55	1
ENSG00000181031	0.247	0.118	0.719	1
ENSG00000187866	0.247	3.73	0.563	1
ENSG00000214176	0.247	5.77	0.551	1
ENSG00000253309	0.247	0.118	0.719	1
ENSG00000266094	0.247	7.22	0.549	1
ENSG00000277918	0.247	0.118	0.719	1
ENSG00000125122	0.246	1.56	0.625	1
ENSG00000160993	0.246	2.89	0.577	1
ENSG00000176124	0.246	1.29	0.626	1
ENSG00000203855	0.246	0.957	0.664	1
ENSG00000213024	0.246	5.49	0.554	1
ENSG00000234456	0.246	2.59	0.589	1
ENSG00000066056	0.245	3.11	0.582	1
ENSG00000067606	0.245	0.521	0.725	1
ENSG00000109814	0.245	5.11	0.558	1
ENSG00000112394	0.245	0.521	0.725	1
ENSG00000133812	0.245	5.3	0.557	1
ENSG00000070761	0.244	4.23	0.565	1
ENSG00000130827	0.244	5.93	0.556	1
ENSG00000143252	0.244	5.52	0.557	1
ENSG00000165383	0.244	1.2	0.639	1
ENSG00000184508	0.244	1.65	0.619	1
ENSG00000186364	0.244	2.12	0.6	1
ENSG00000258704	0.244	1.2	0.639	1
ENSG00000072110	0.243	8.88	0.555	1
ENSG00000103742	0.243	2.34	0.599	1
ENSG00000104885	0.243	8.3	0.554	1
ENSG00000152556	0.243	4.07	0.569	1
ENSG00000167065	0.243	3.7	0.572	1
ENSG00000170464	0.243	2.65	0.589	1
ENSG00000255284	0.243	0.836	0.682	1
ENSG00000073910	0.242	4.97	0.561	1
ENSG00000100577	0.242	4.1	0.568	1
ENSG00000123329	0.242	4.32	0.567	1
ENSG00000164169	0.242	4.1	0.568	1
ENSG00000175274	0.242	4.28	0.57	1
ENSG00000177125	0.242	4.67	0.566	1
ENSG00000196199	0.242	4.38	0.571	1
ENSG00000204764	0.242	2.48	0.605	1
ENSG00000059915	0.241	2.44	0.61	1
ENSG00000066294	0.241	2.53	0.602	1
ENSG00000069399	0.241	2.94	0.592	1
ENSG00000075651	0.241	5.13	0.564	1
ENSG00000106976	0.241	5.16	0.564	1
ENSG00000136854	0.241	4.24	0.569	1
ENSG00000150630	0.241	2.44	0.61	1
ENSG00000152669	0.241	2.13	0.603	1
ENSG00000171224	0.241	0.353	0.756	1
ENSG00000198223	0.241	4.77	0.567	1
ENSG00000204381	0.241	2.73	0.596	1
ENSG00000232237	0.241	0.353	0.756	1
ENSG00000243943	0.241	3.29	0.584	1
ENSG00000258727	0.241	0.353	0.756	1
ENSG00000260367	0.241	0.353	0.756	1
ENSG00000260693	0.241	0.702	0.704	1
ENSG00000269899	0.241	1.5	0.639	1
ENSG00000086232	0.24	6.42	0.562	1
ENSG00000112245	0.24	6.21	0.562	1
ENSG00000118058	0.24	6.26	0.561	1
ENSG00000128564	0.24	2.62	0.595	1
ENSG00000129596	0.24	2.49	0.607	1
ENSG00000163249	0.24	3.48	0.578	1
ENSG00000168995	0.24	0.983	0.669	1
ENSG00000179364	0.24	5.96	0.563	1
ENSG00000188559	0.24	4.91	0.569	1
ENSG00000253200	0.24	0.983	0.669	1
ENSG00000278588	0.24	2.2	0.6	1
ENSG00000105258	0.239	2.26	0.612	1
ENSG00000108474	0.239	2.15	0.606	1
ENSG00000110514	0.239	6.6	0.562	1
ENSG00000134453	0.239	4.55	0.571	1
ENSG00000142599	0.239	4.07	0.576	1
ENSG00000143258	0.239	4.16	0.573	1
[truncated: 11,641 more rows]
